# Supplementary material for: The effects of different types of calorie restrictions on epigenetic modifications of age-related genes in aging mouse brain
Source: Research Square preprint supplement (doi:10.21203/rs.3.rs-6759616/v1), 2025-06-03
Supplement: Supplementary file 1 [file aa03954ca2c94e1bc20ea20b.docx]

**
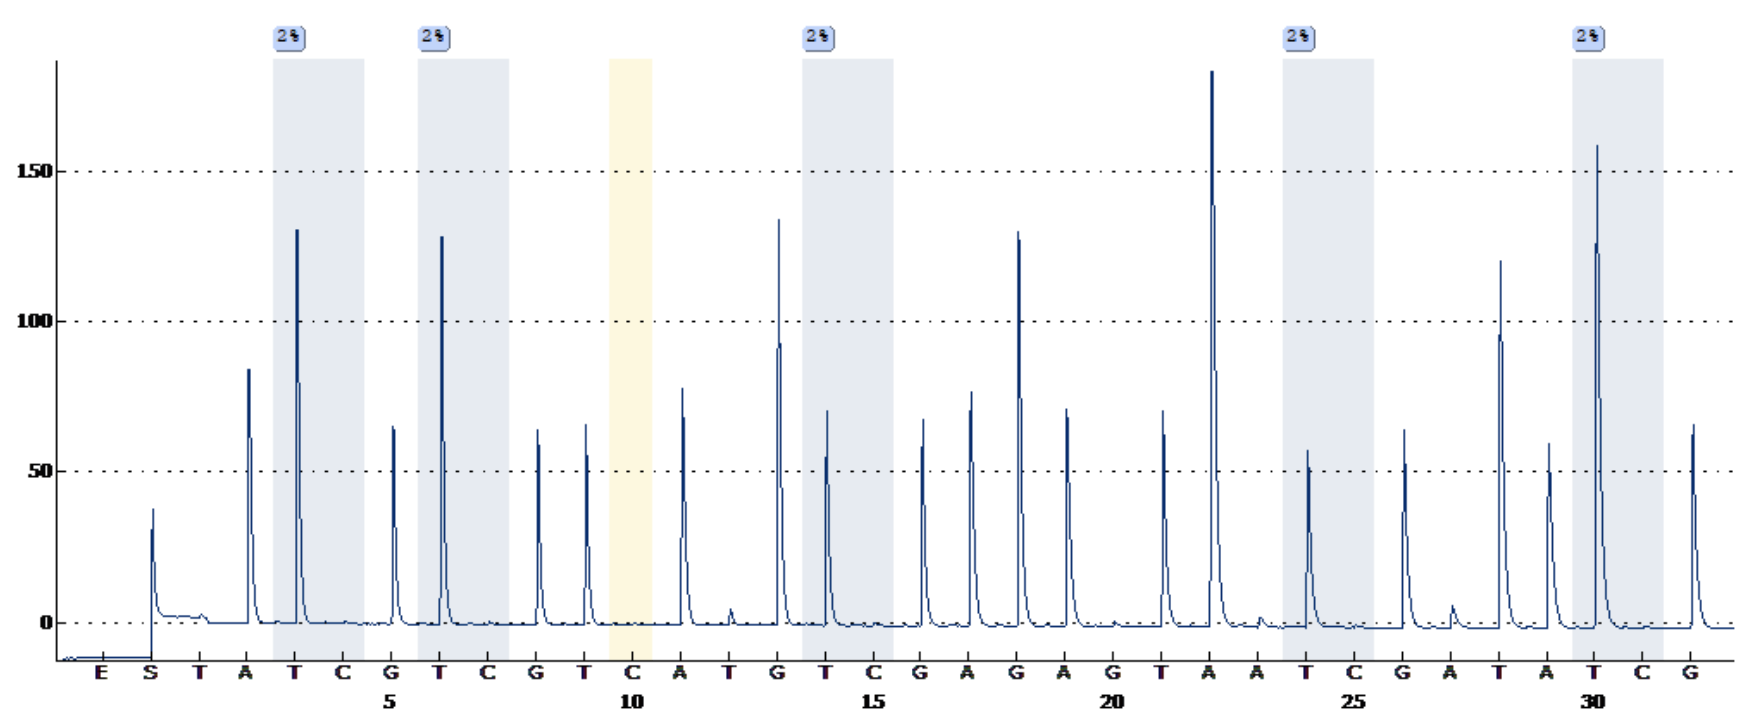
**

*Igf1r*

**A.**

*Adipor1*

**B.**

**
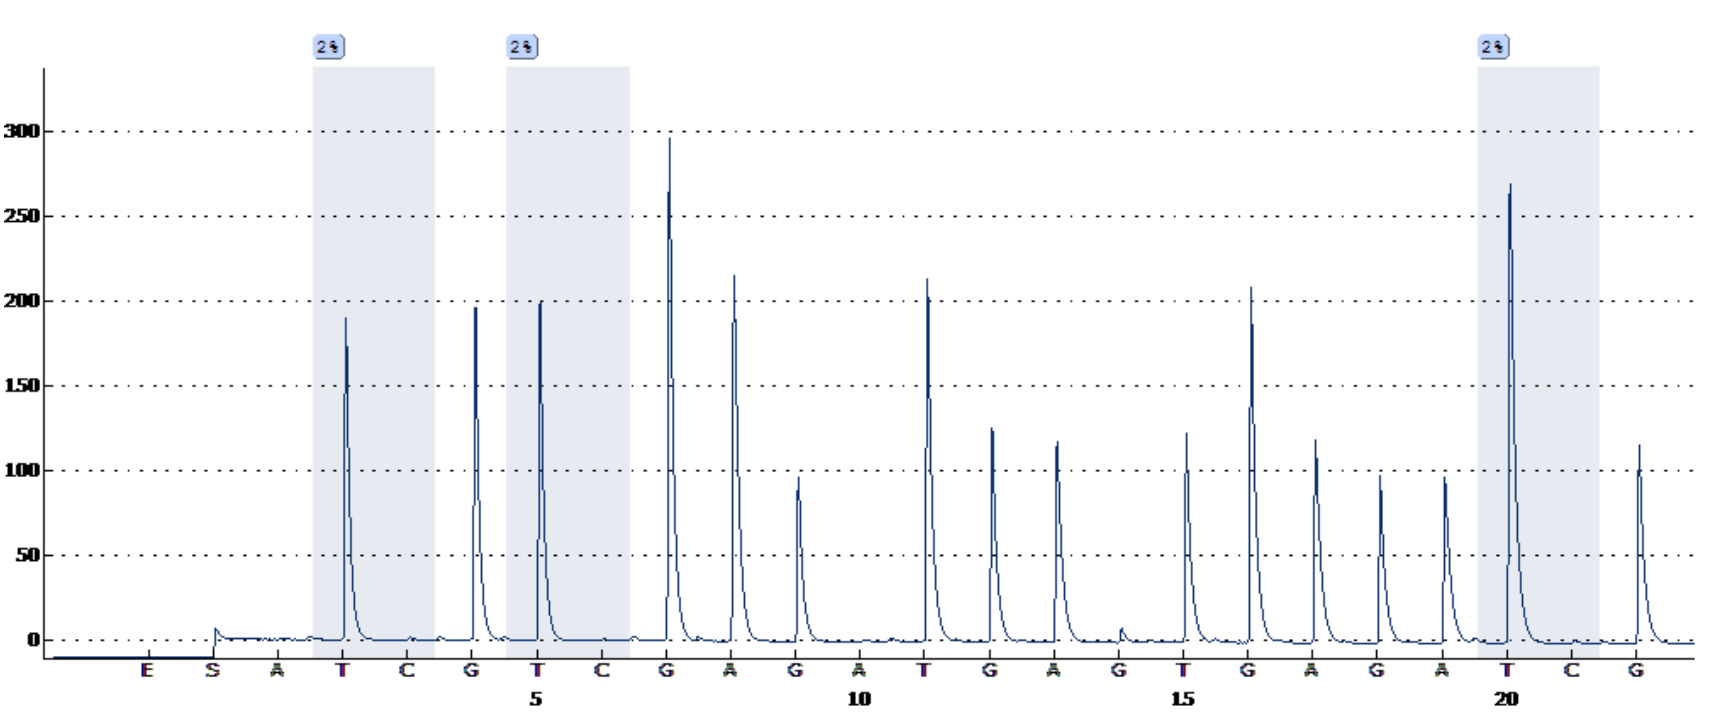
**

*Foxo1*

**C.**

**
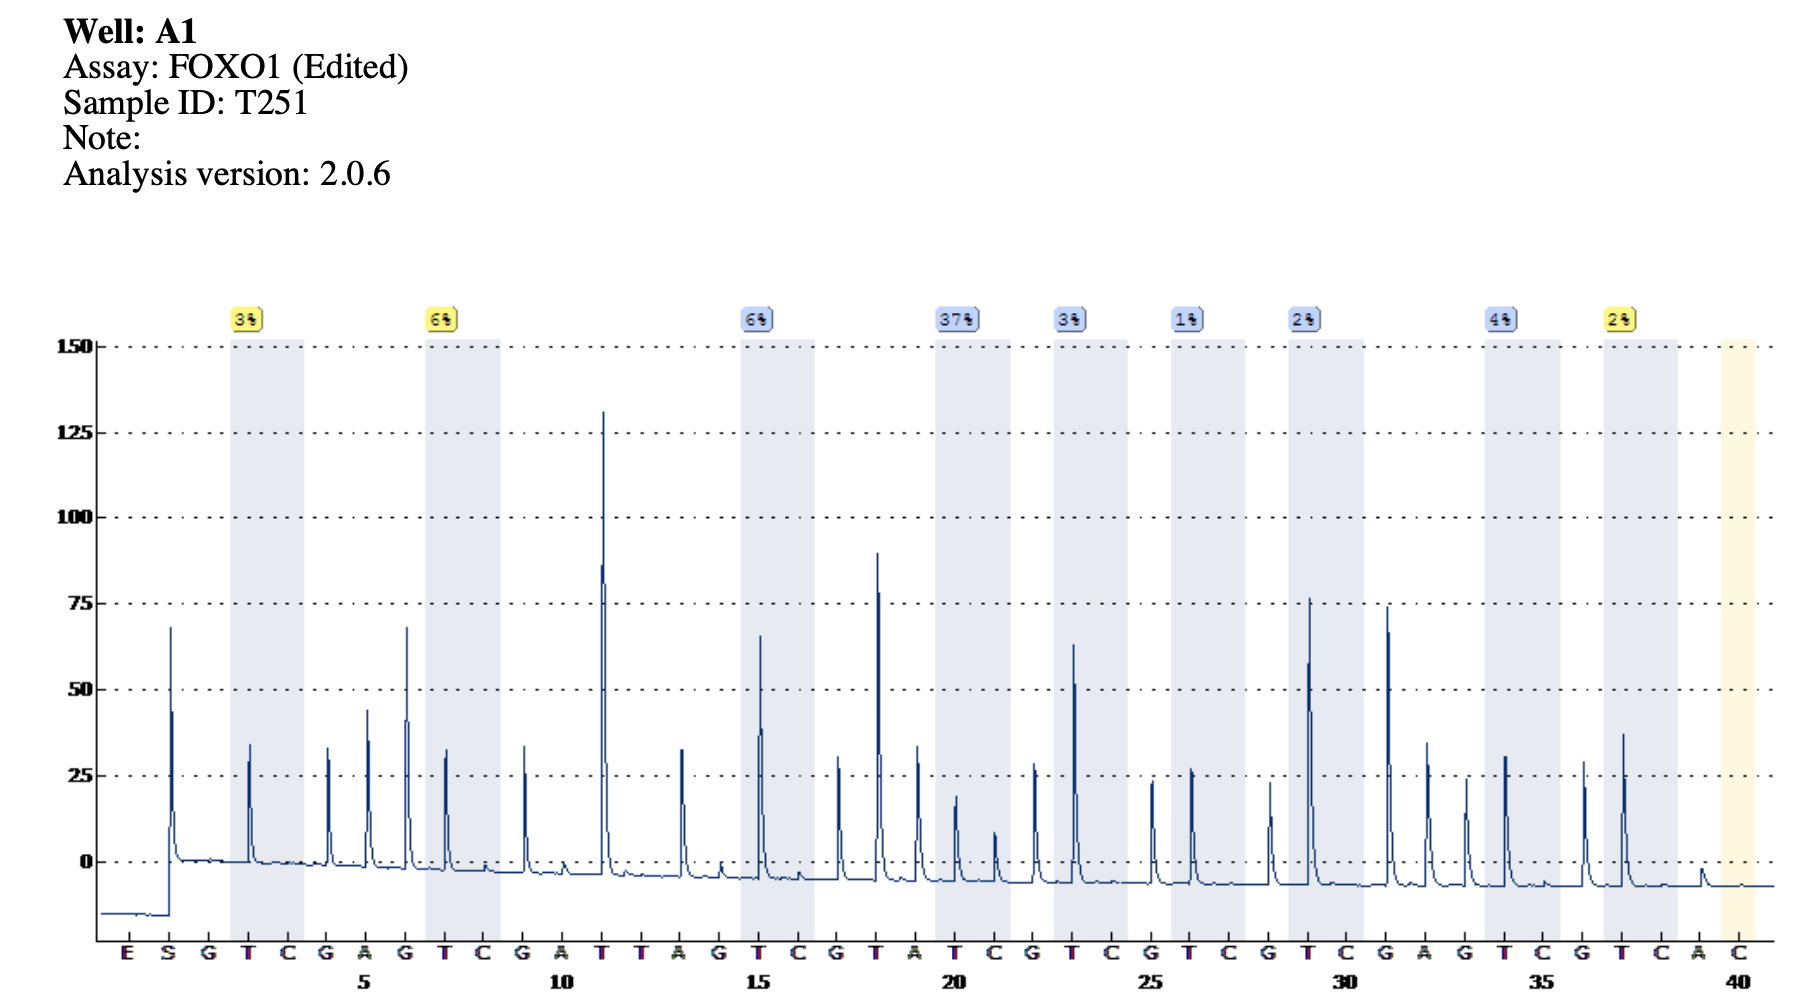
**

**Supplementary Figure 1.** Representative pyrogram results for each gene (A) *Igf1r*, (B) *Adipor1*, (C) *Foxo1*. All pyrogram results belong to the same sample.

**A.**


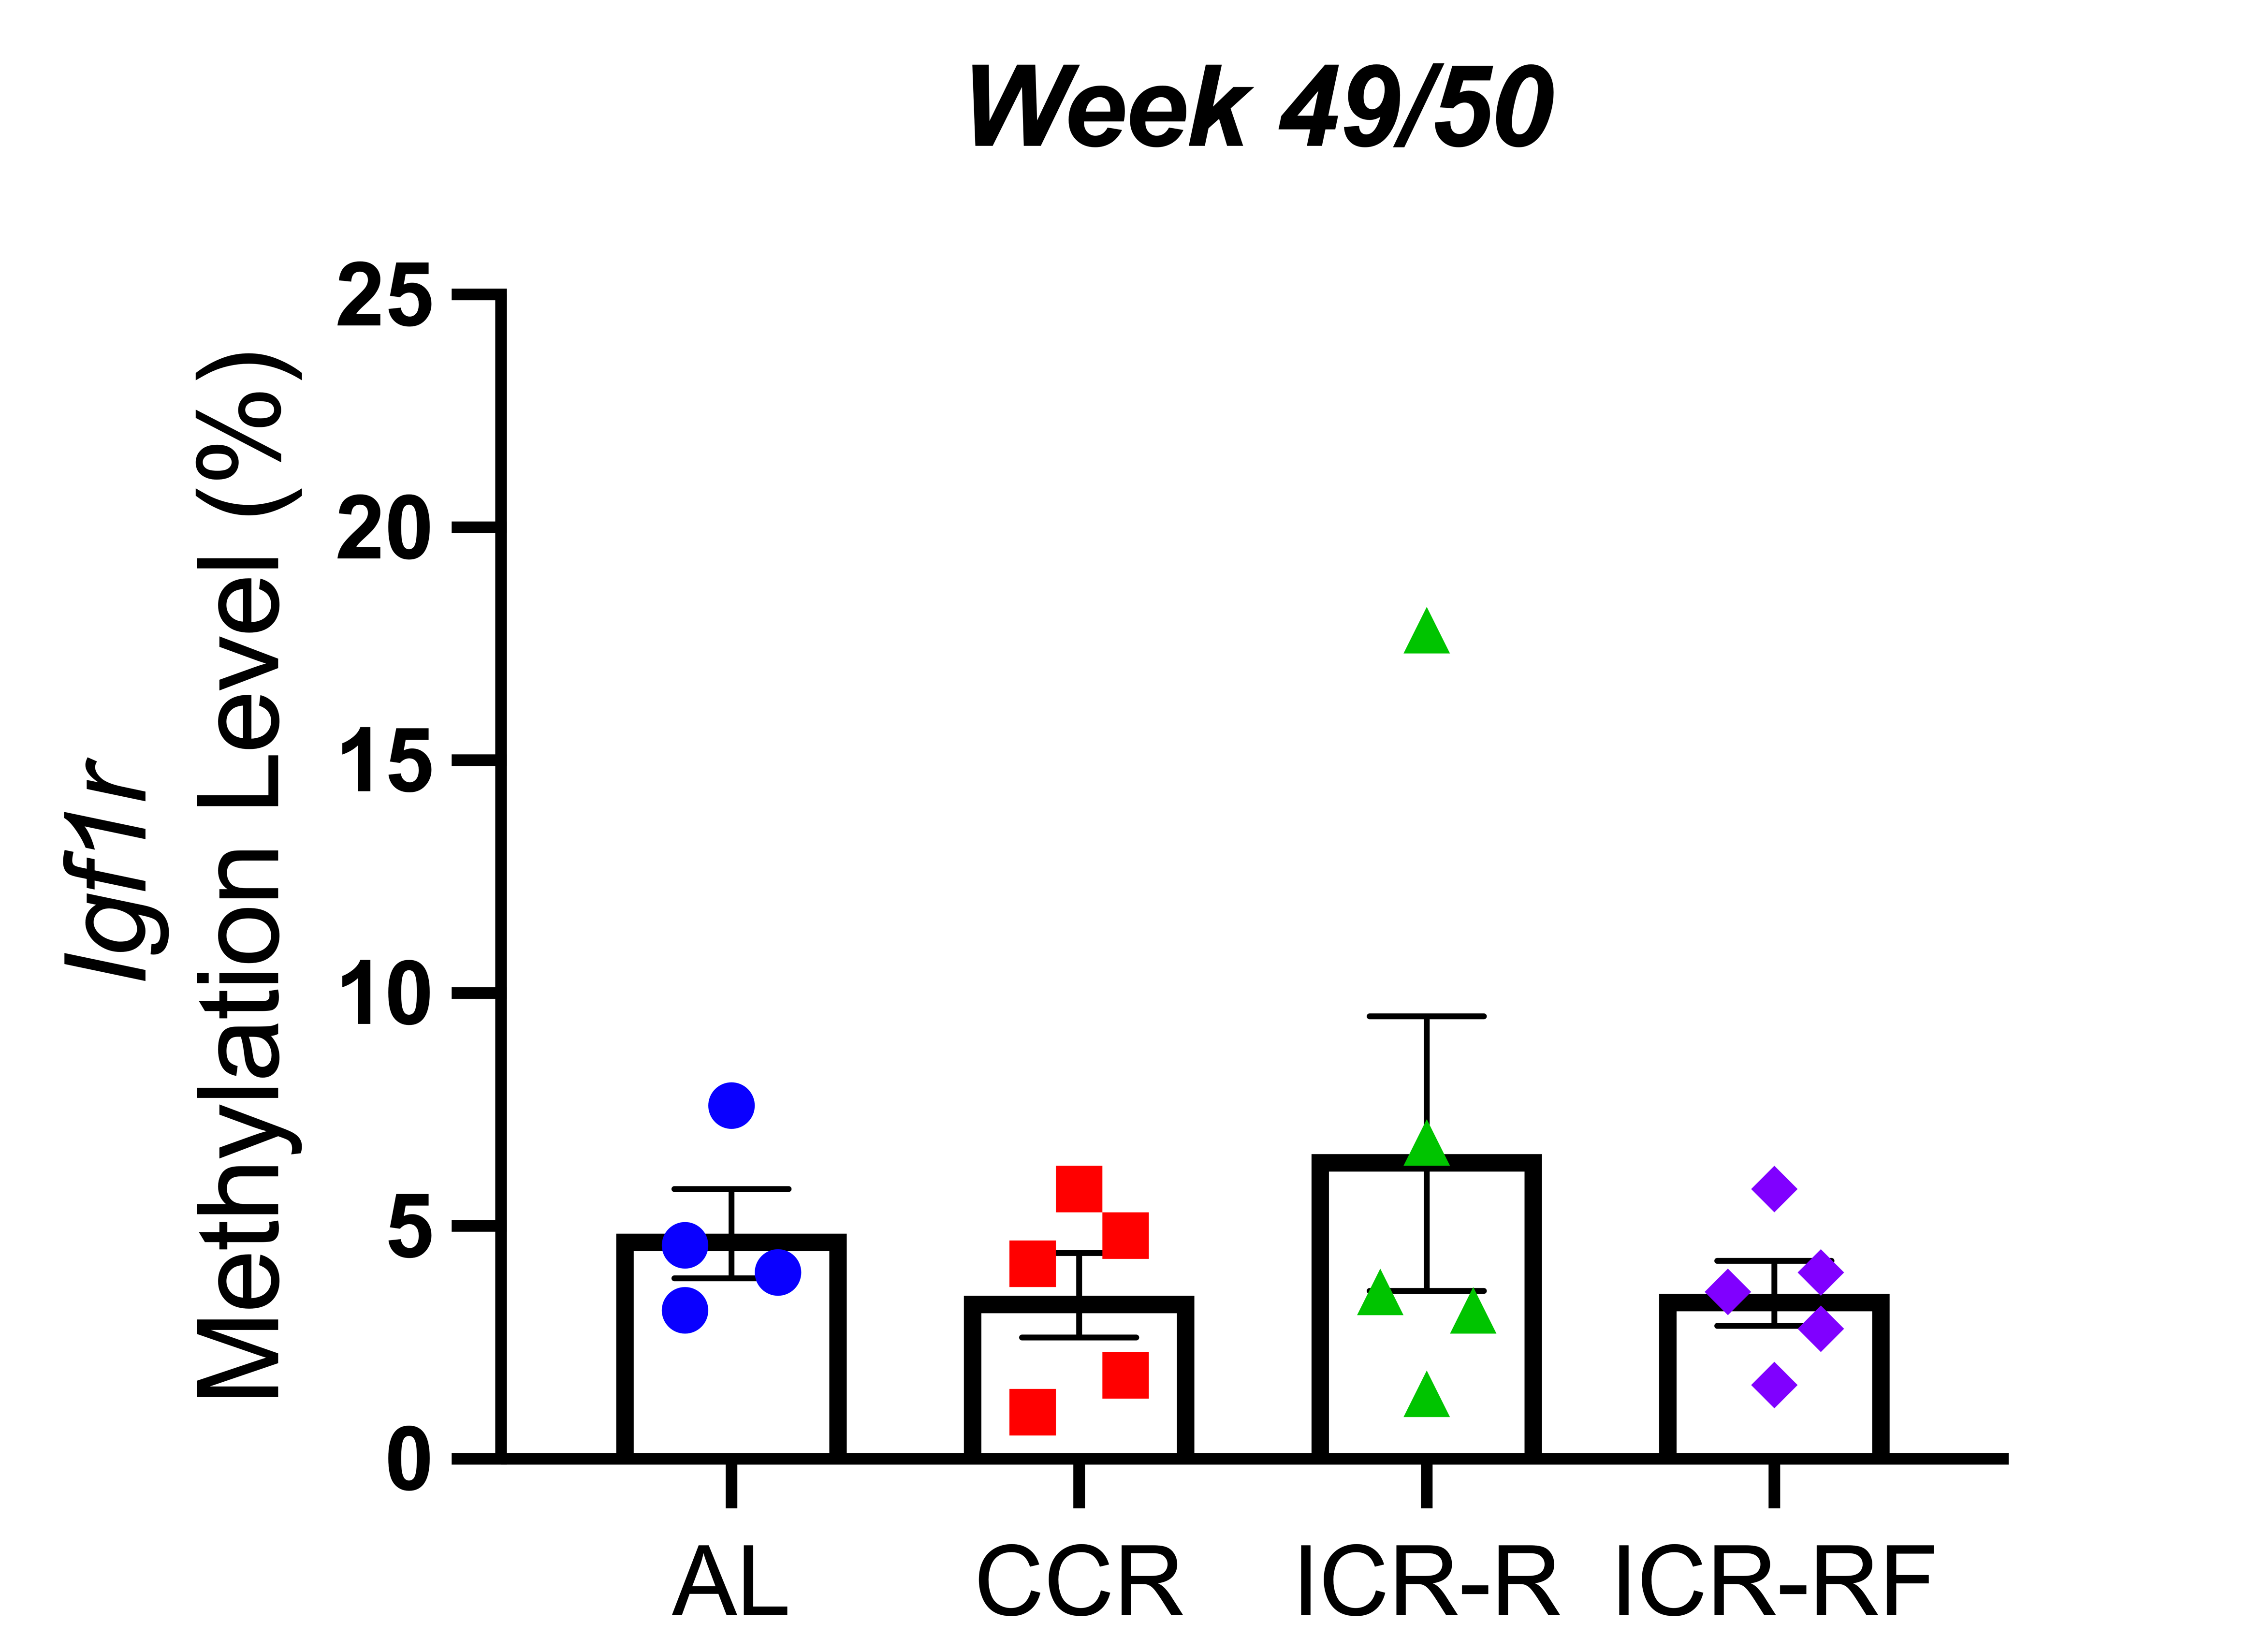

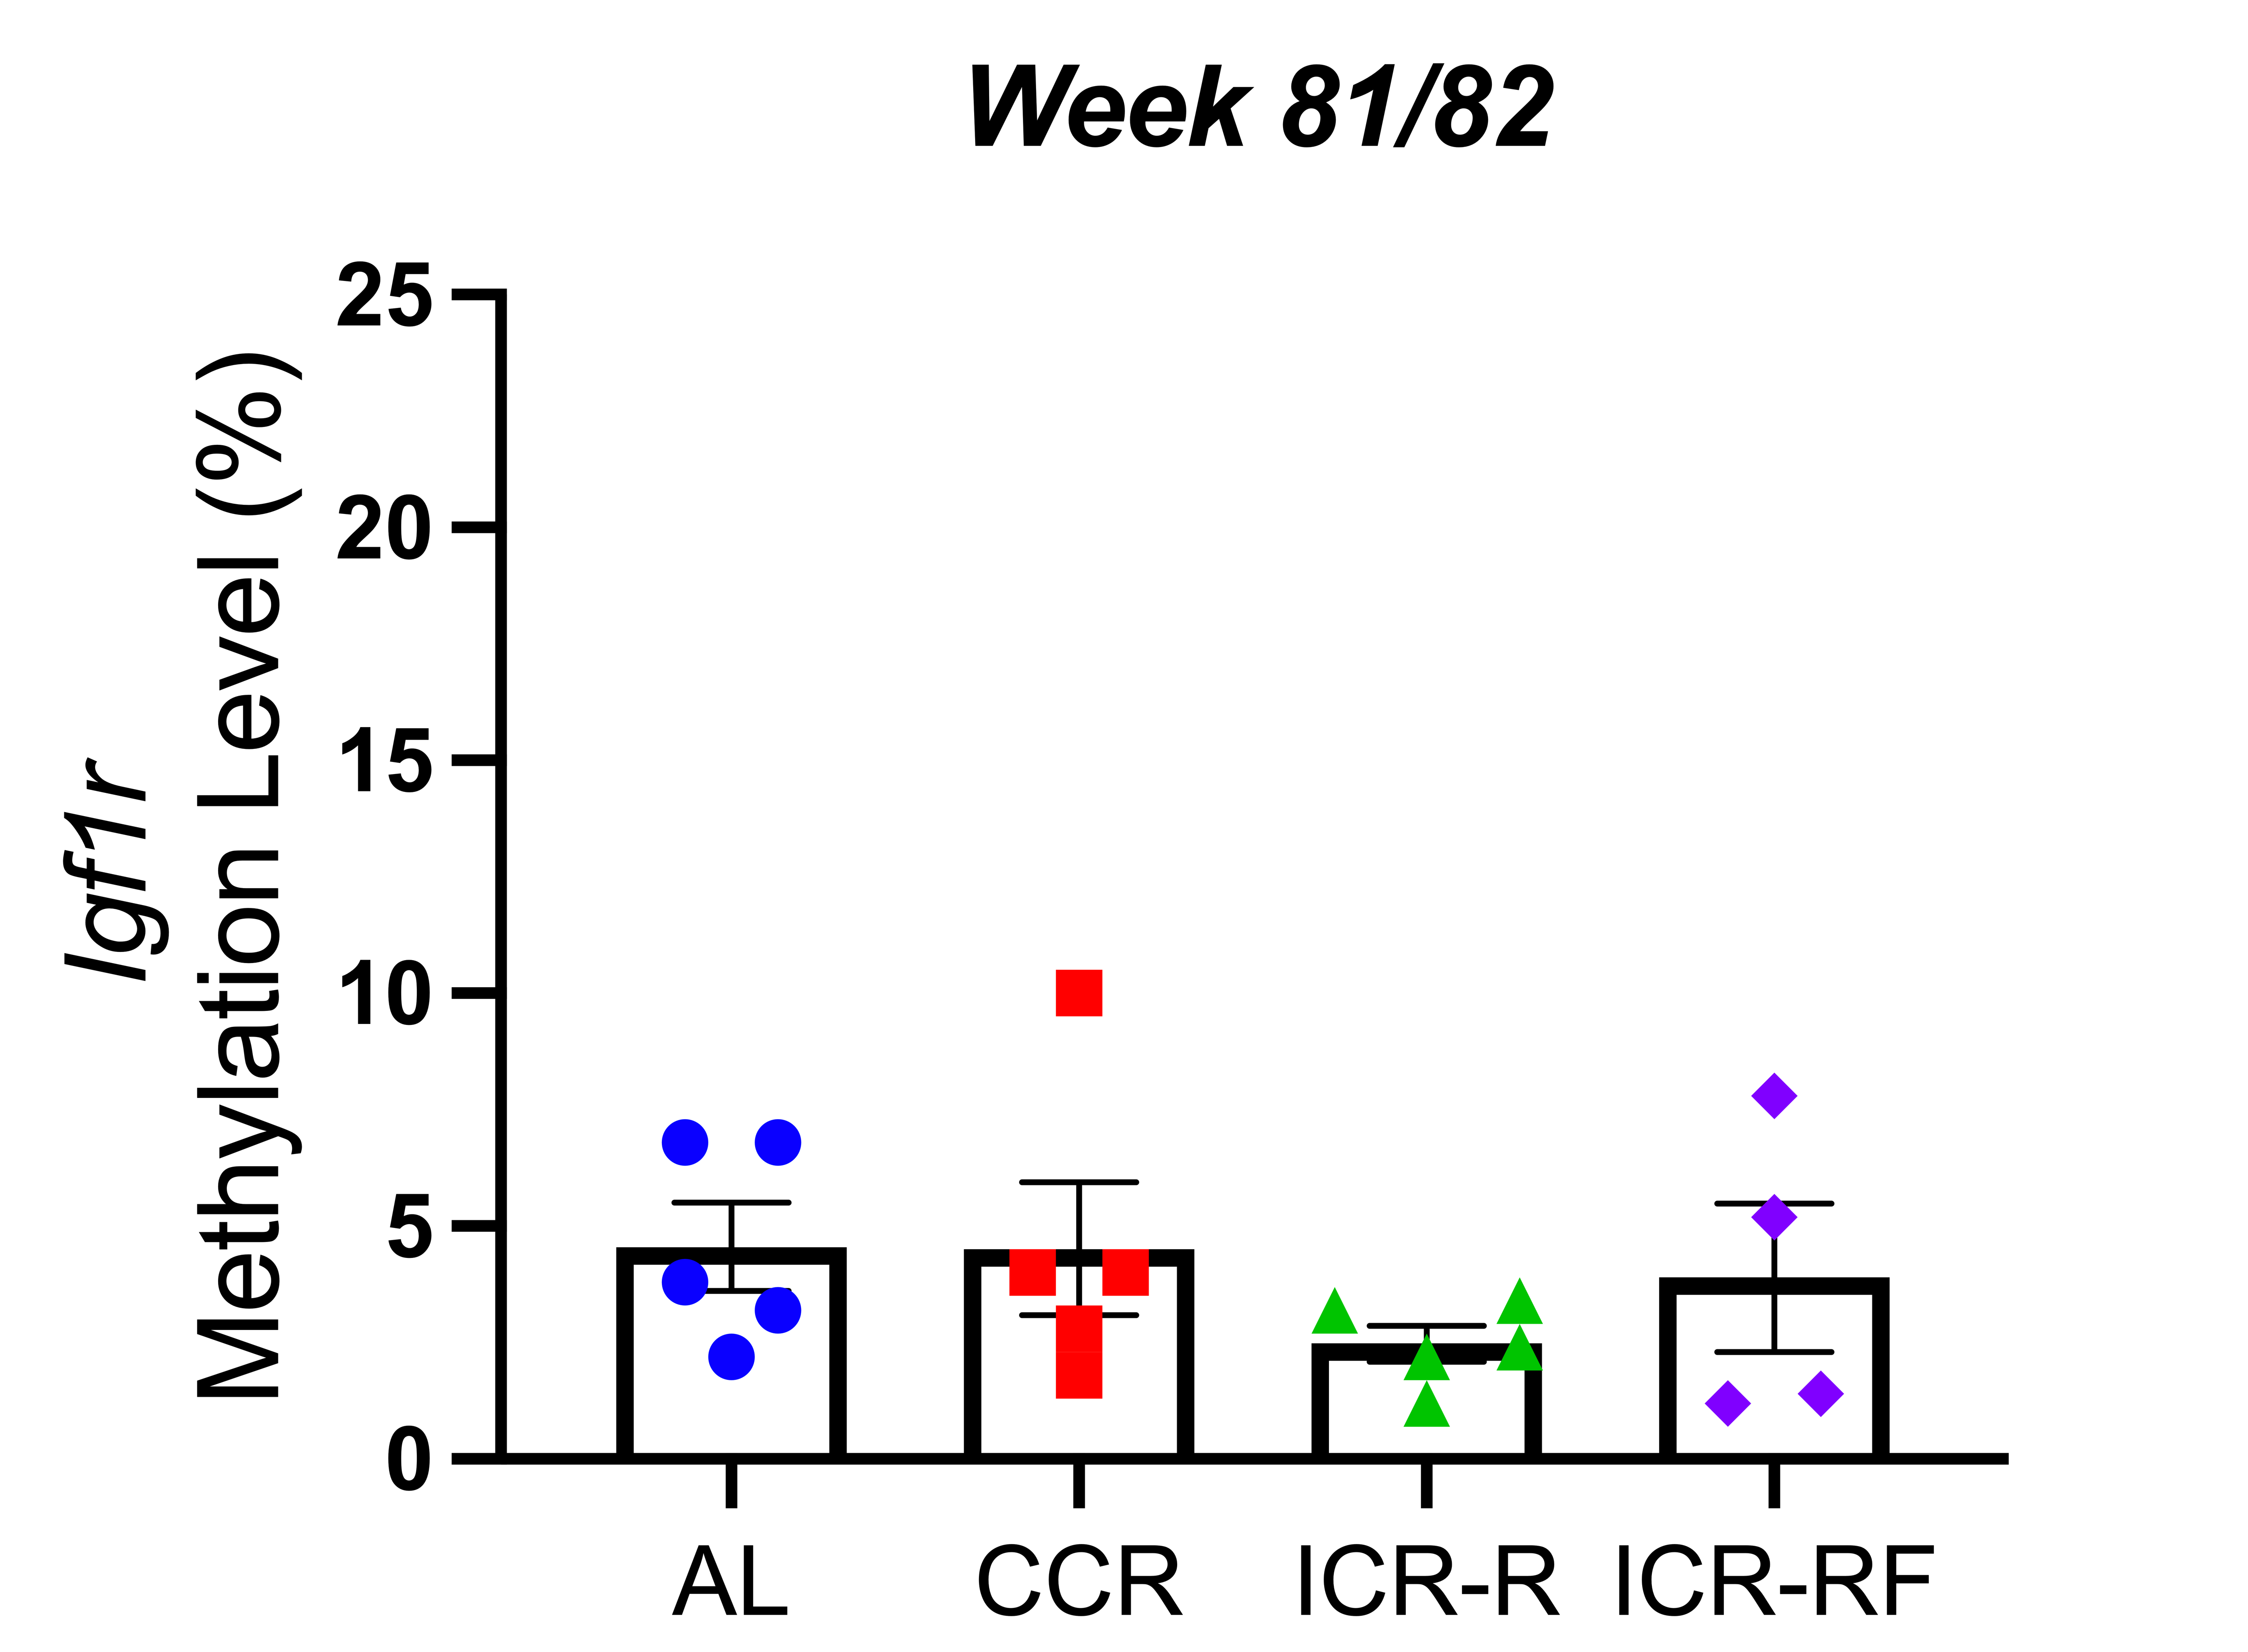


**B.**


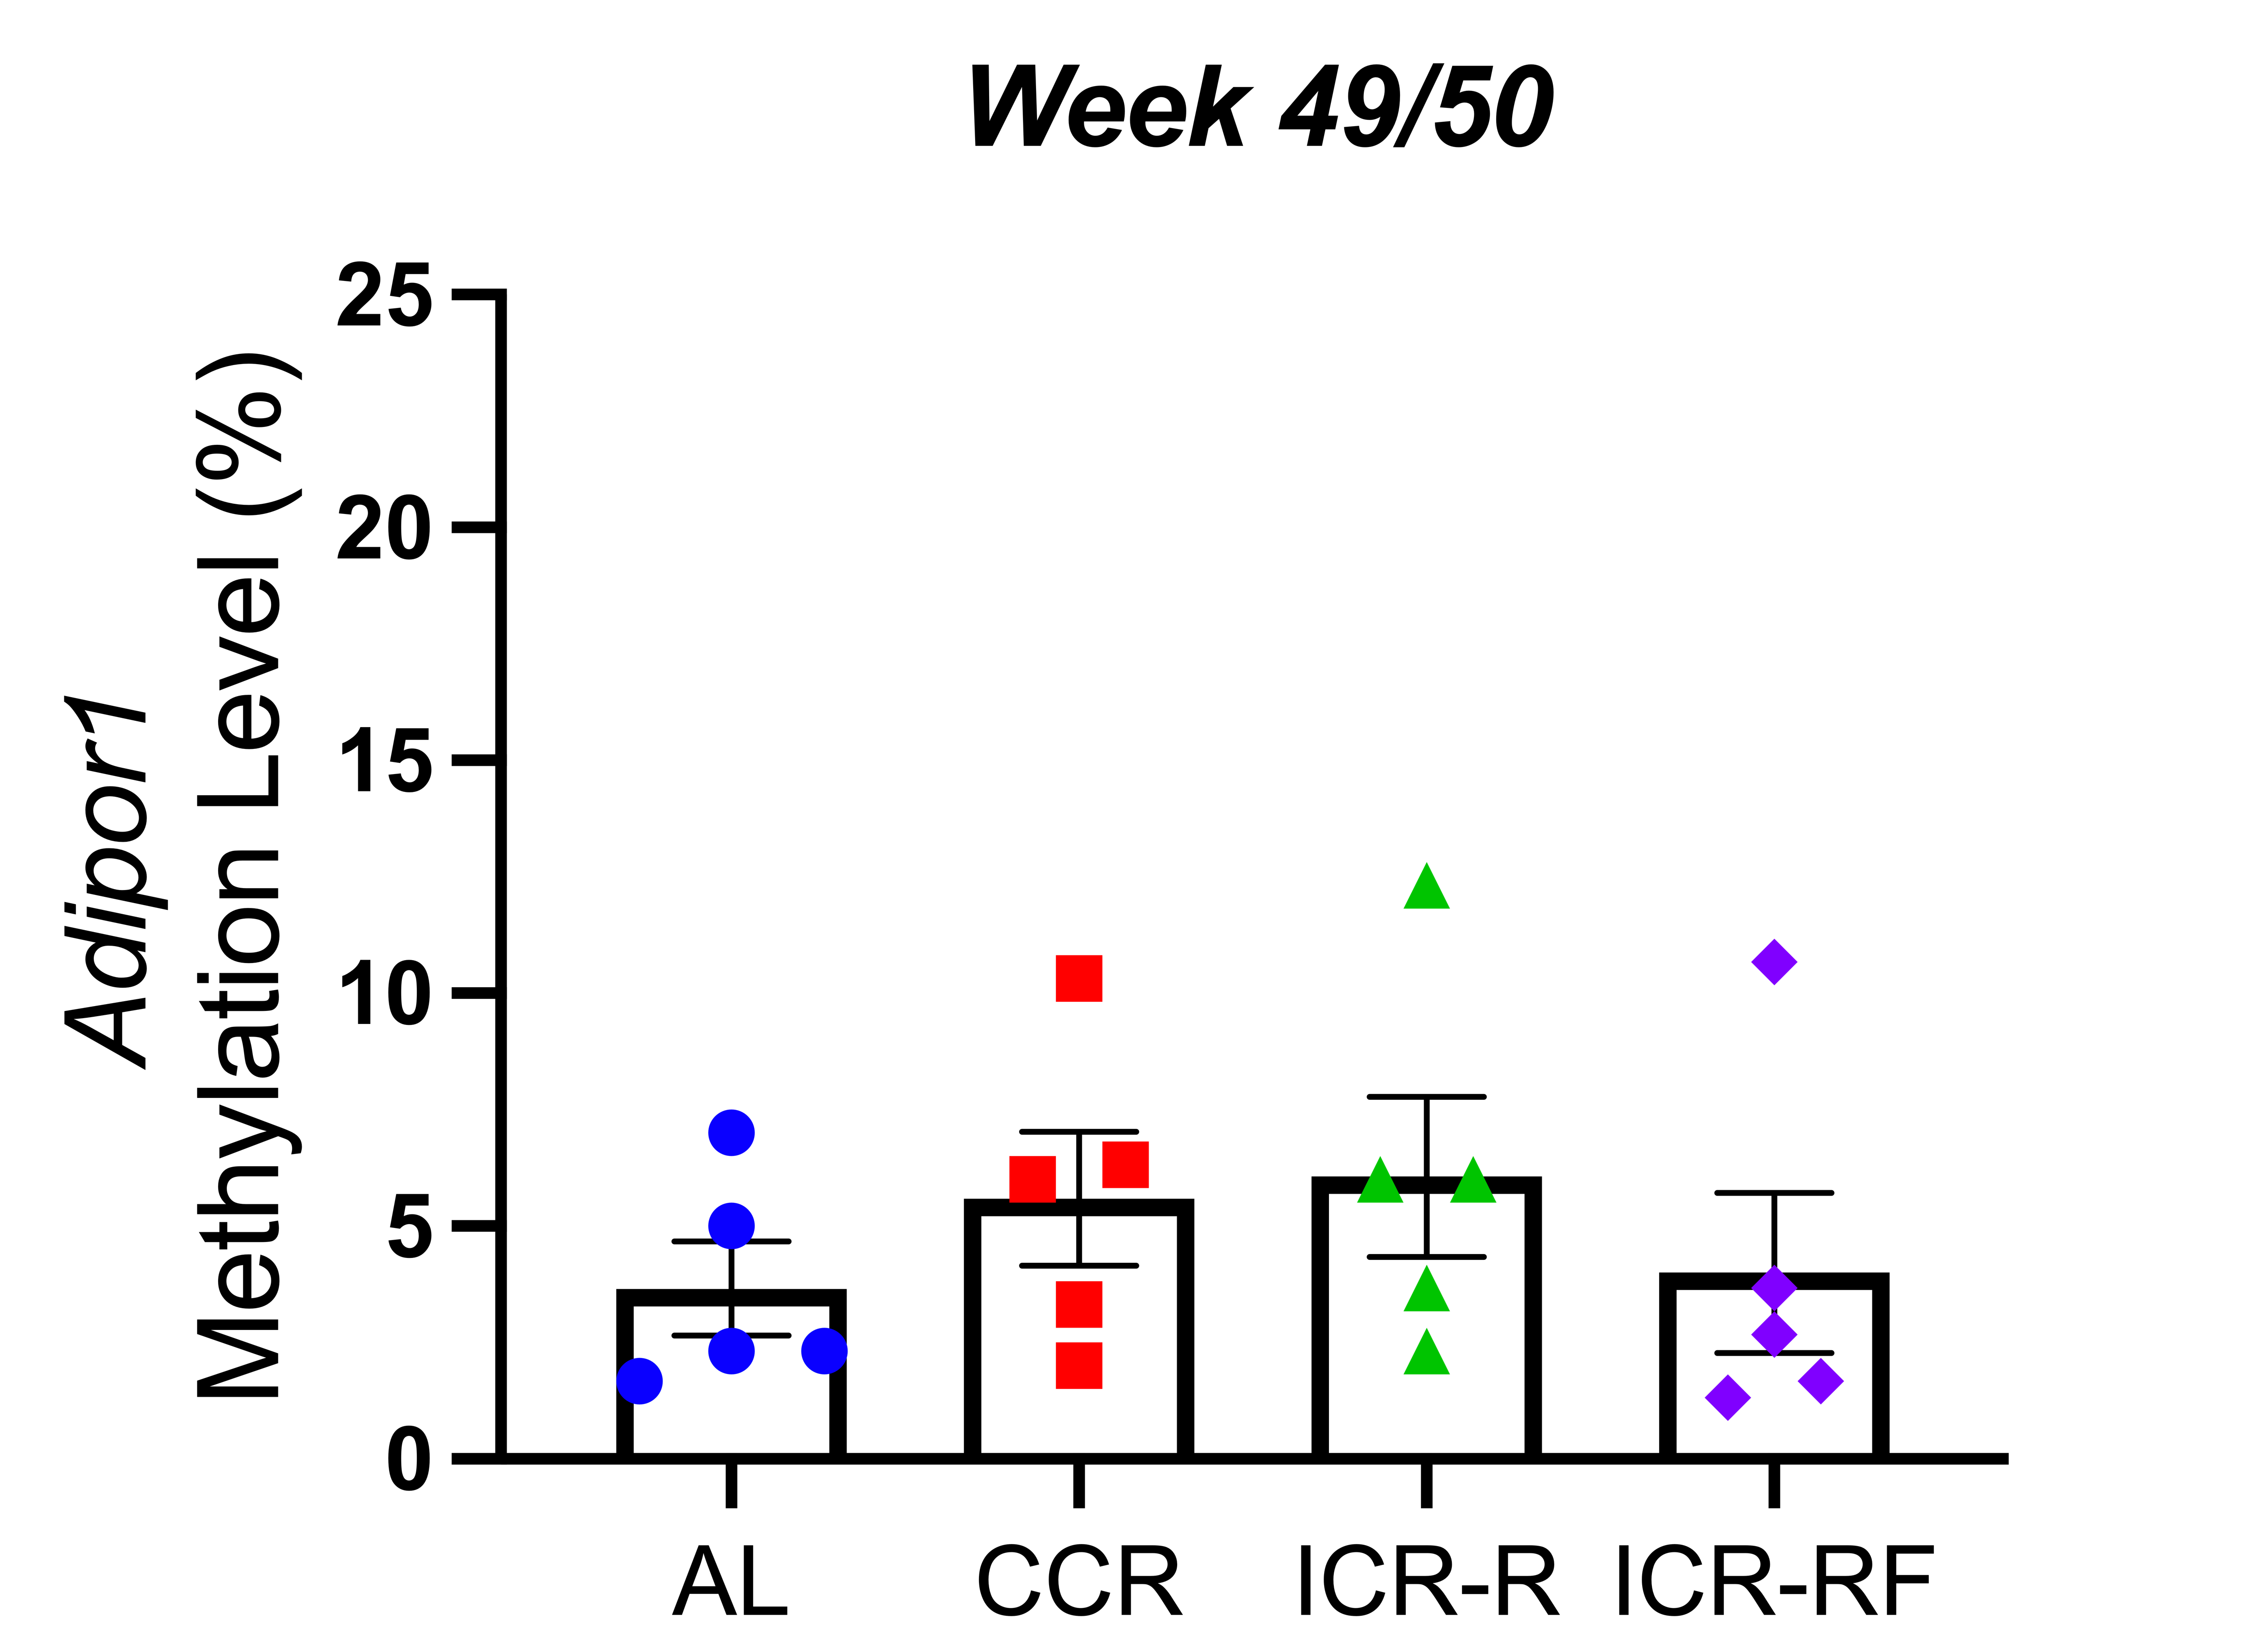

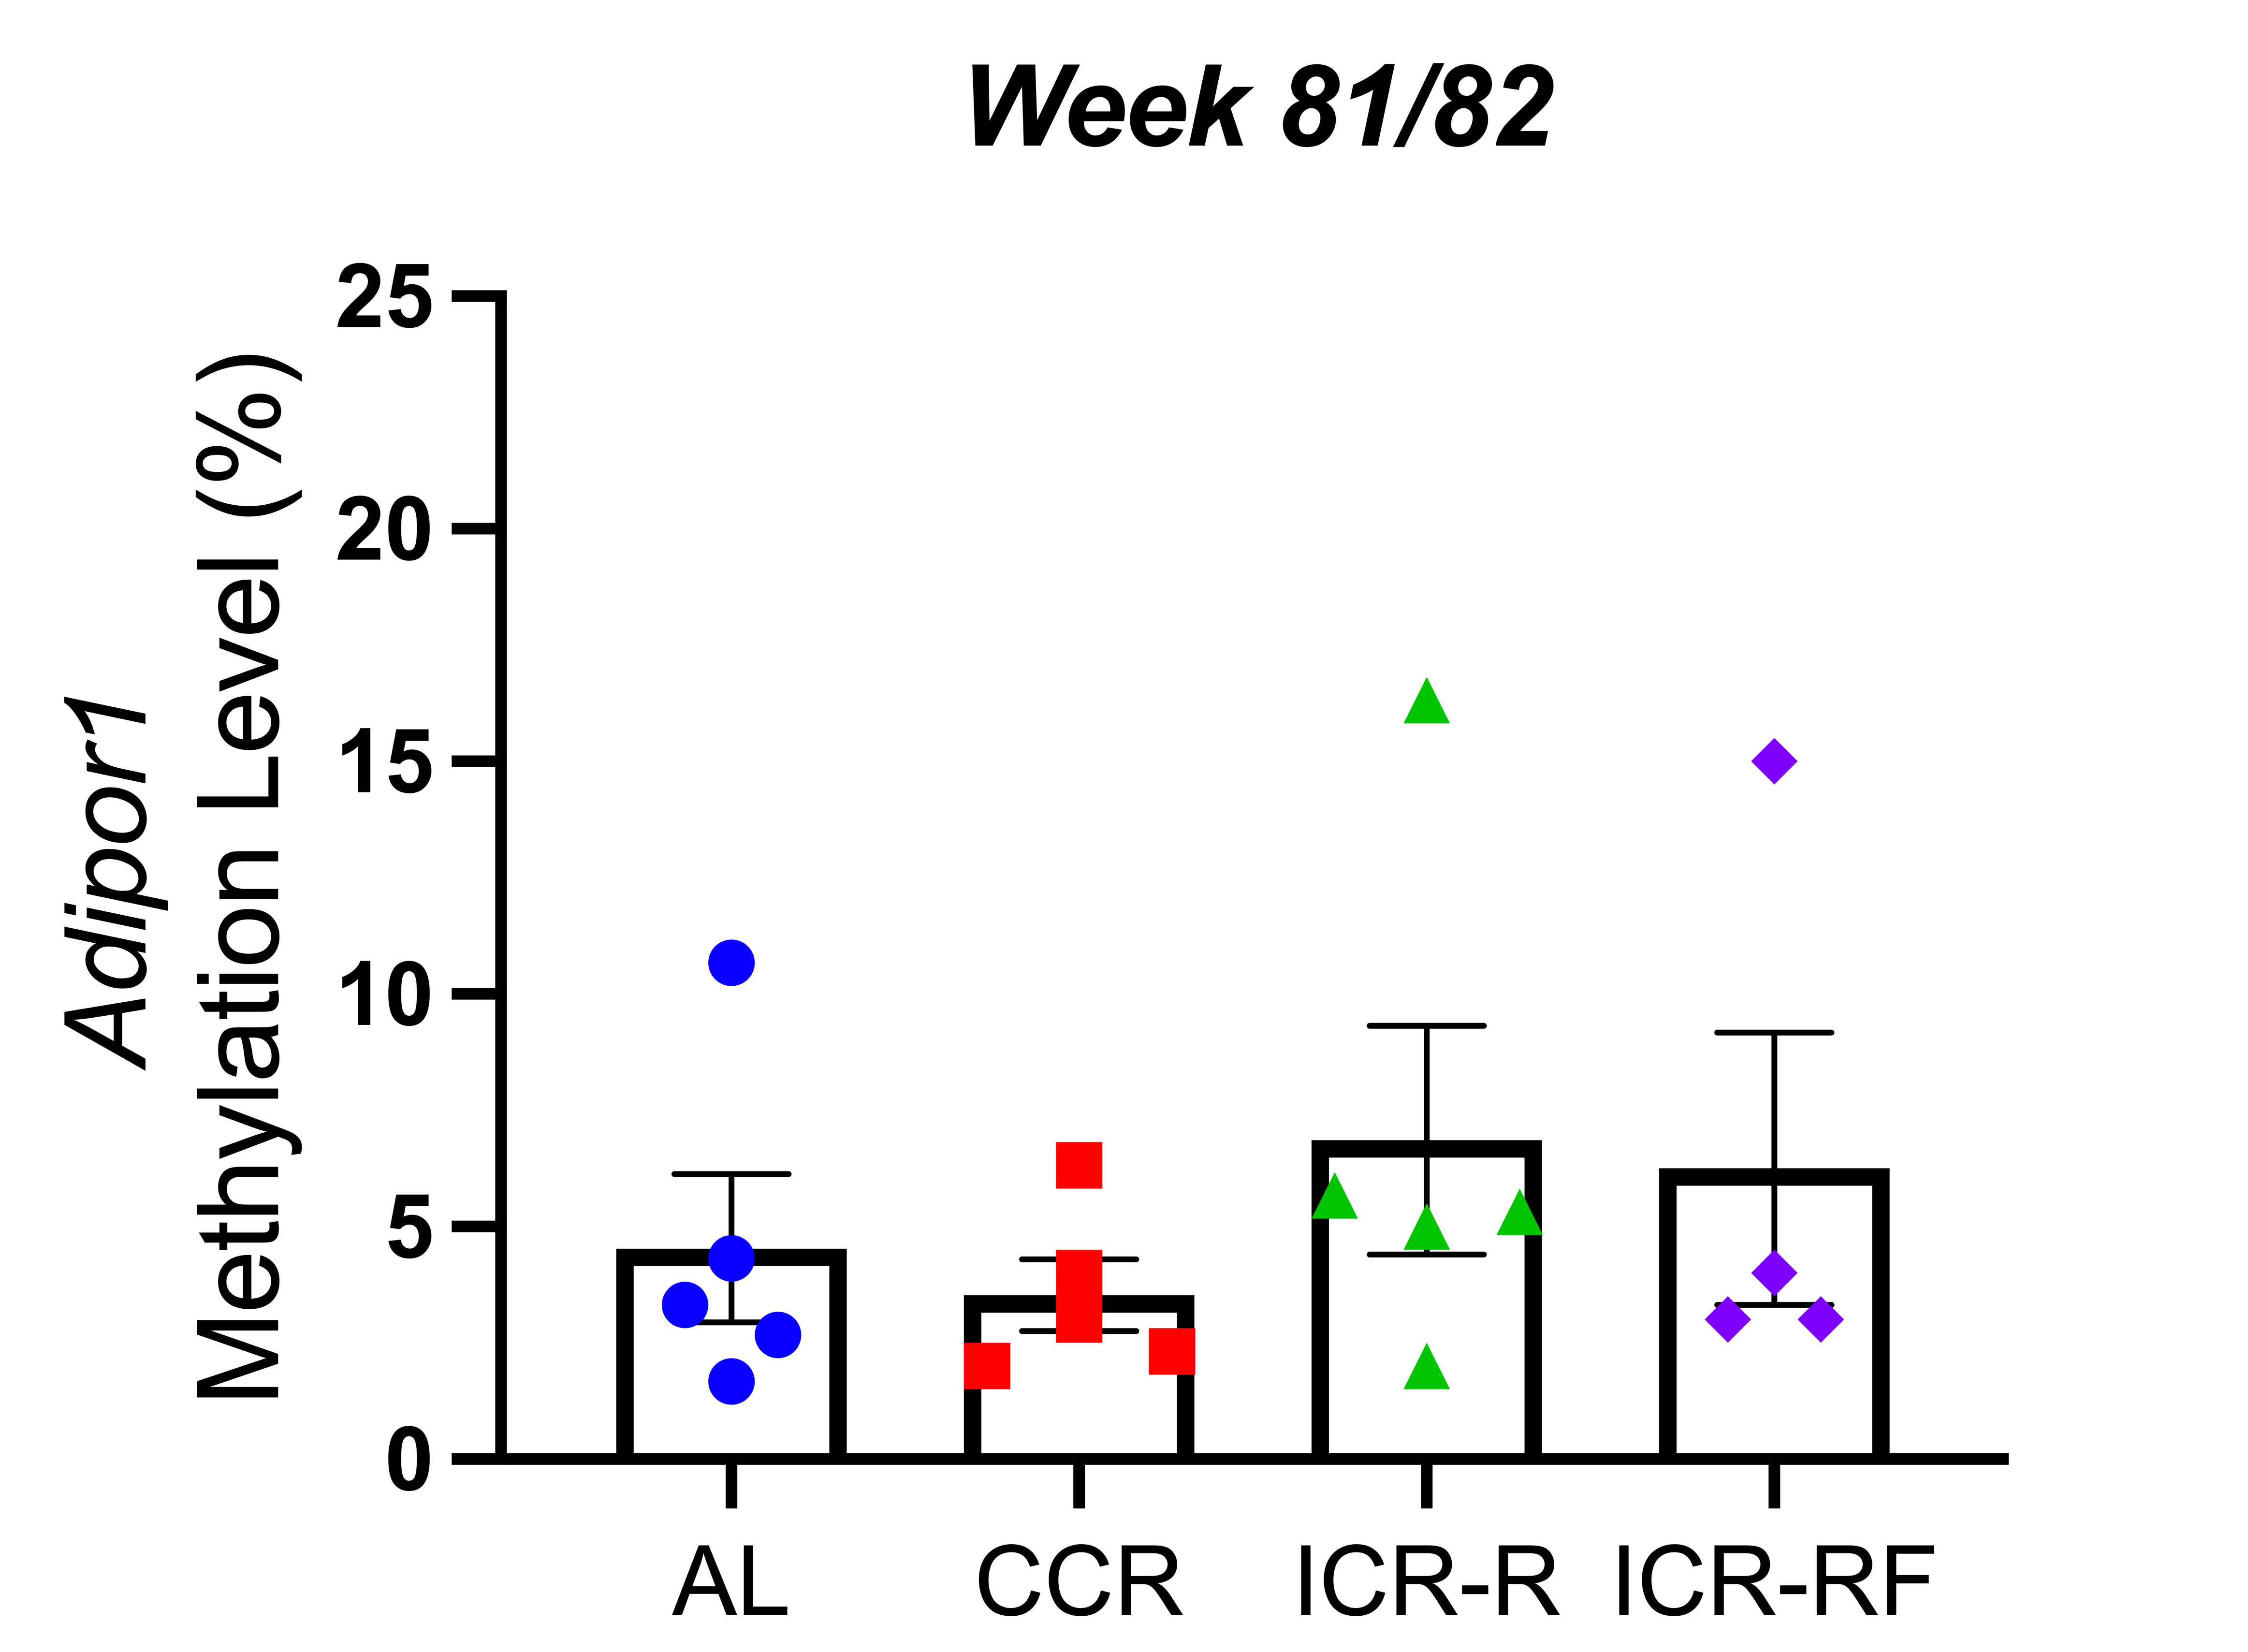


**C.**


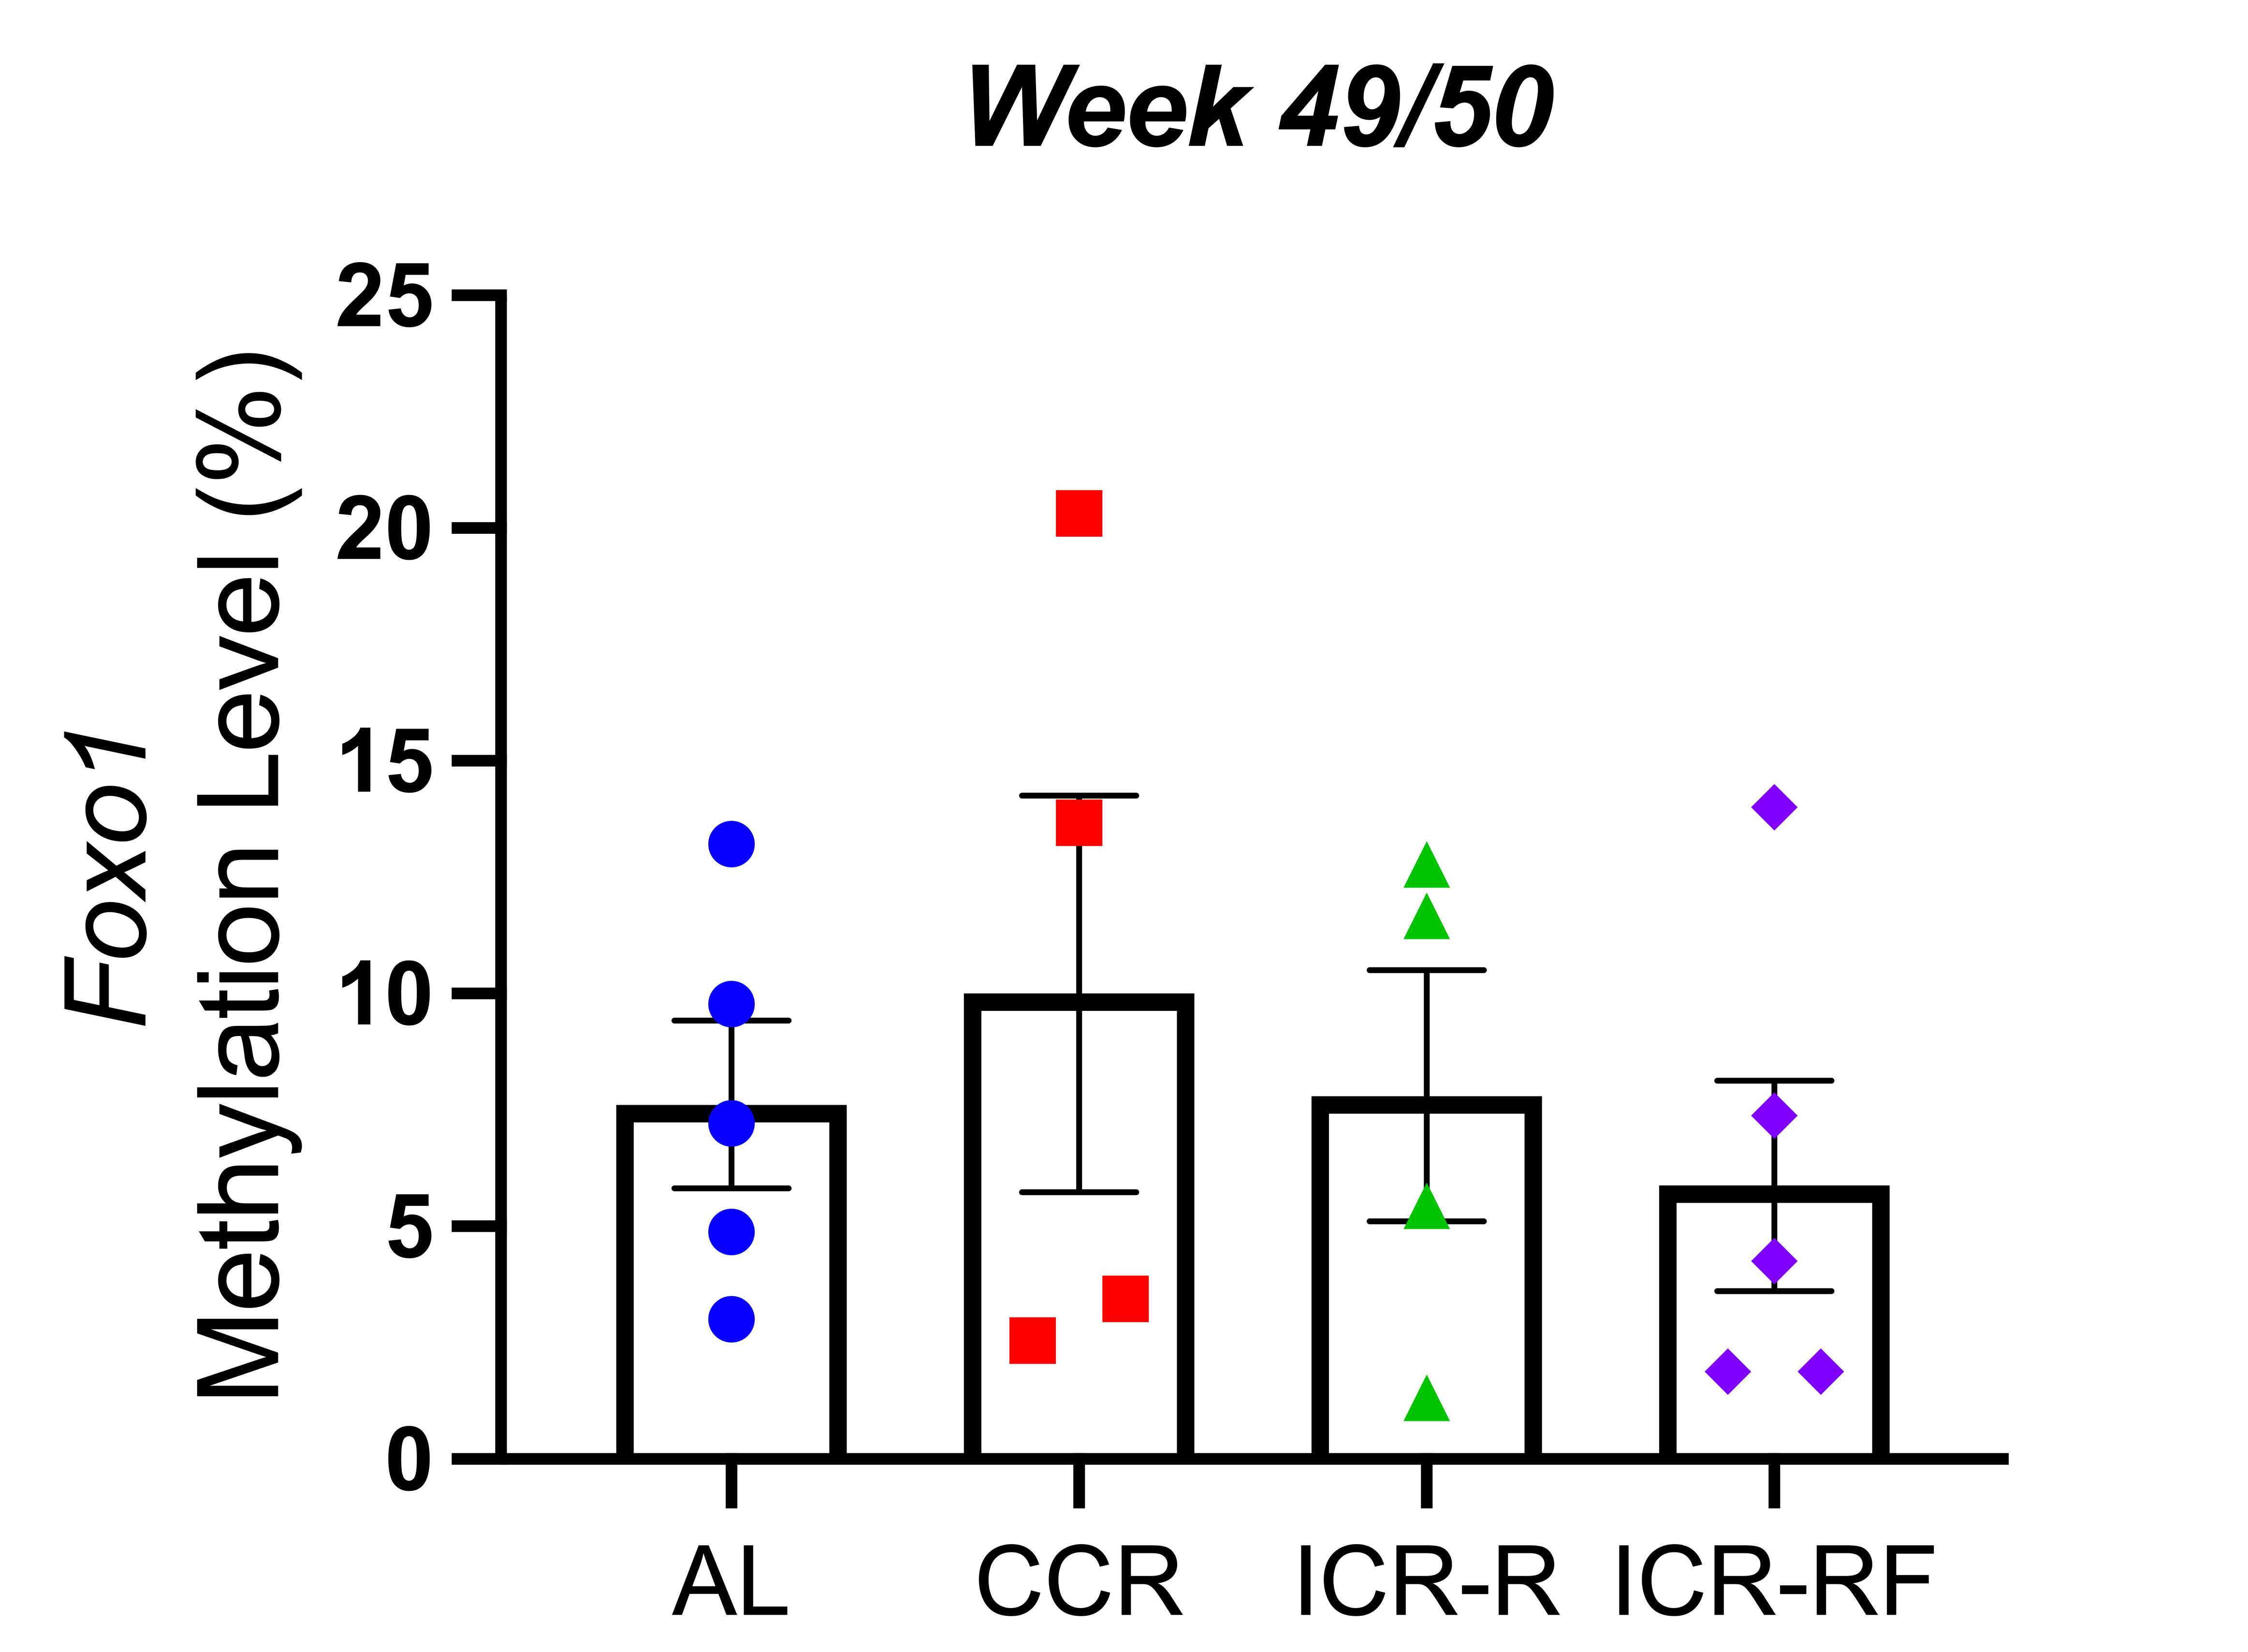

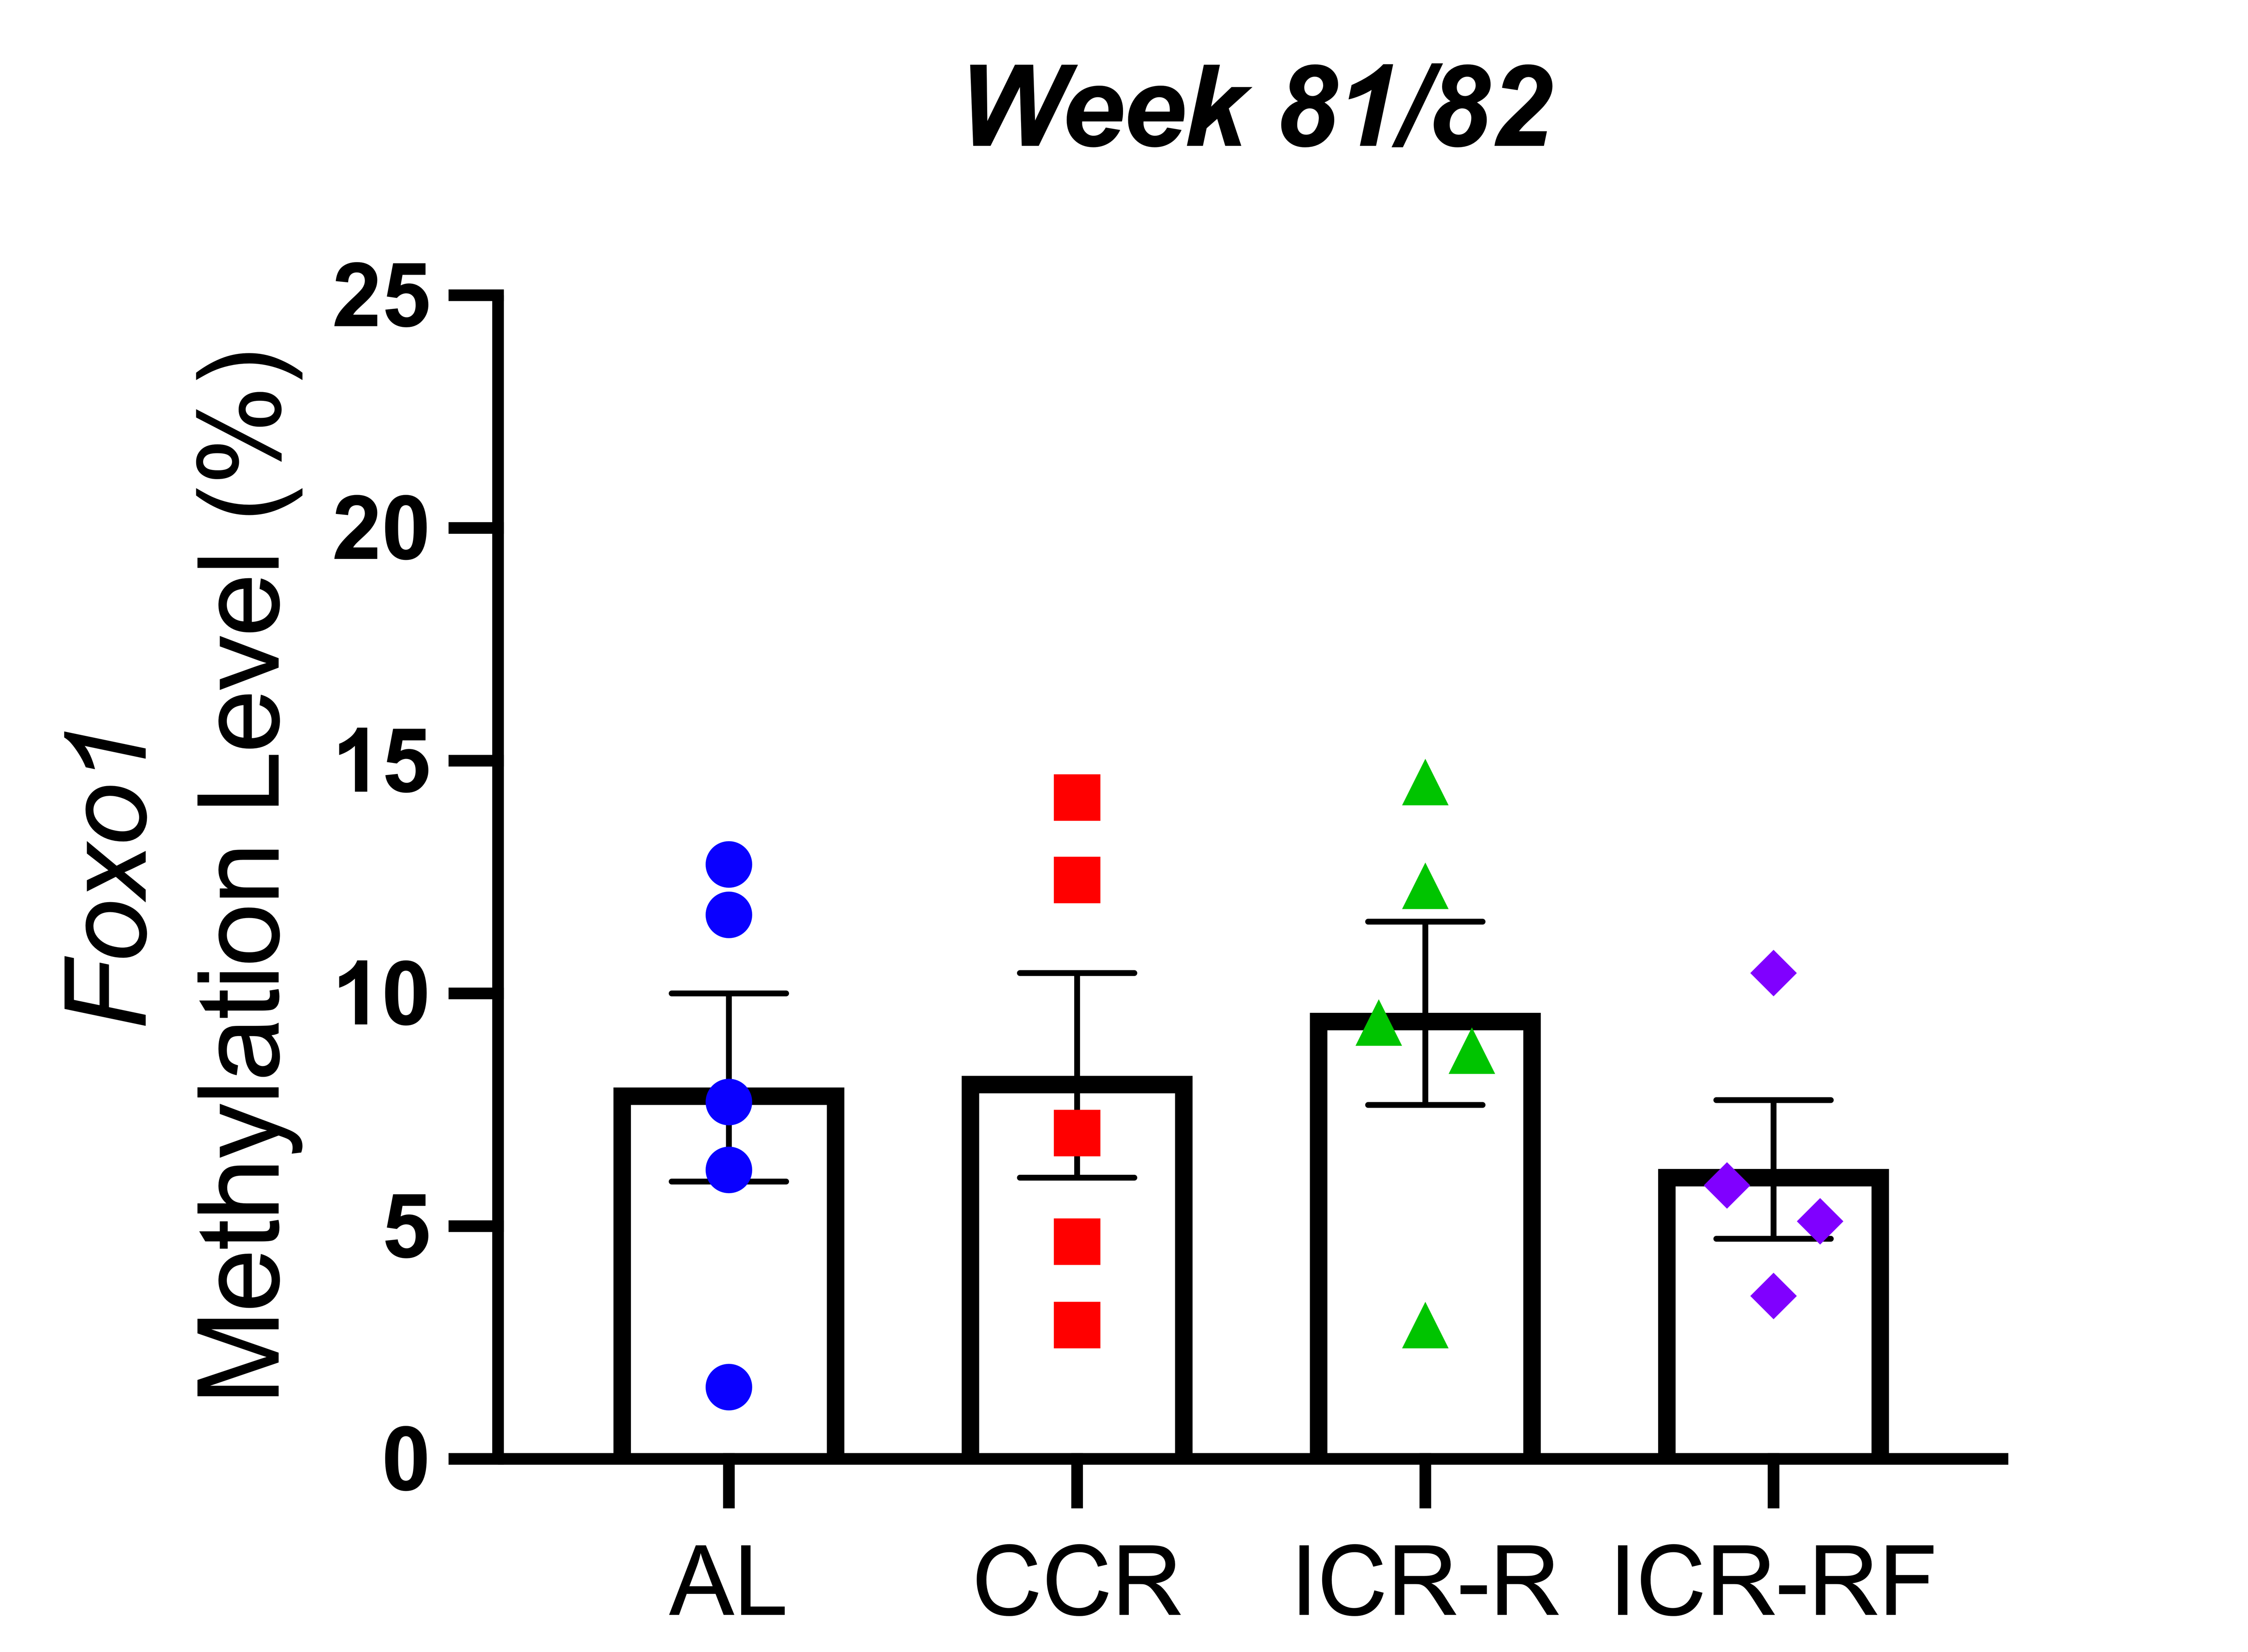


**Supplementary Figure 2.** The effects of different types of calorie restriction on the average promoter CpG site methylation of (A) *Igf1r*, (B) *Adipor1*, (C) *Foxo1* in aging mouse brain. Mean ± SEM are presented for each group, n=4-5 biological replicates. Statistical significance determined using one-way ANOVA.


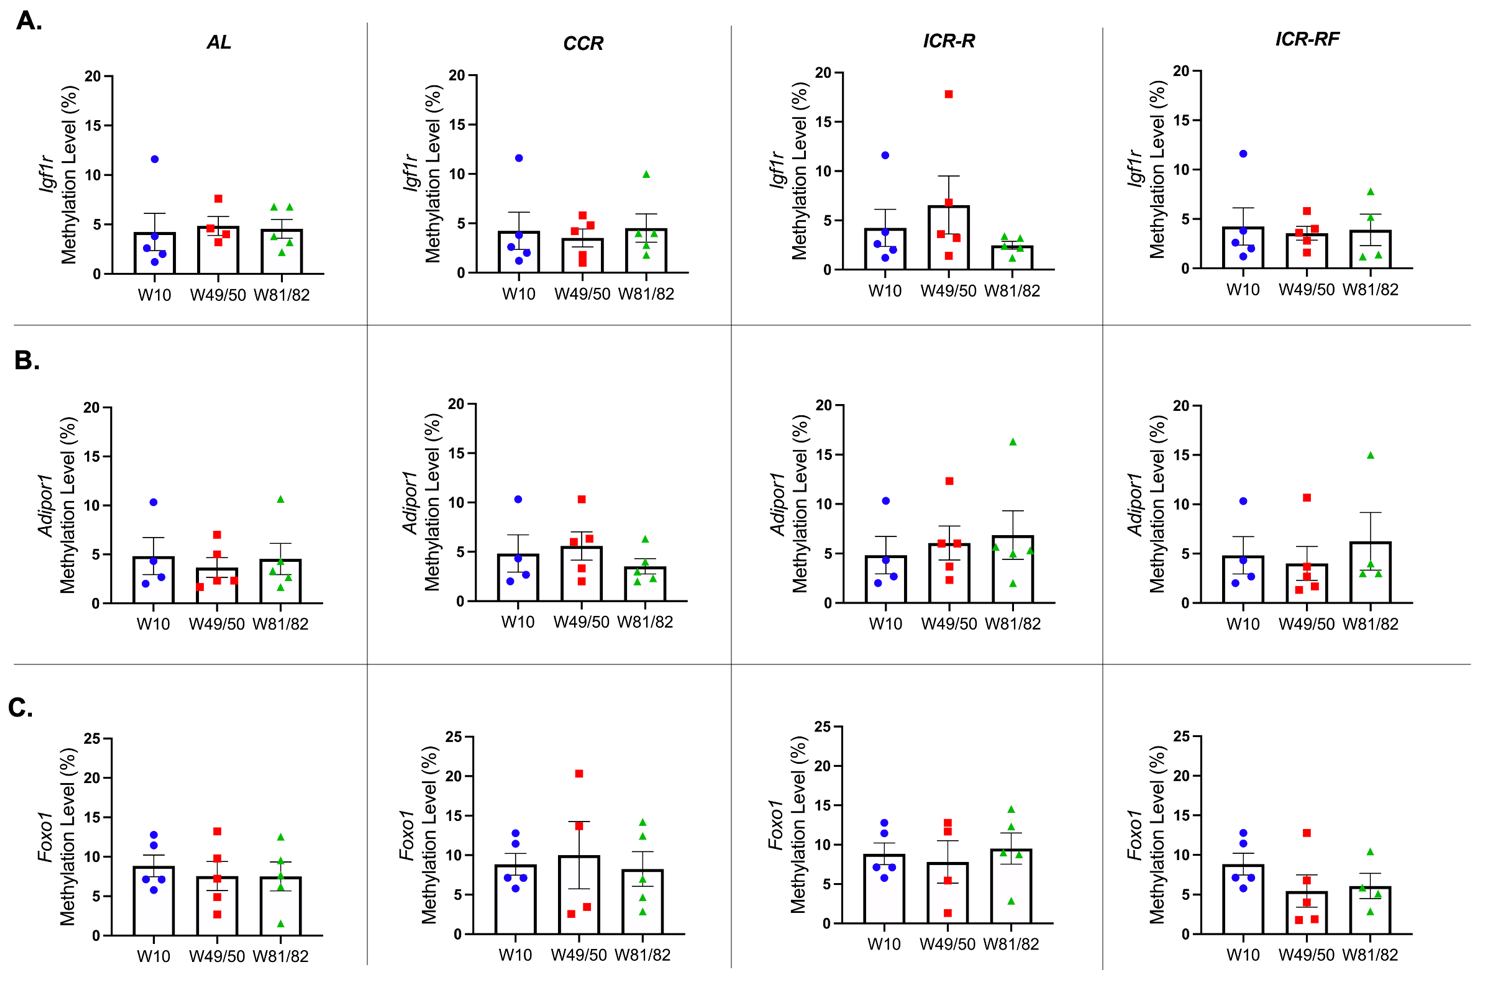


**Supplementary Figure 3.** The effects of aging on the average promoter CpG site methylation of (A) *Igf1r*, (B) *Adipor1*, (C) *Foxo1* promoter in mouse brain. Mean ± SEM are presented for each group, n=4-5 biological replicates. Statistical significance determined using one-way ANOVA.

**A.**


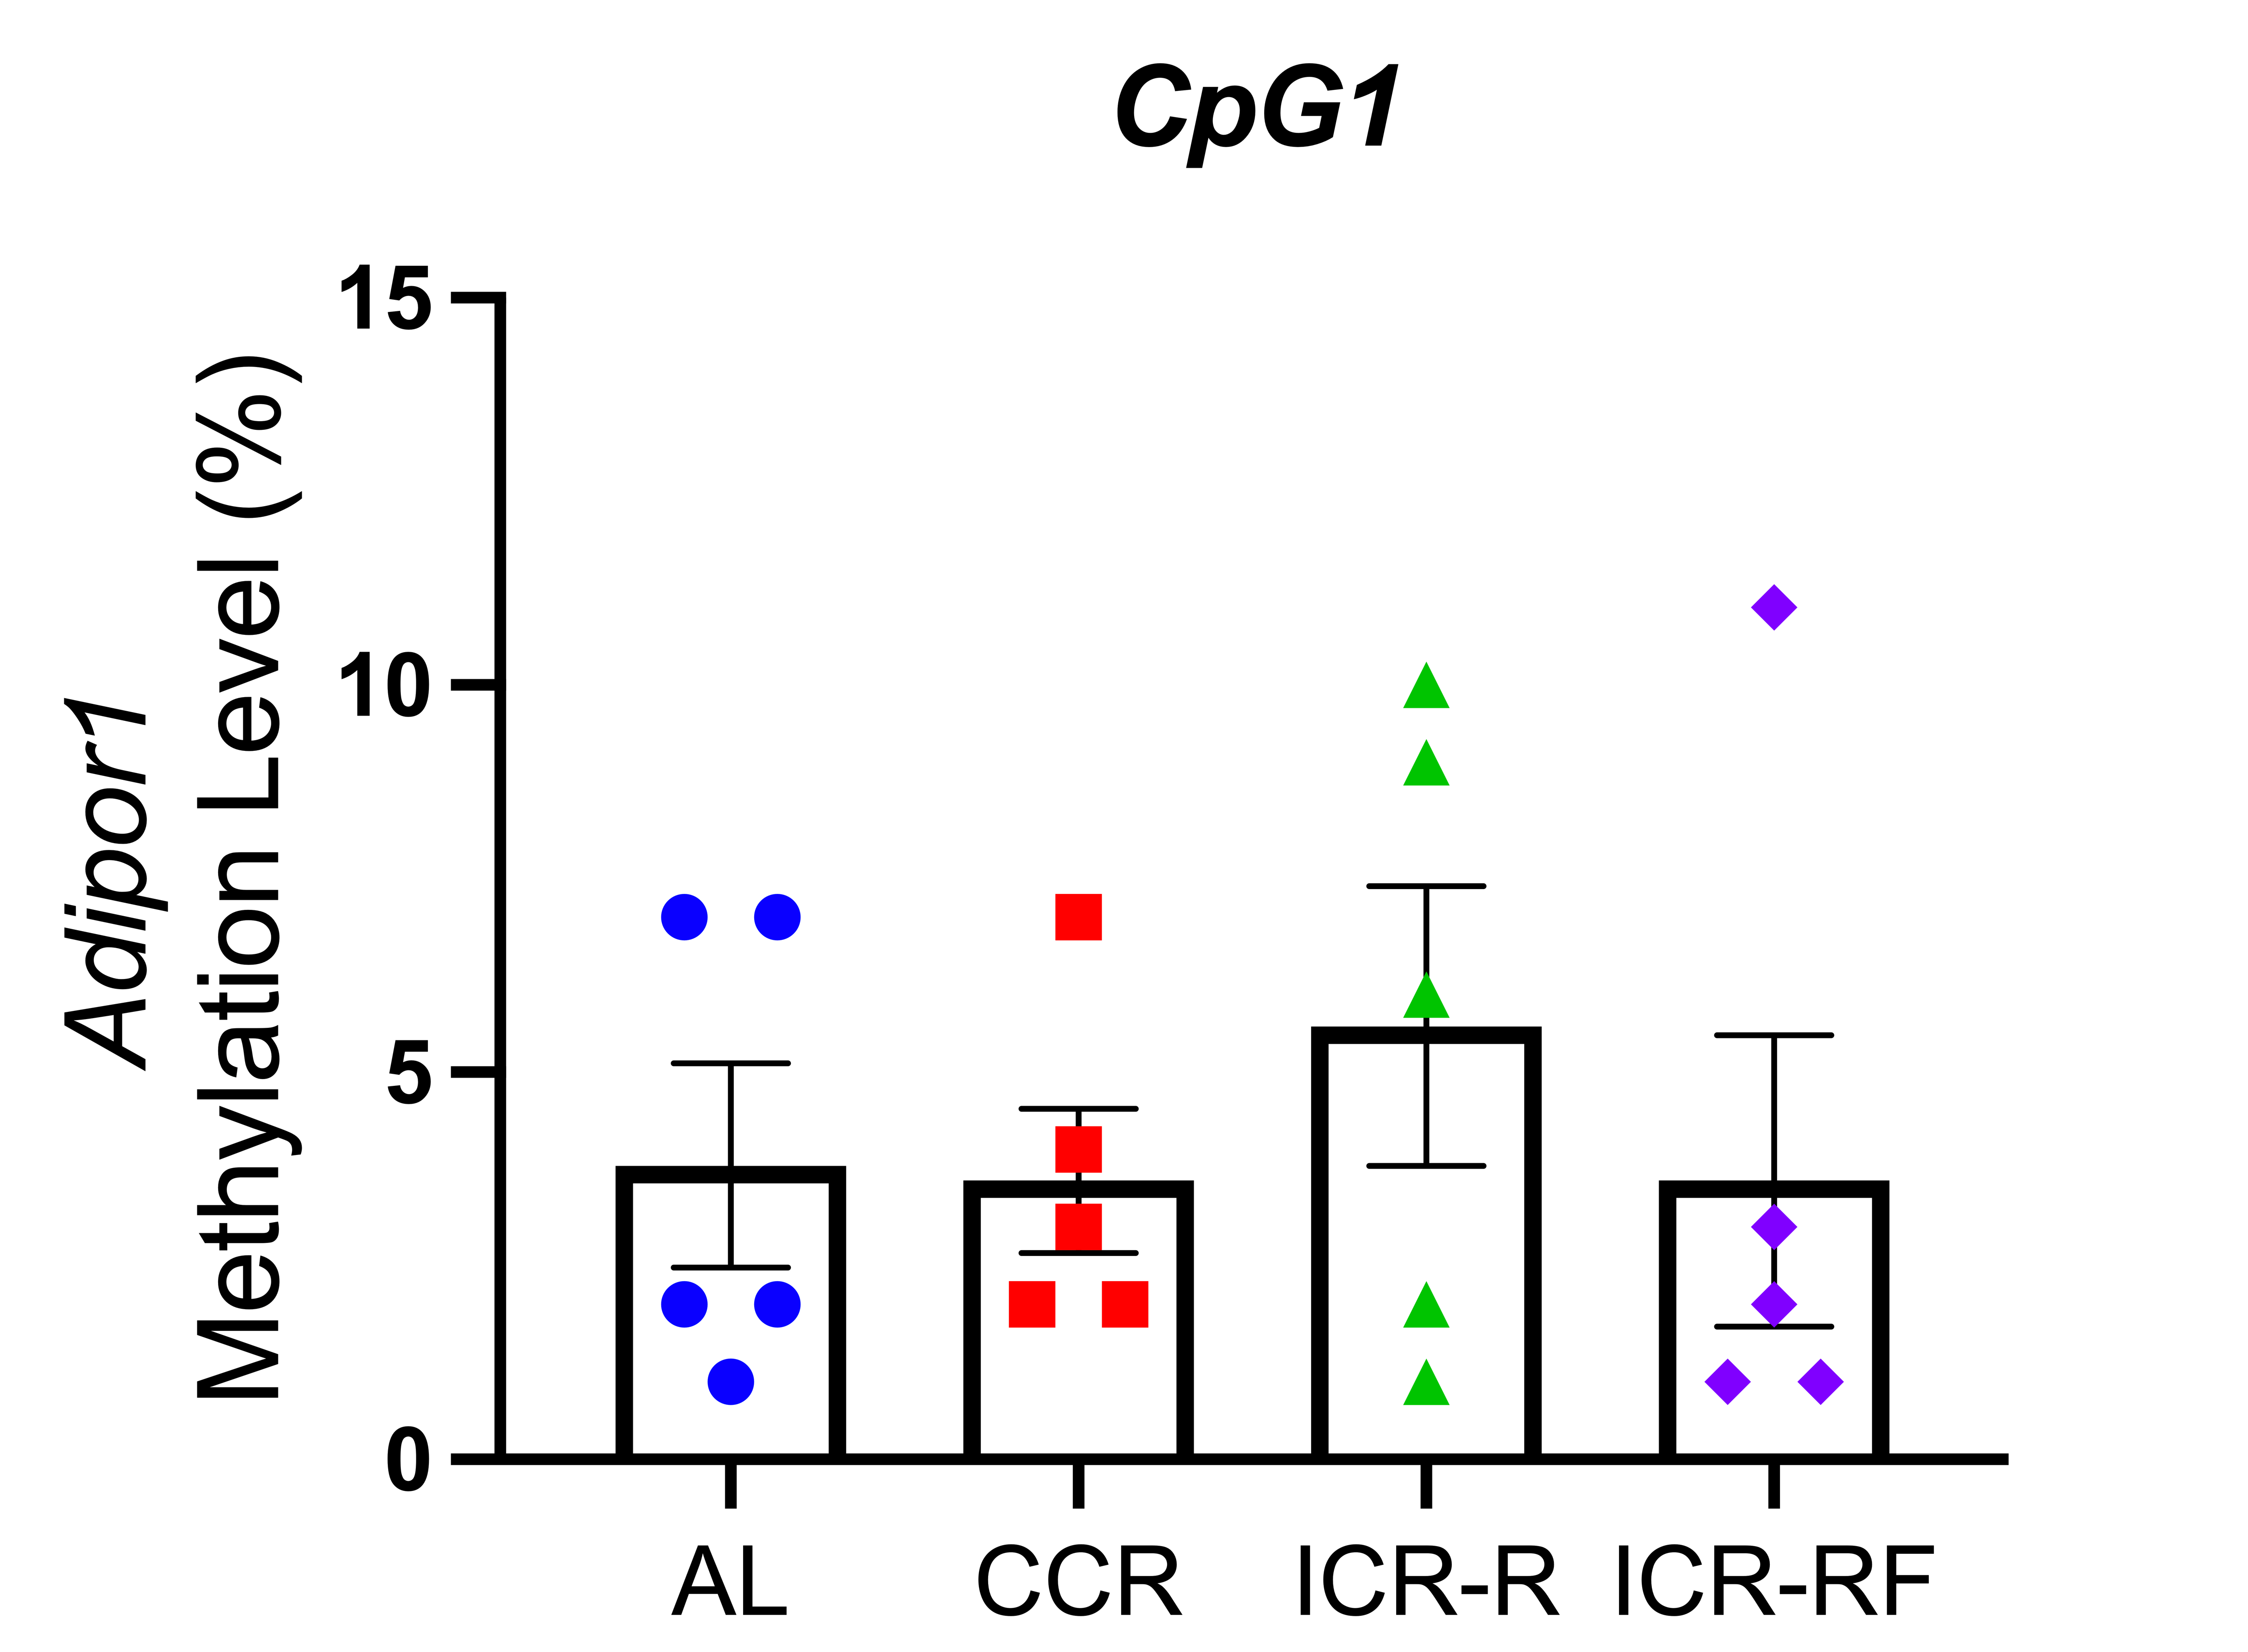

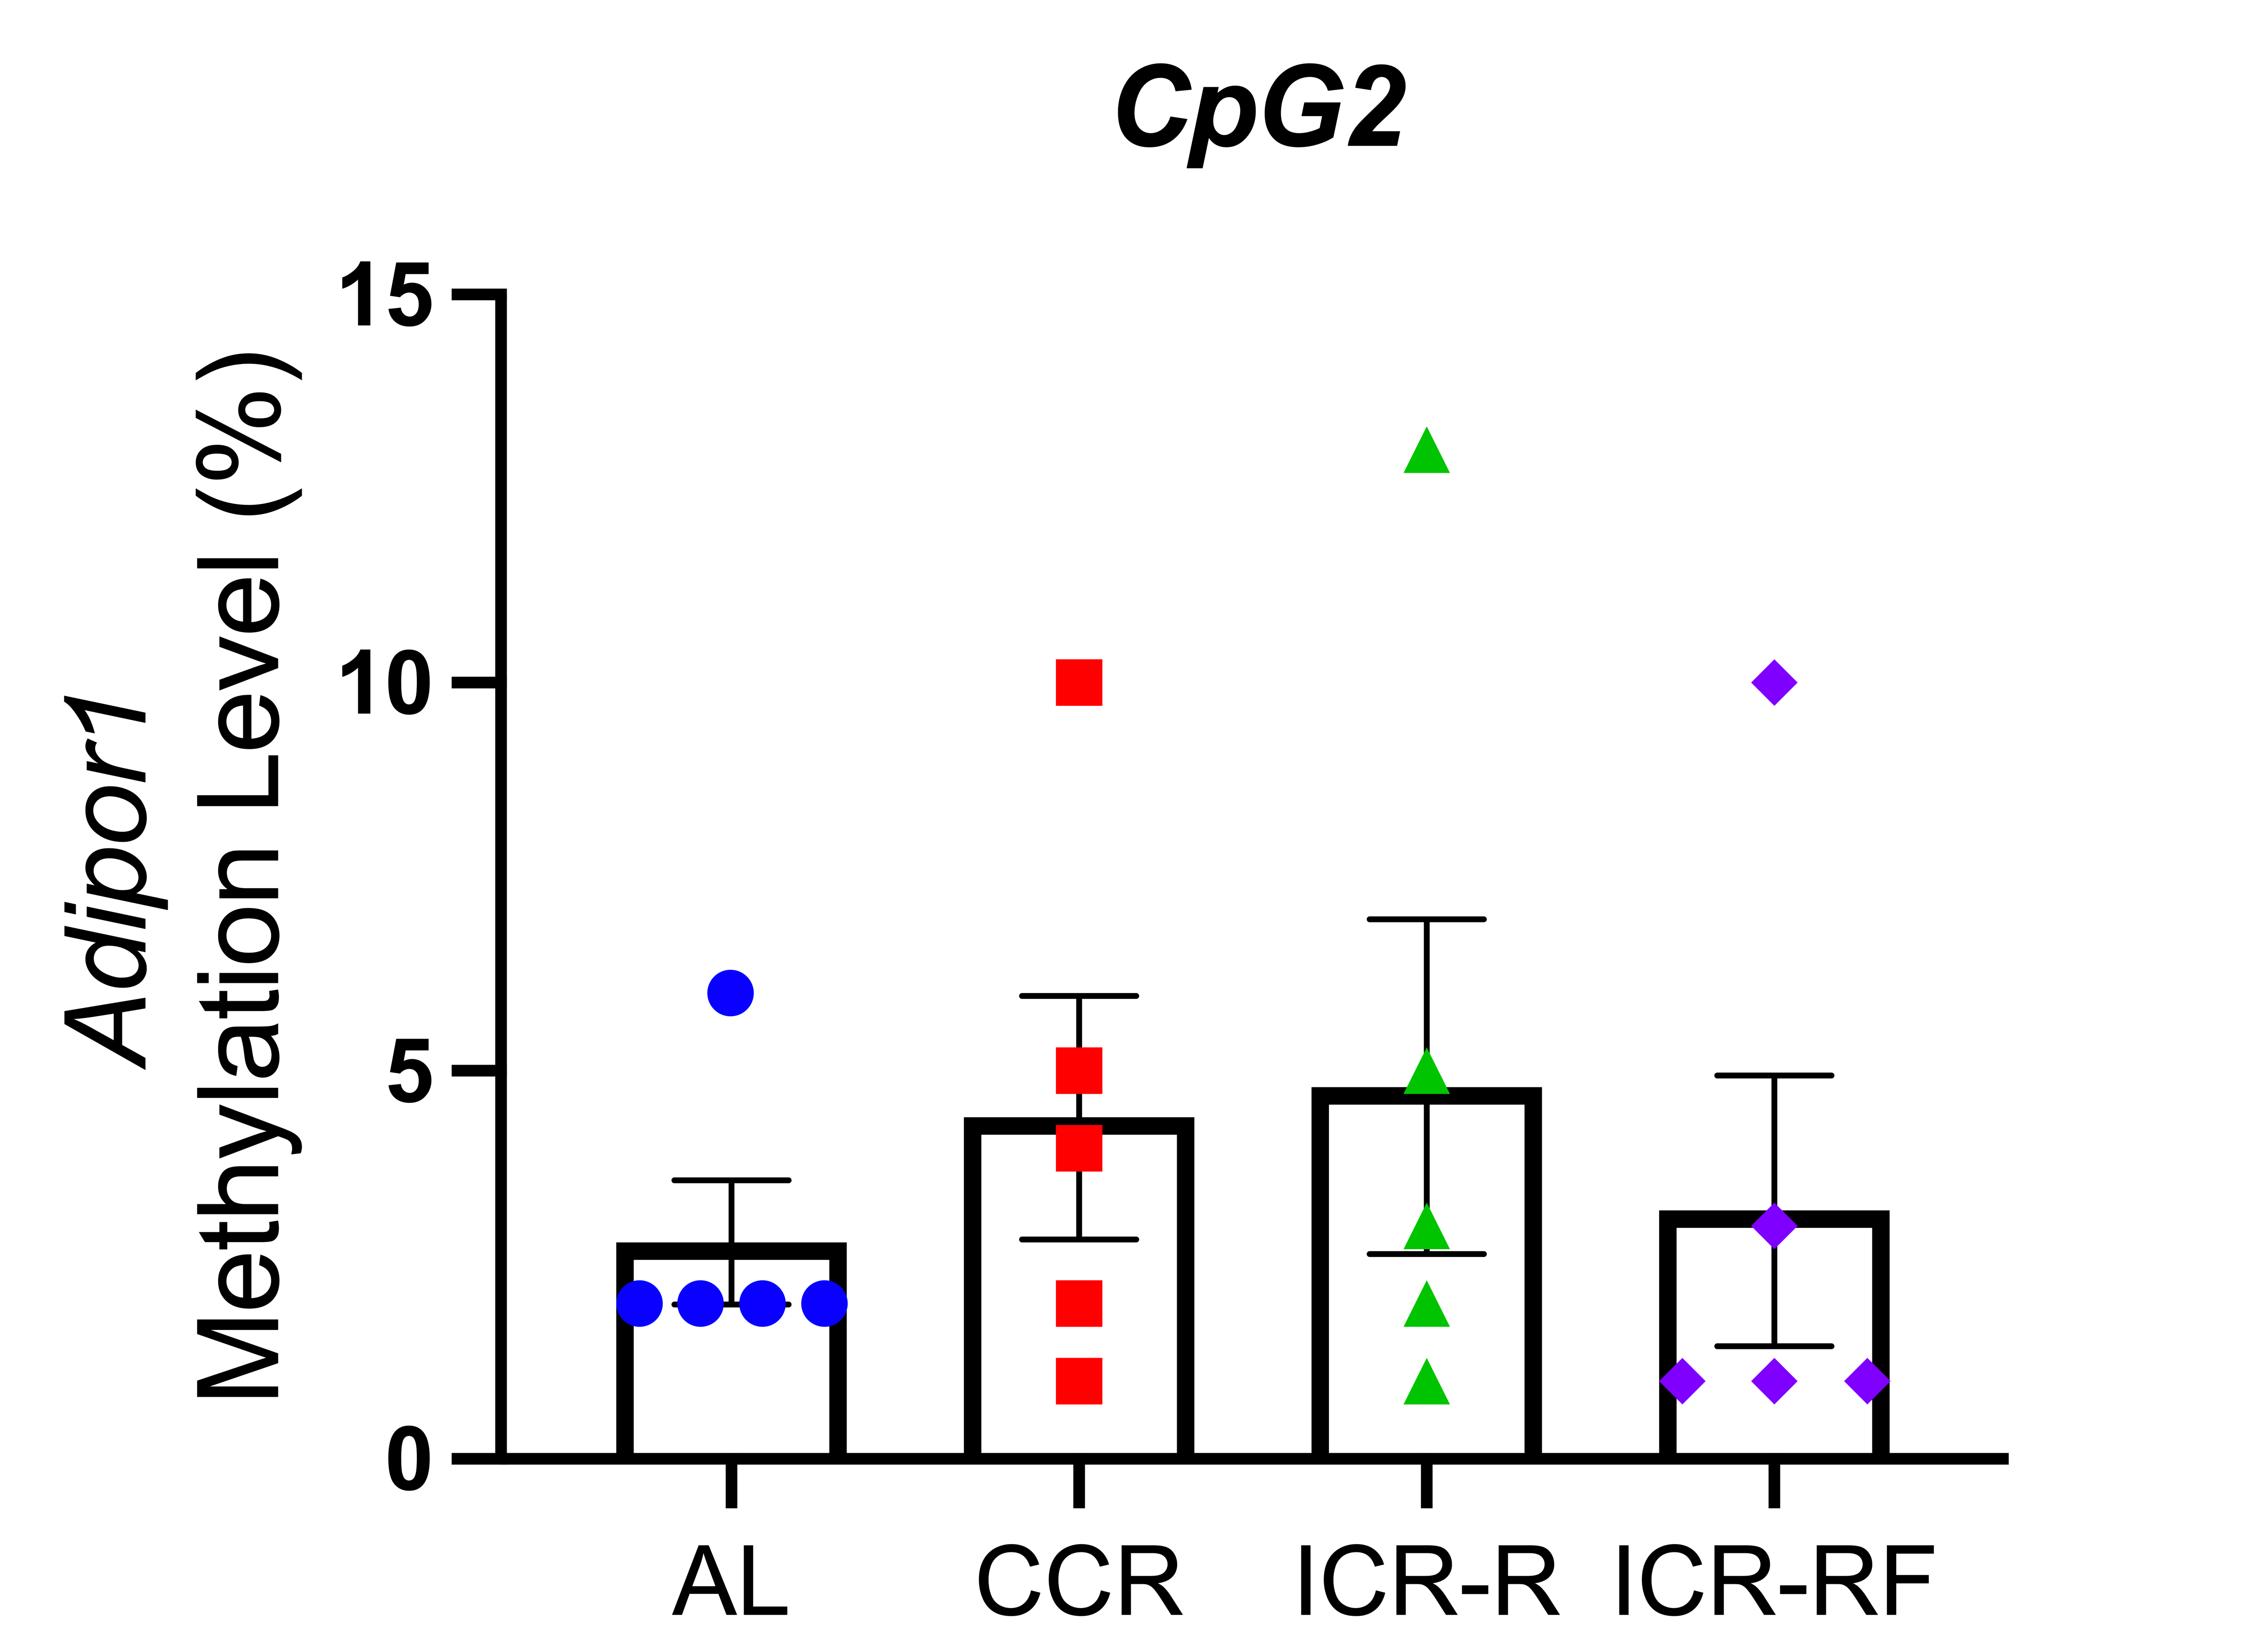

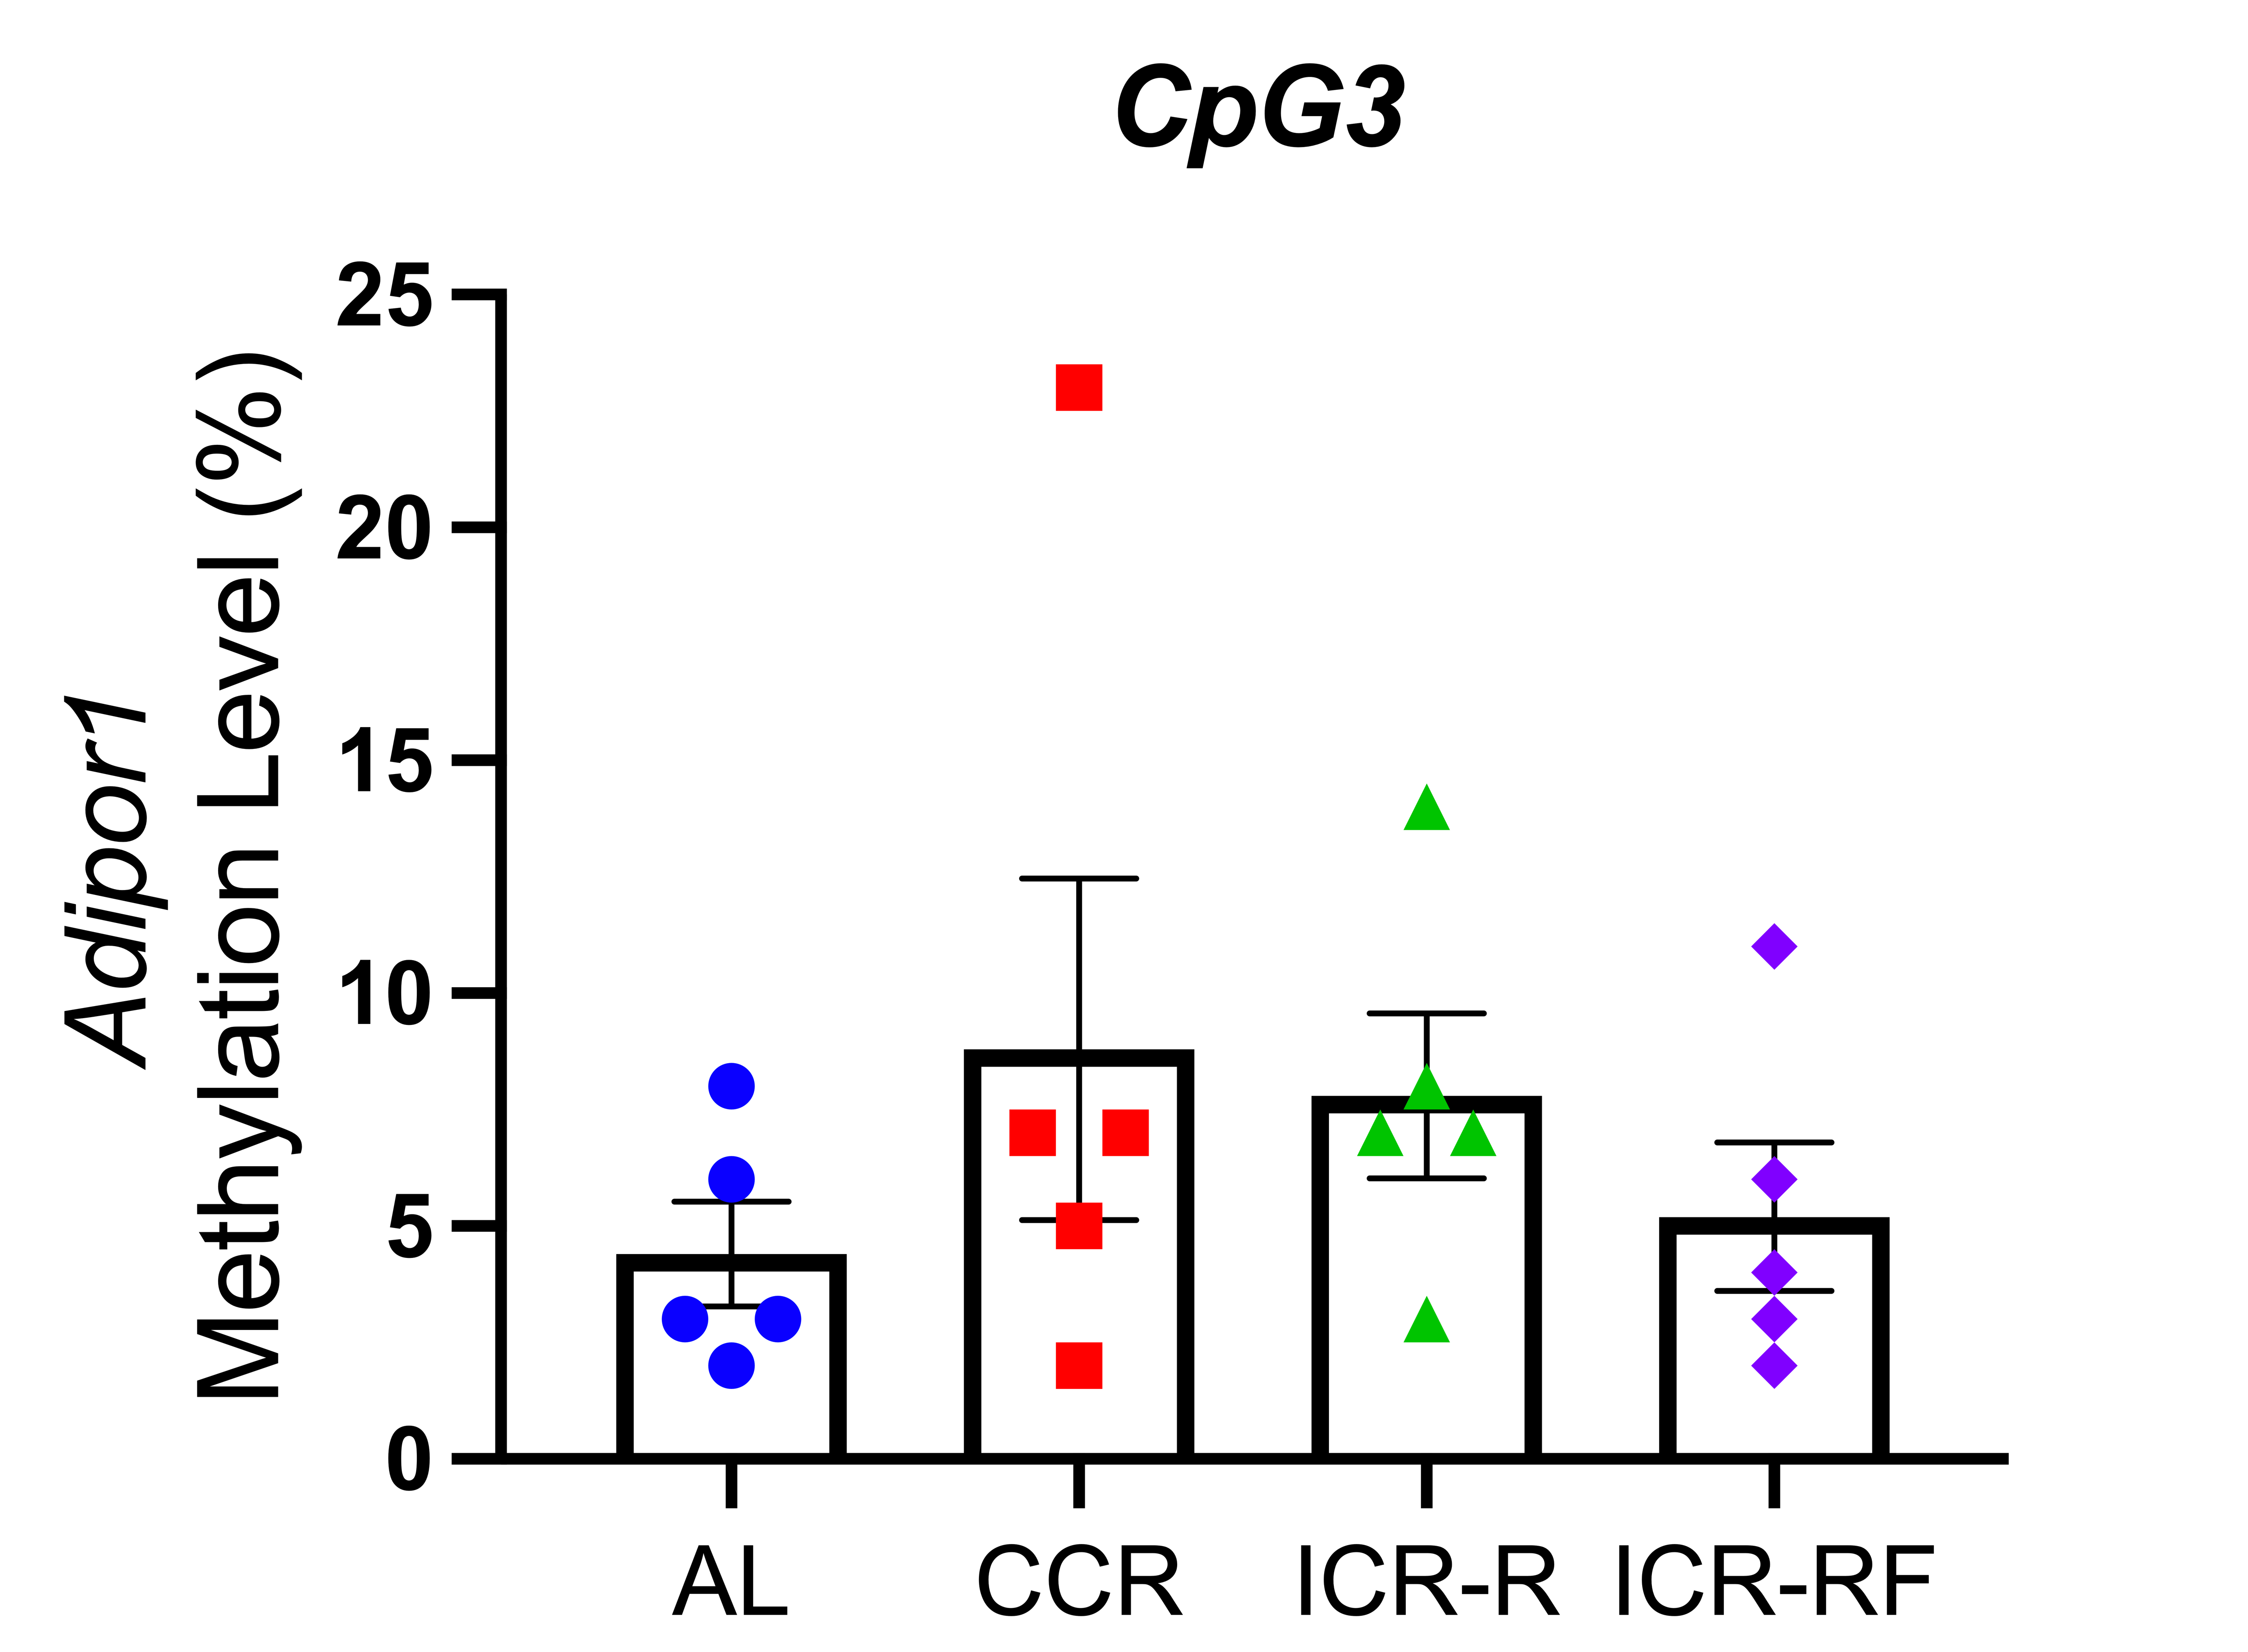


**Week 49/50**

**B.**


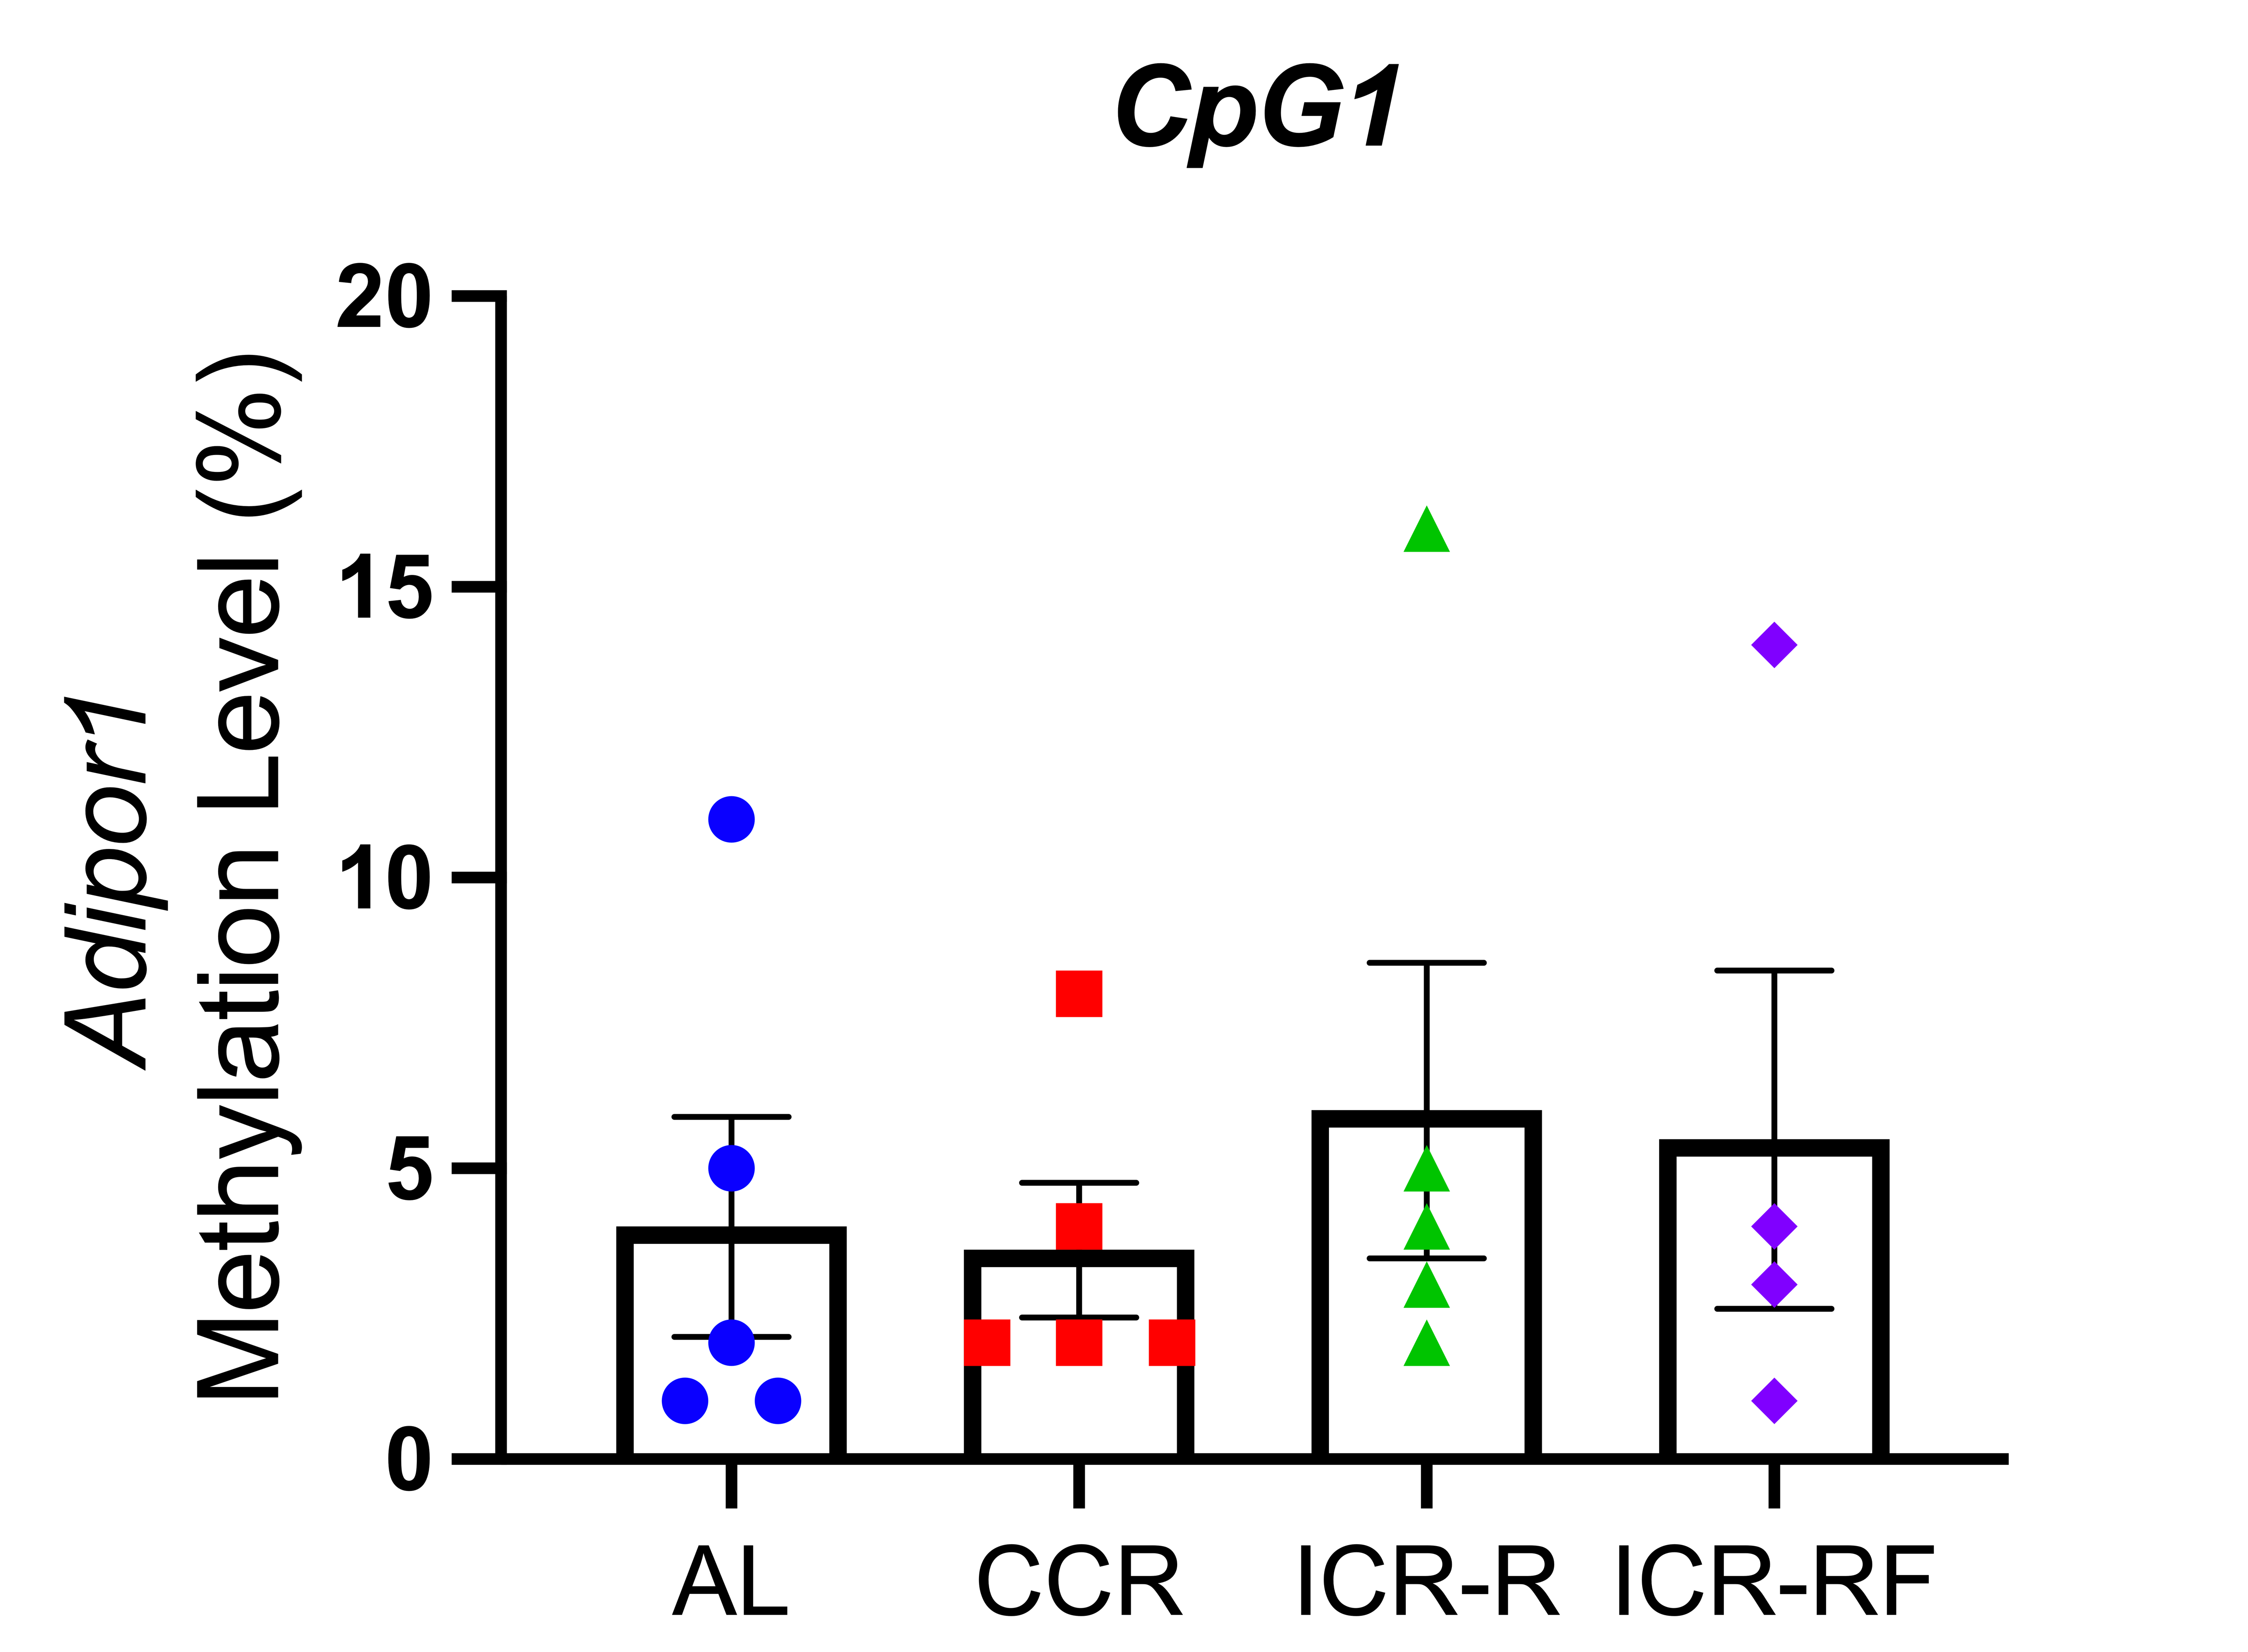

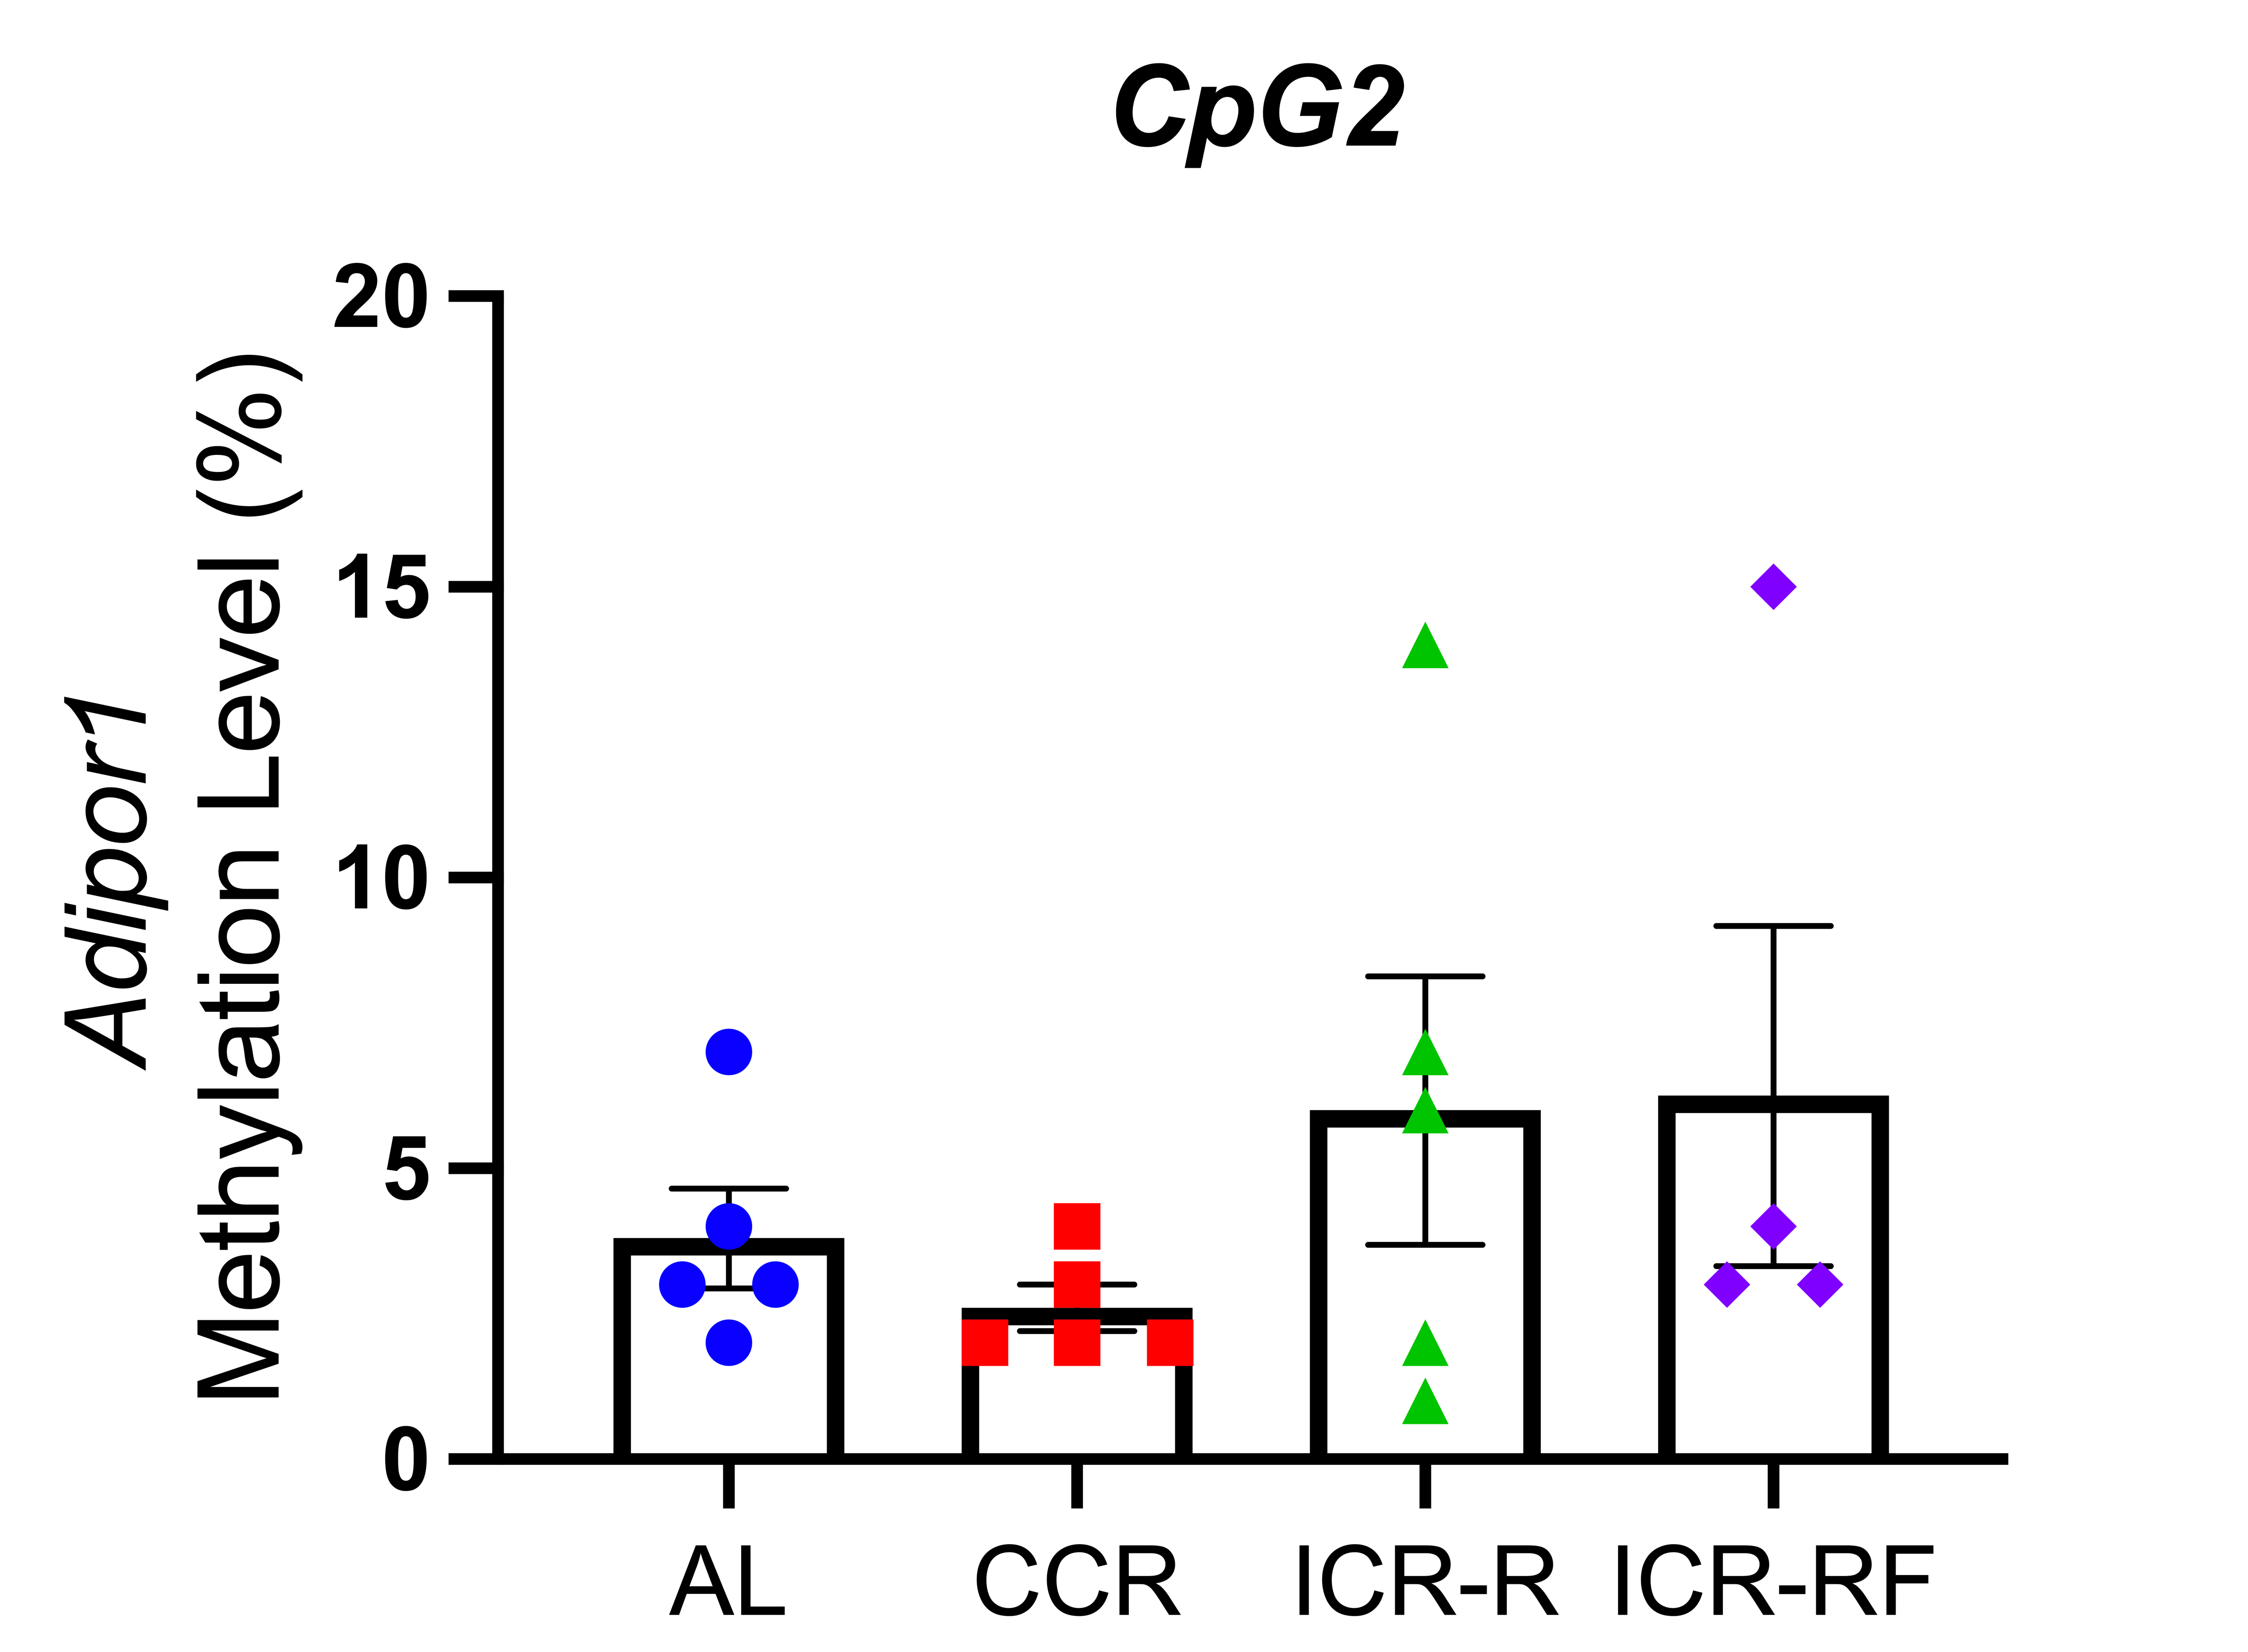

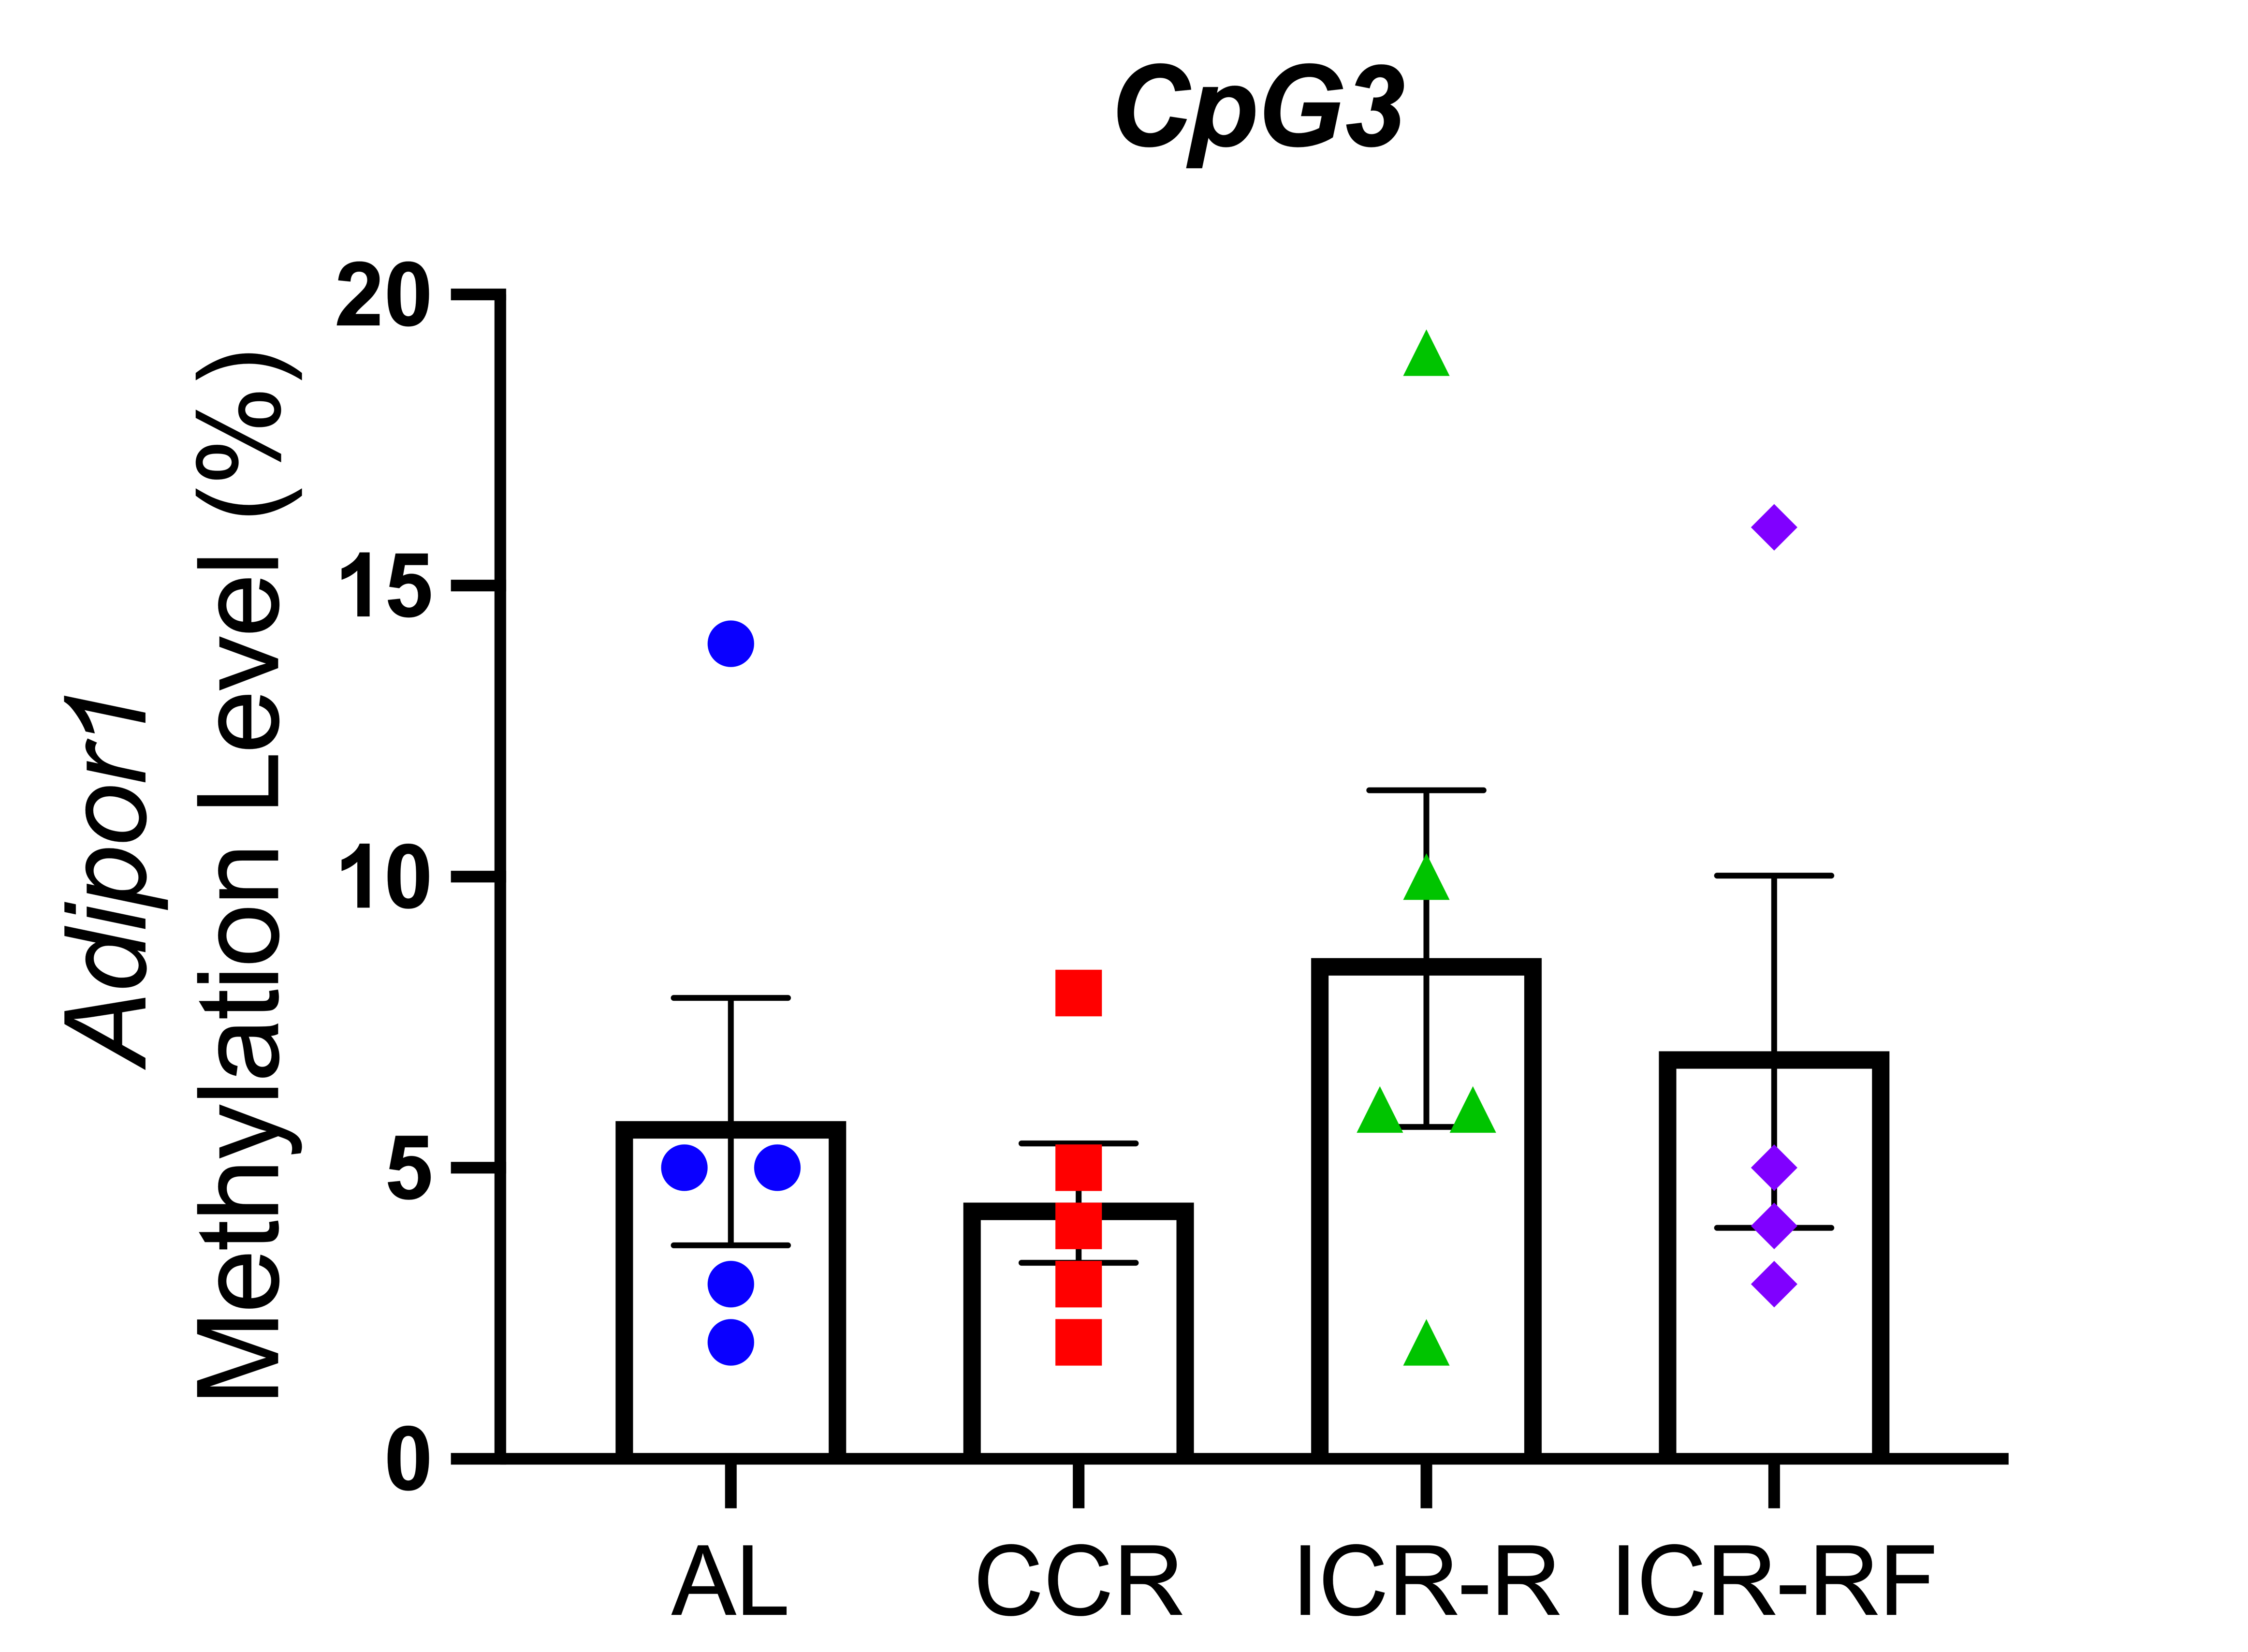


**Week 81/82**

**Supplementary Figure 4.** The effects of different types of calorie restriction on three individual CpG sites on *Adipor1* promoter in mouse brain at (A) week 49/50 (B) week 81/82. Mean ± SEM are presented for each group, n=4-5 biological replicates. Statistical significance determined using one-way ANOVA.

**
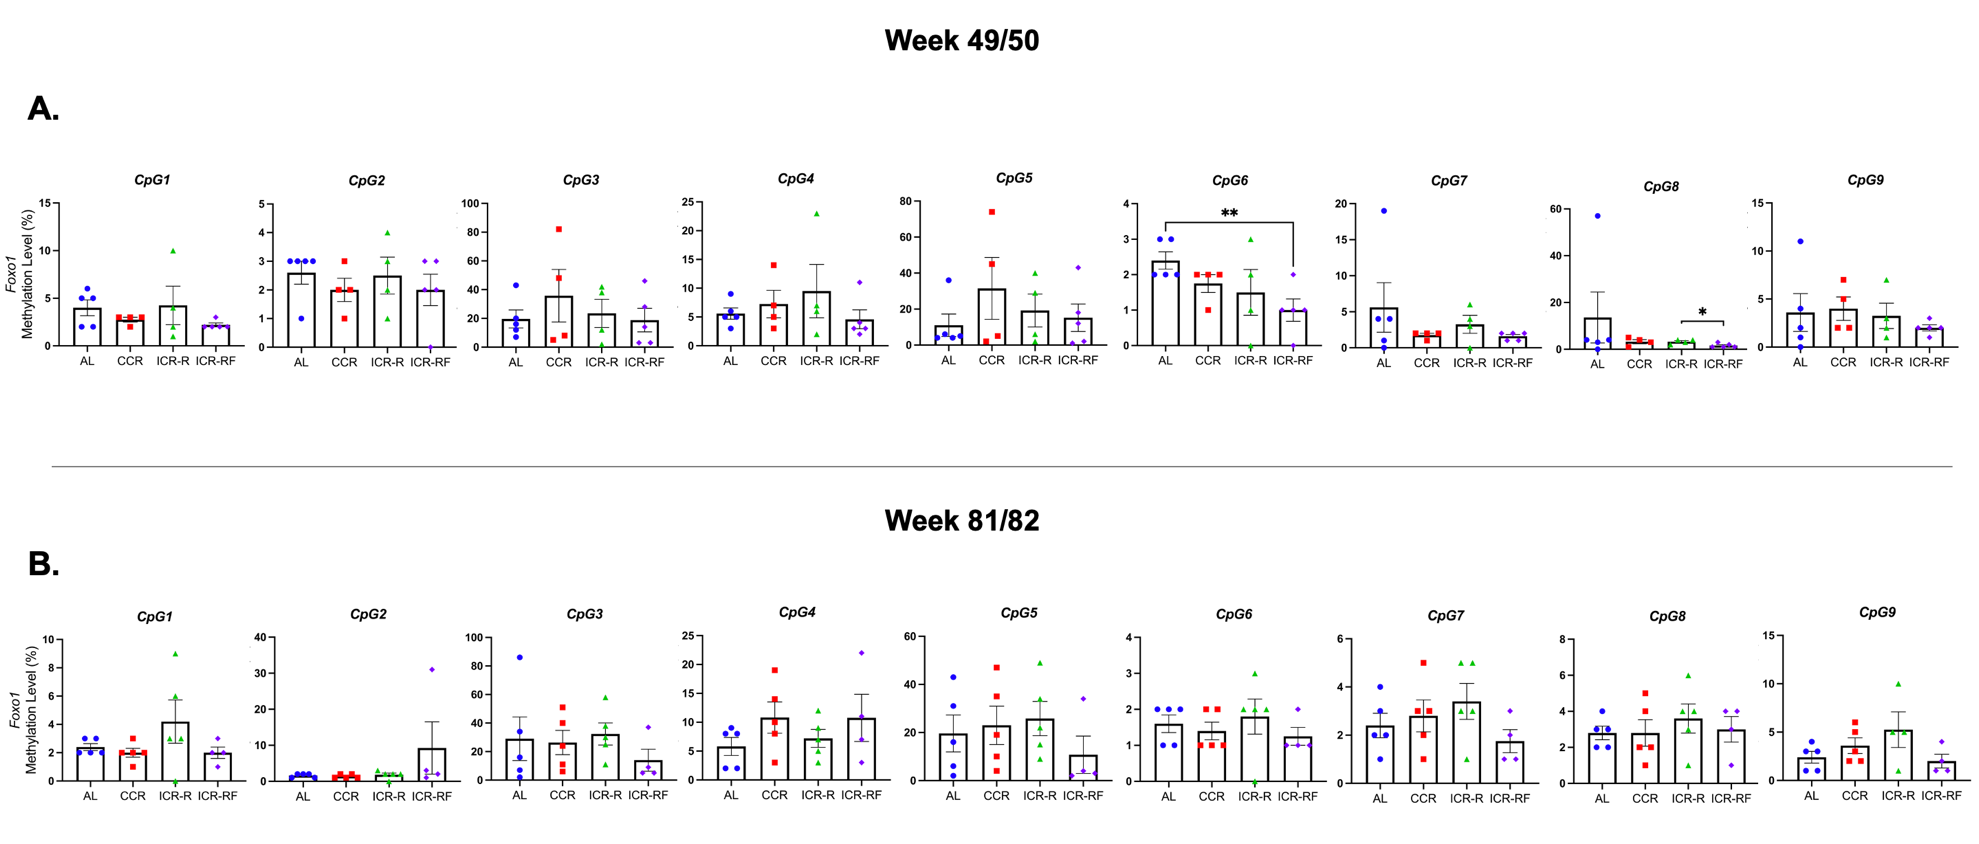
**

**Supplementary Figure 5.** The effects of different types of calorie restriction on nine individual CpG sites of *Foxo1* promoter in mouse brain at (A) week 49/50 (B) week 81/82. Mean ± SEM are presented for each group, n=4-5 biological replicates. Statistical significance determined using one-way ANOVA. *p<0.05, **p<0.01.


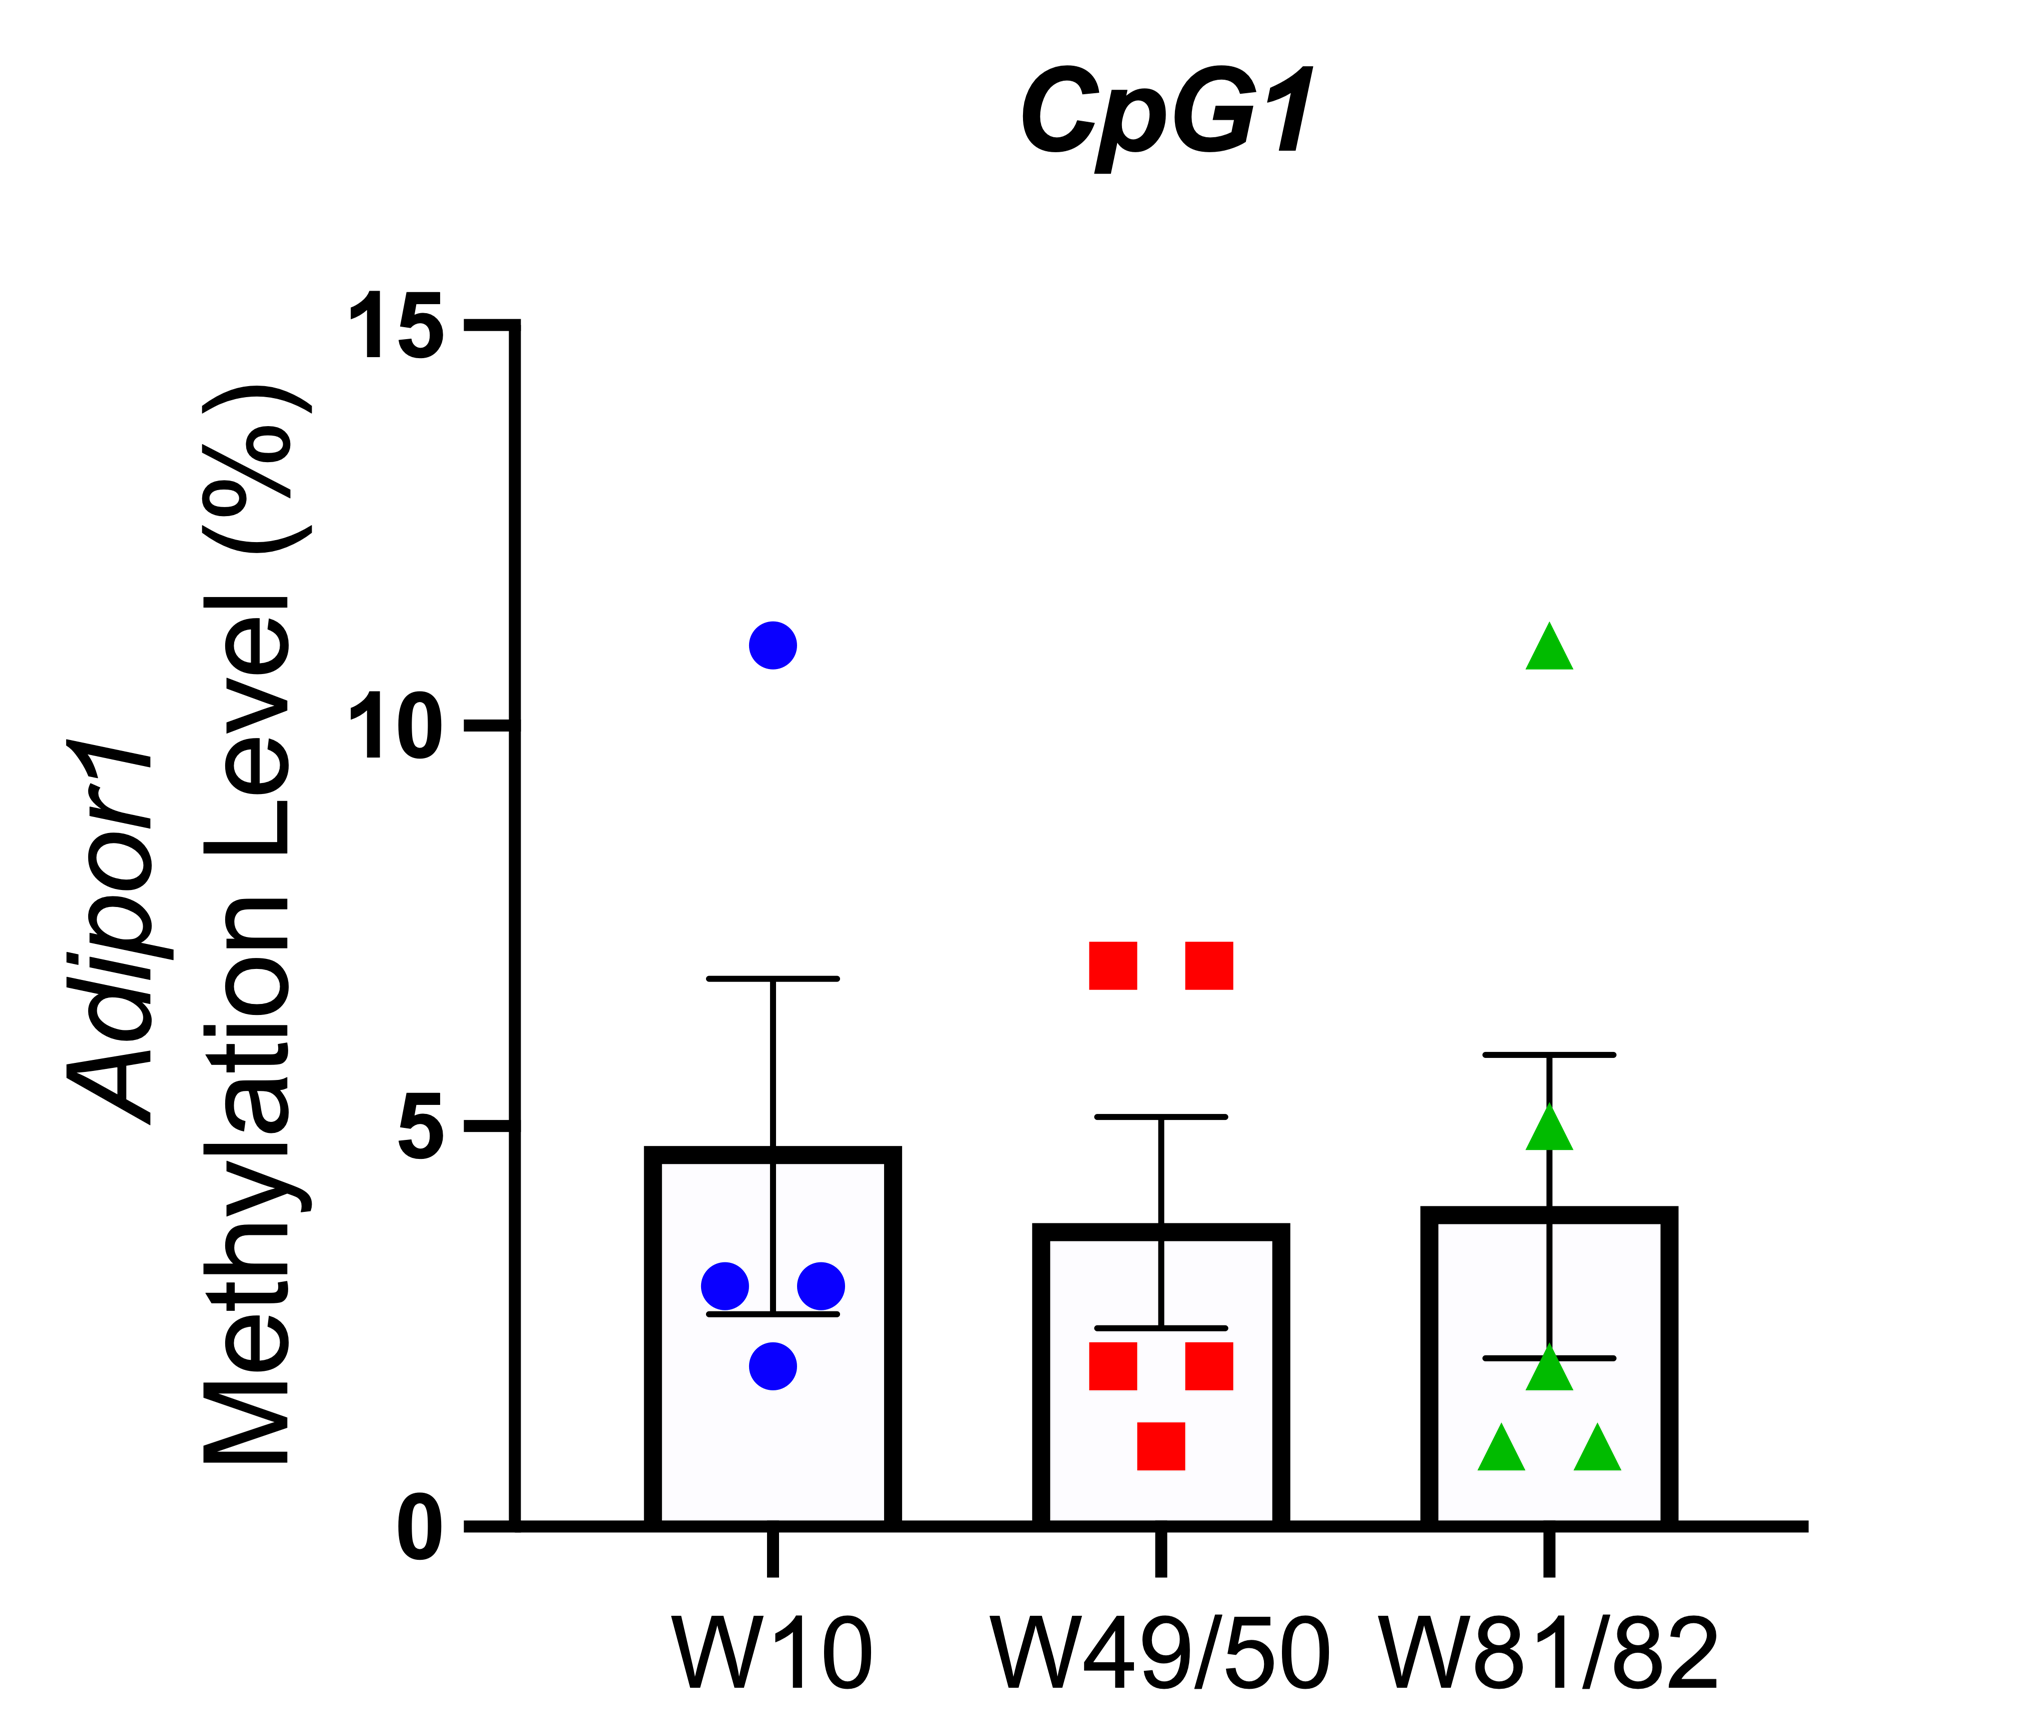

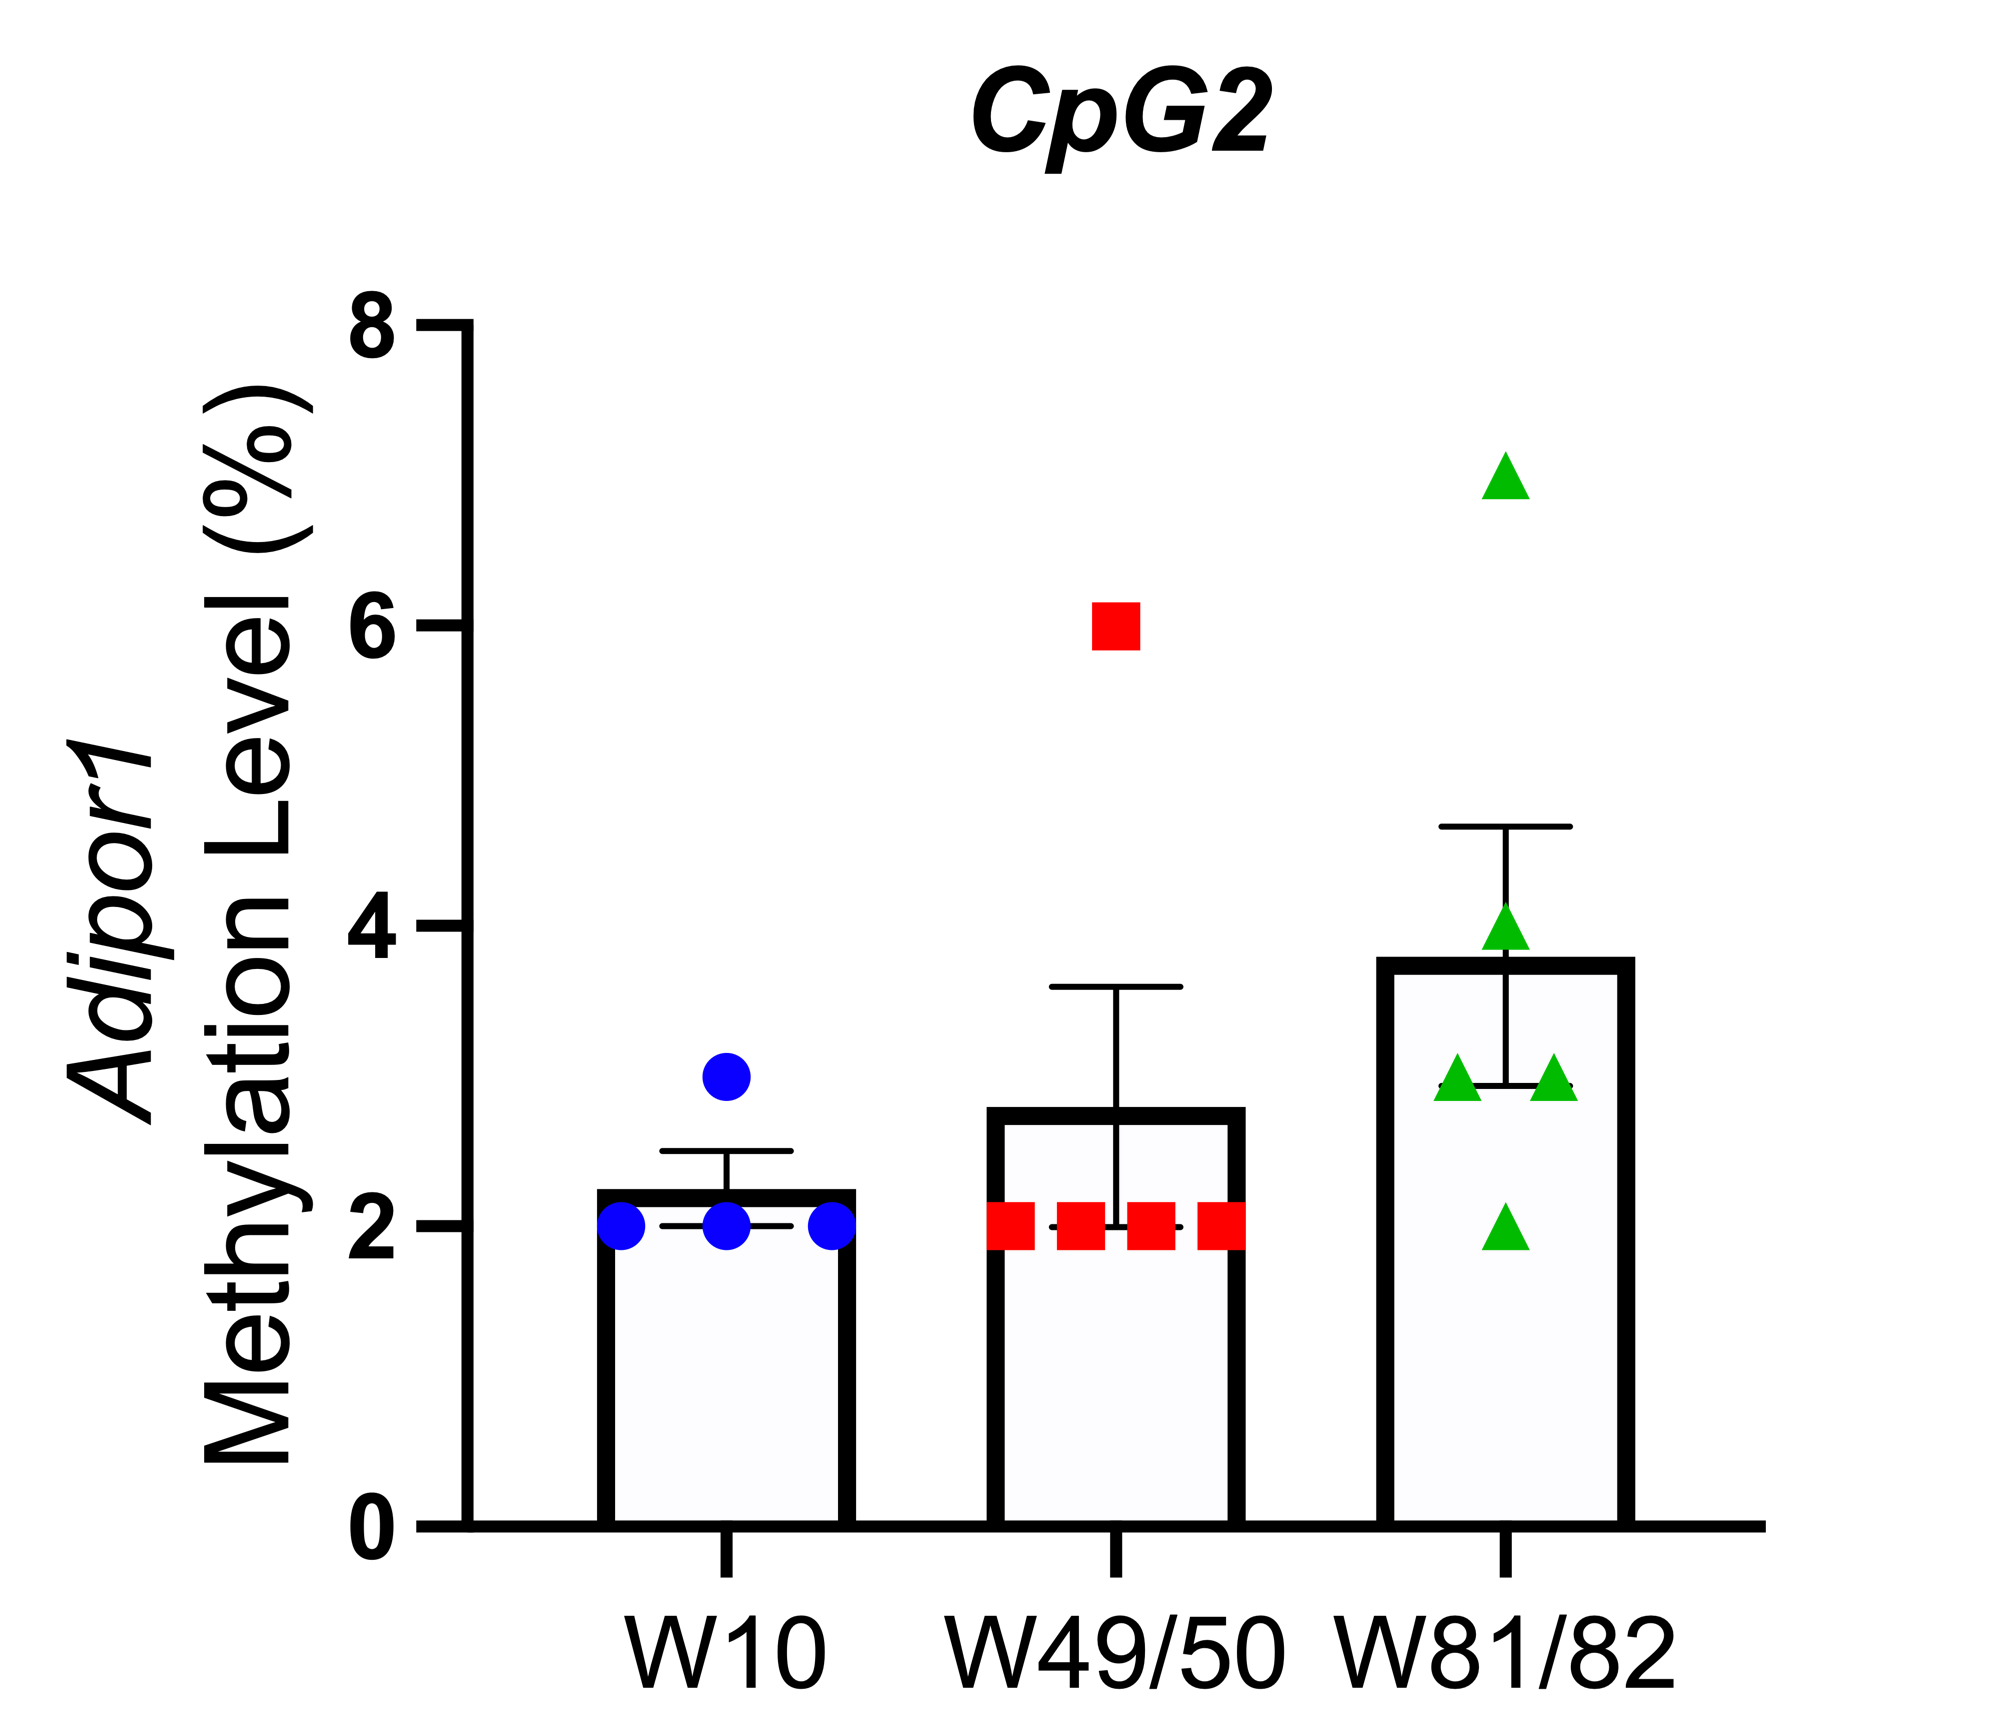

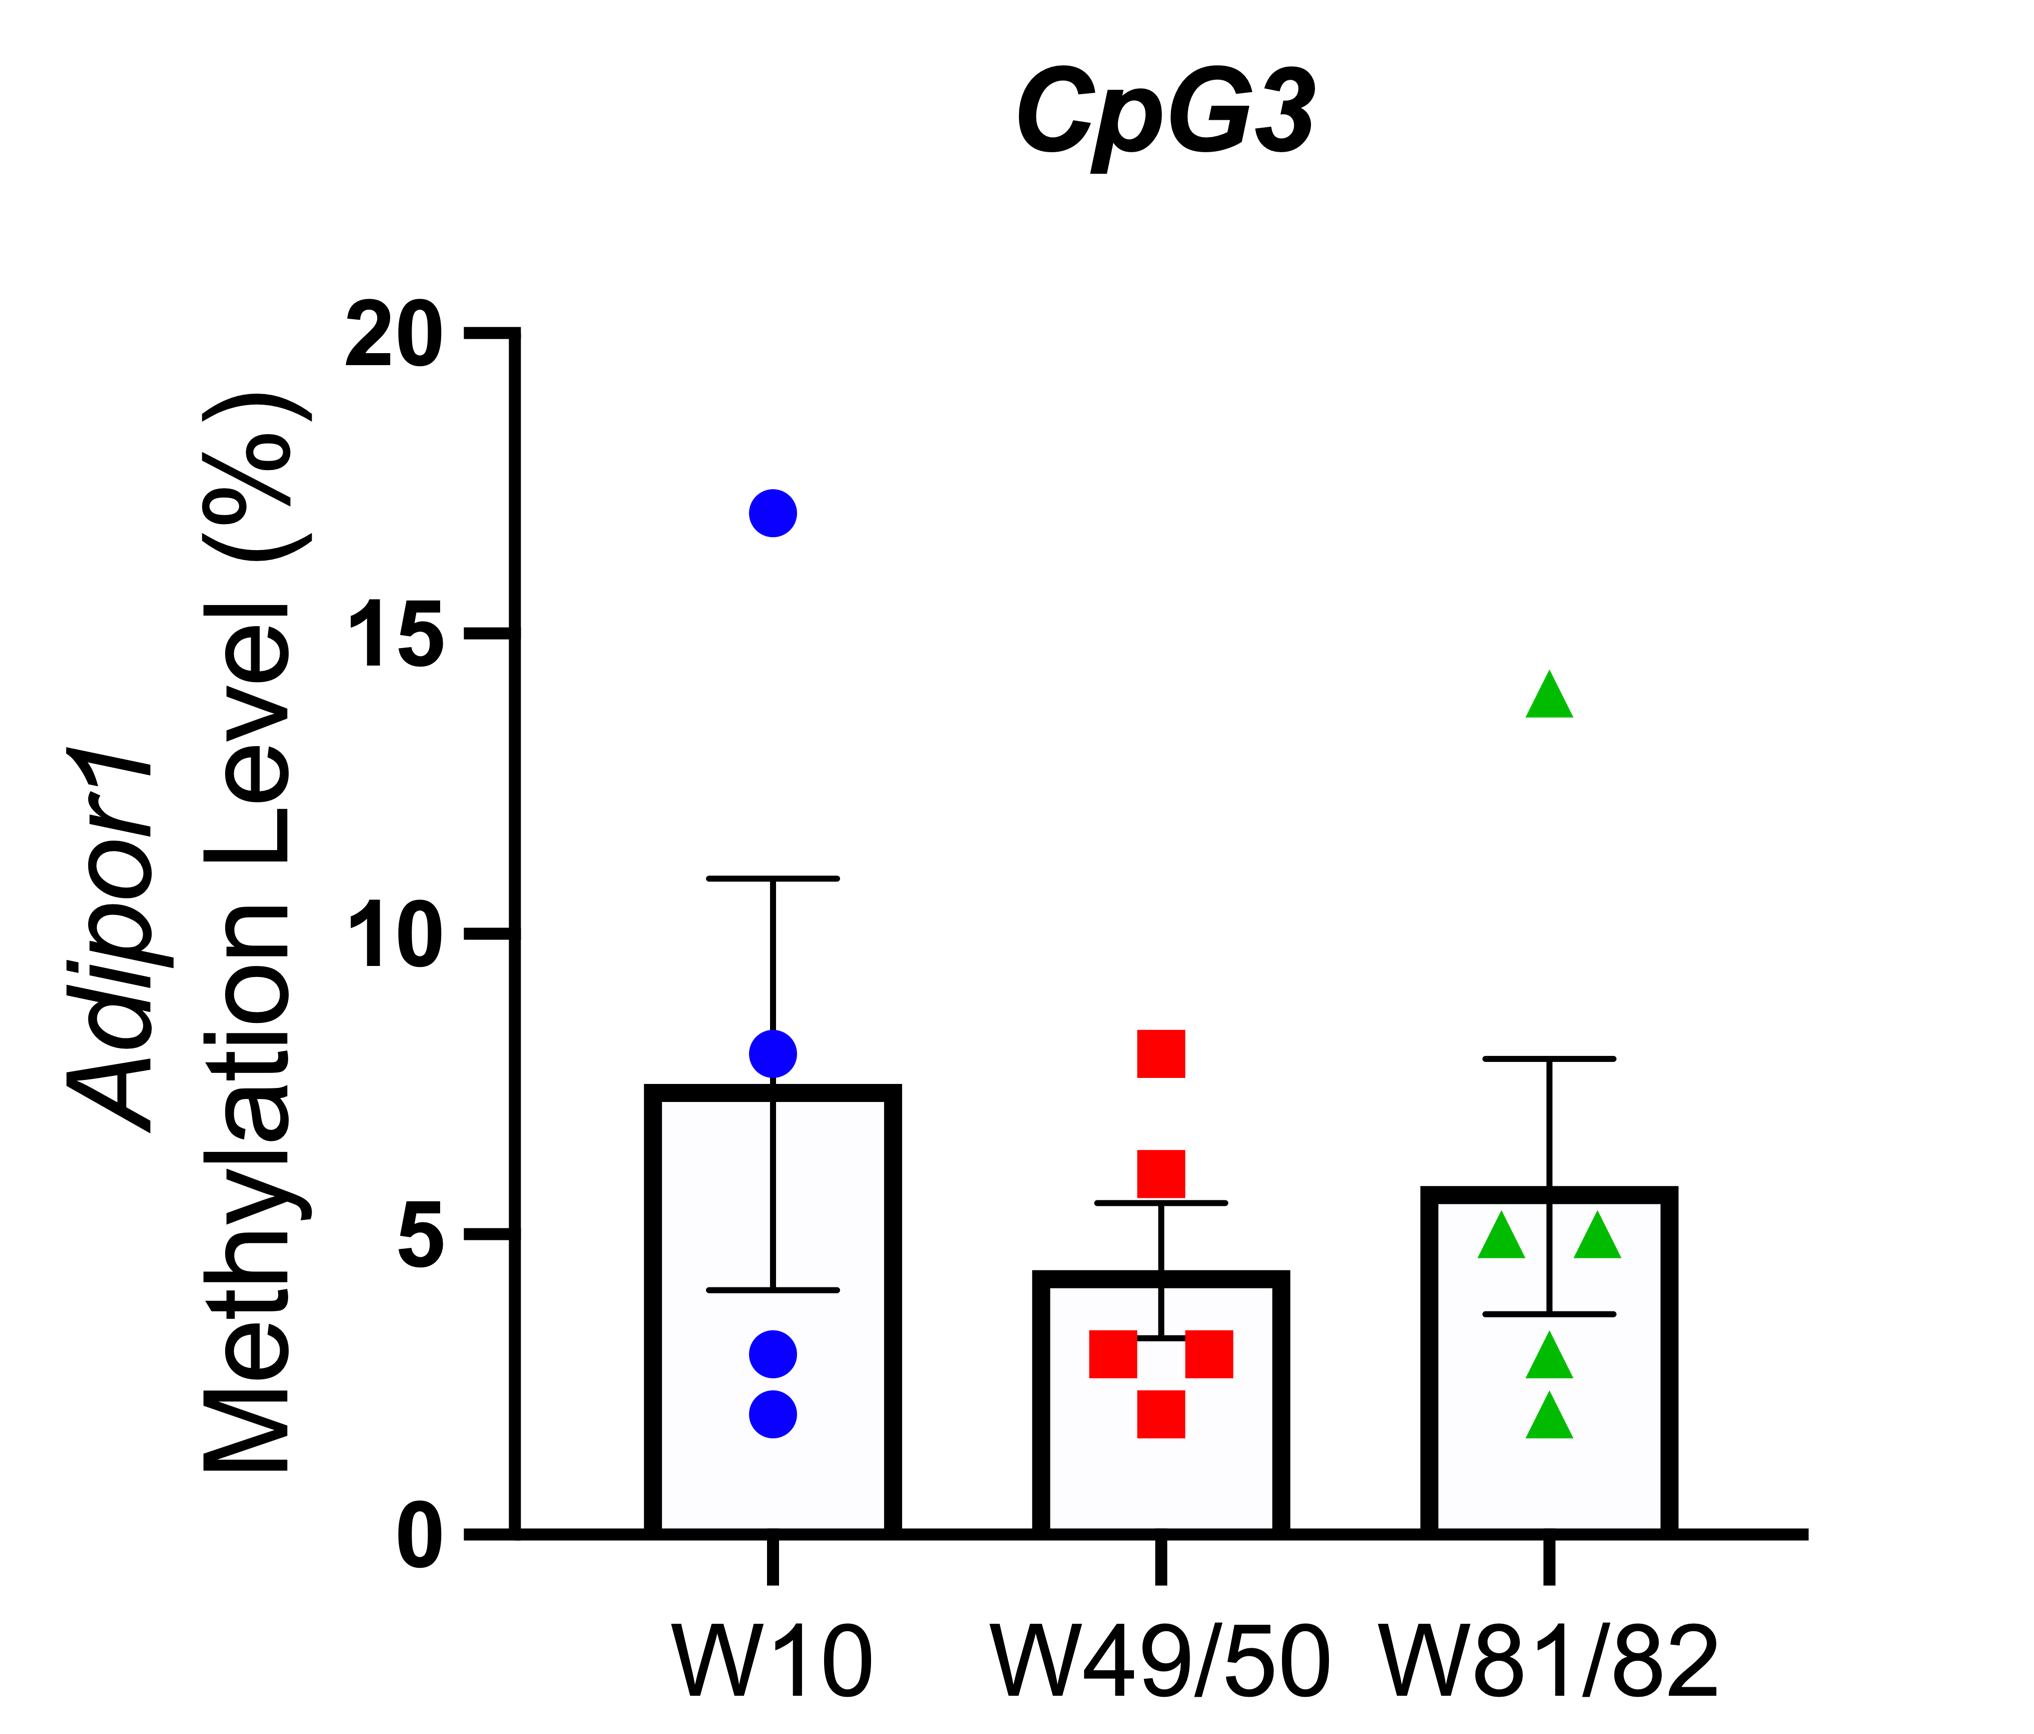


**A.**


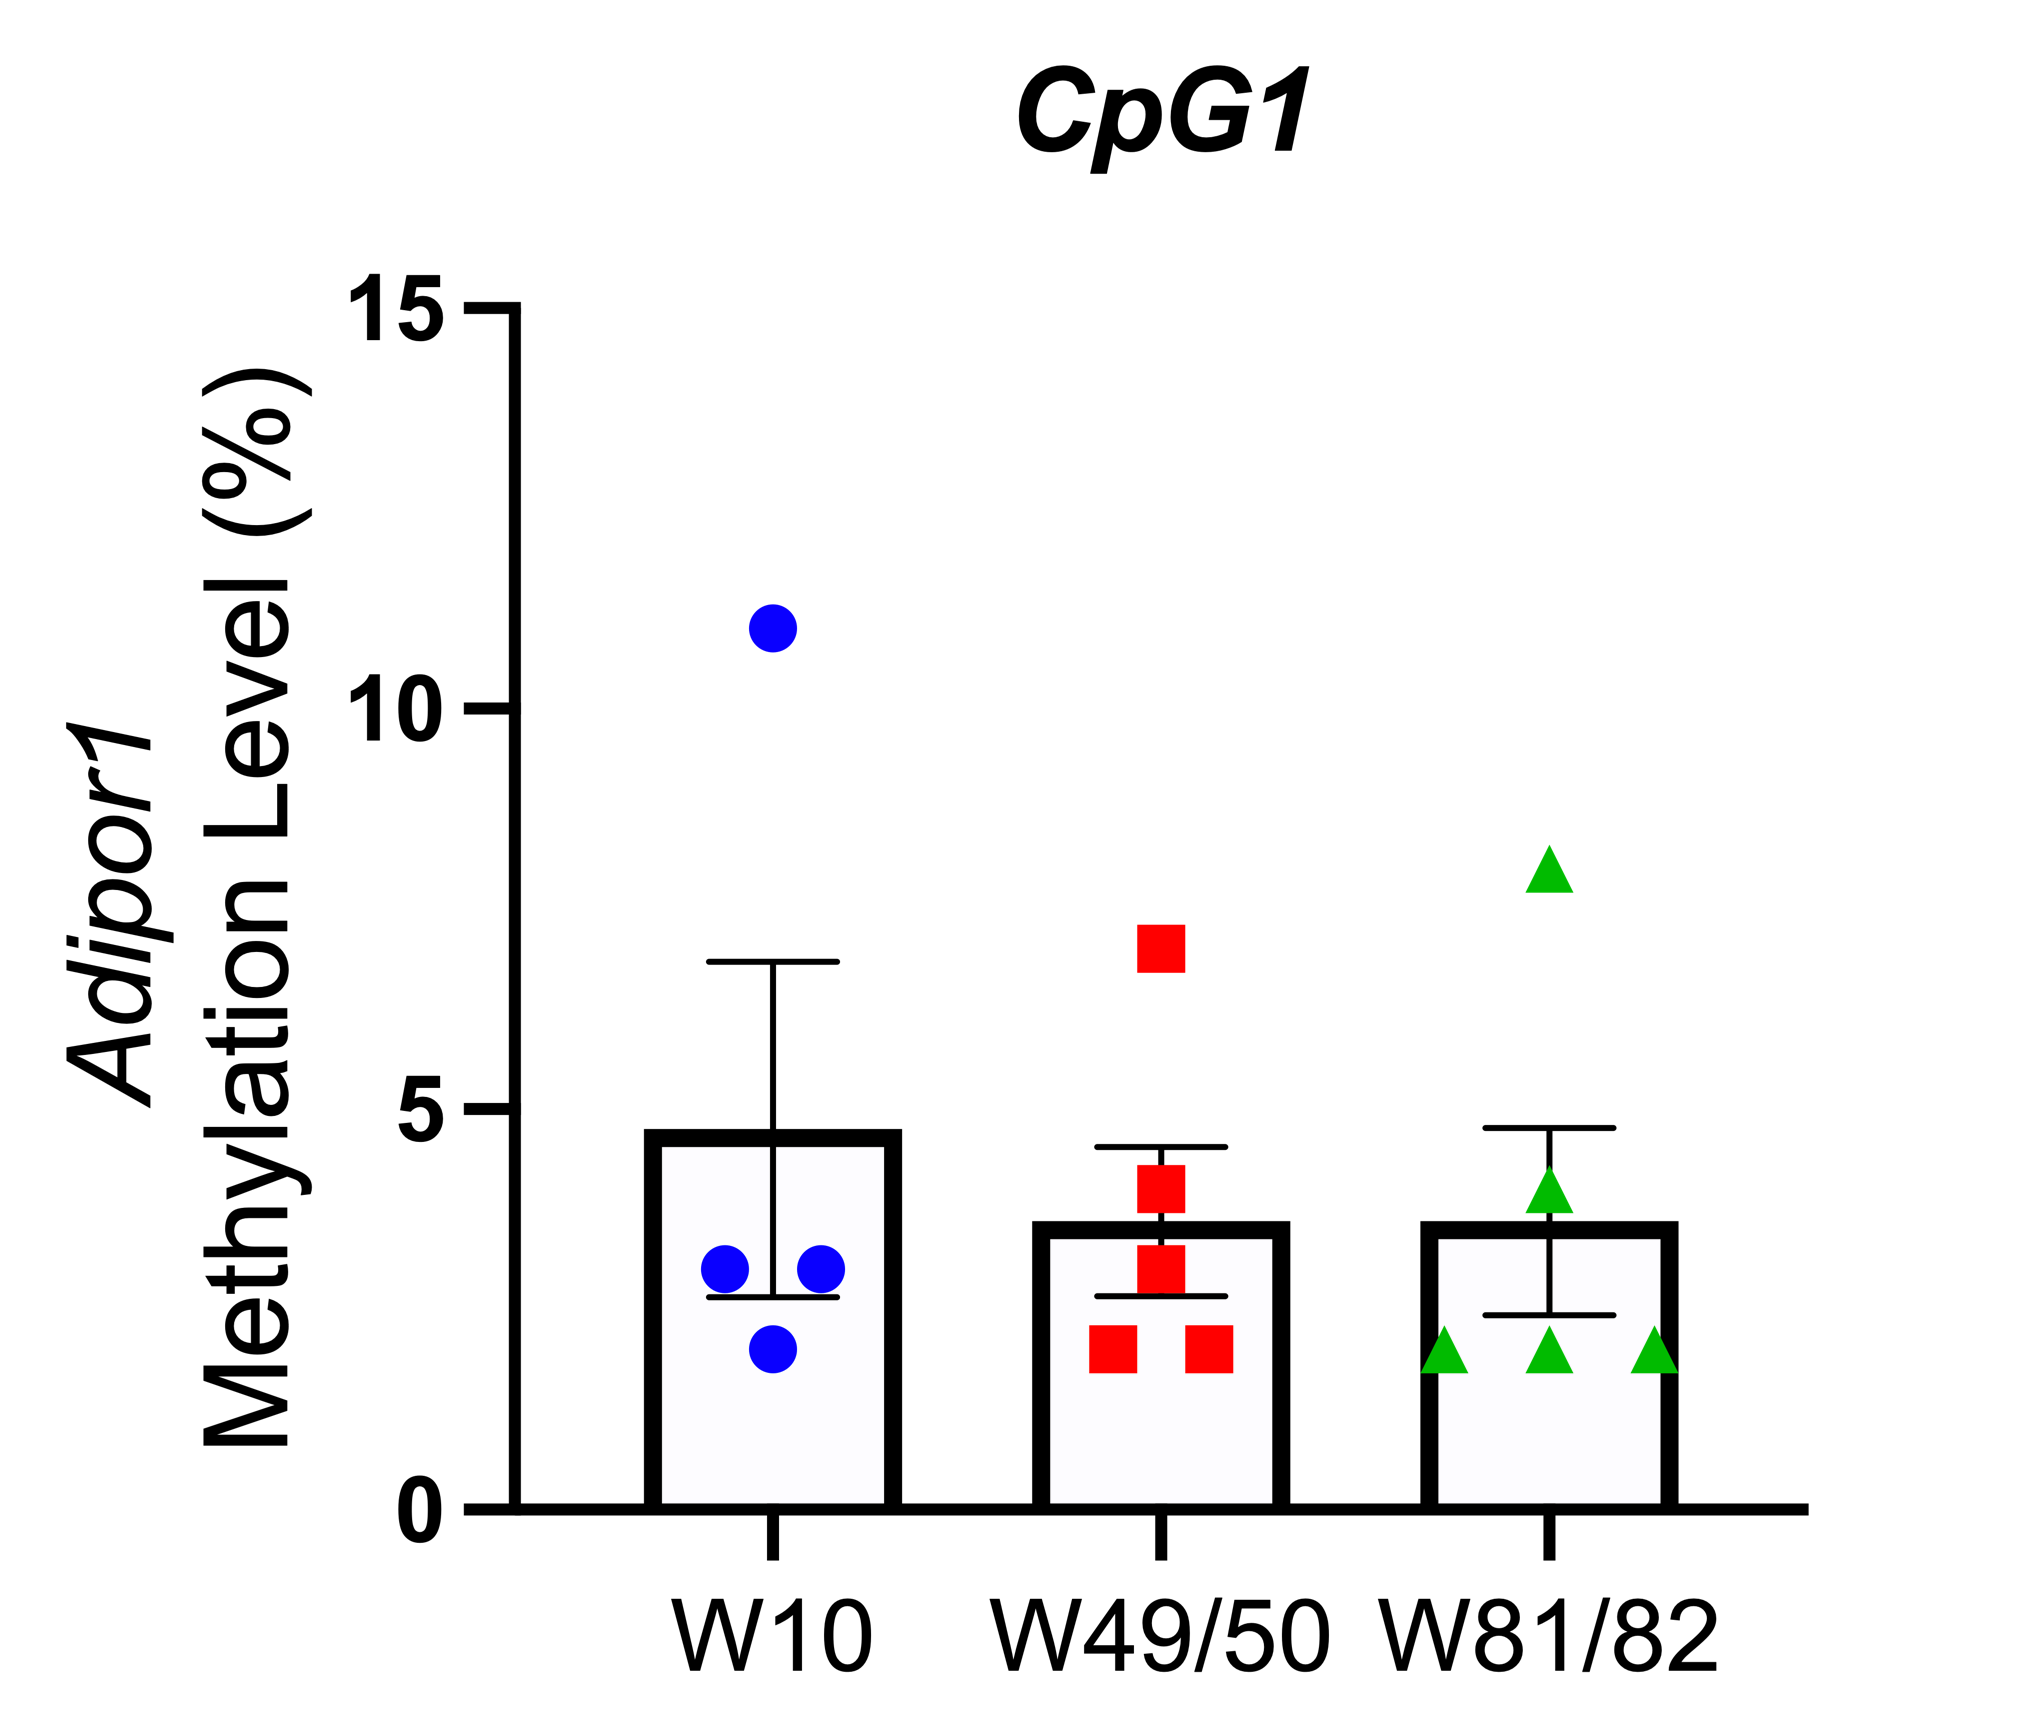

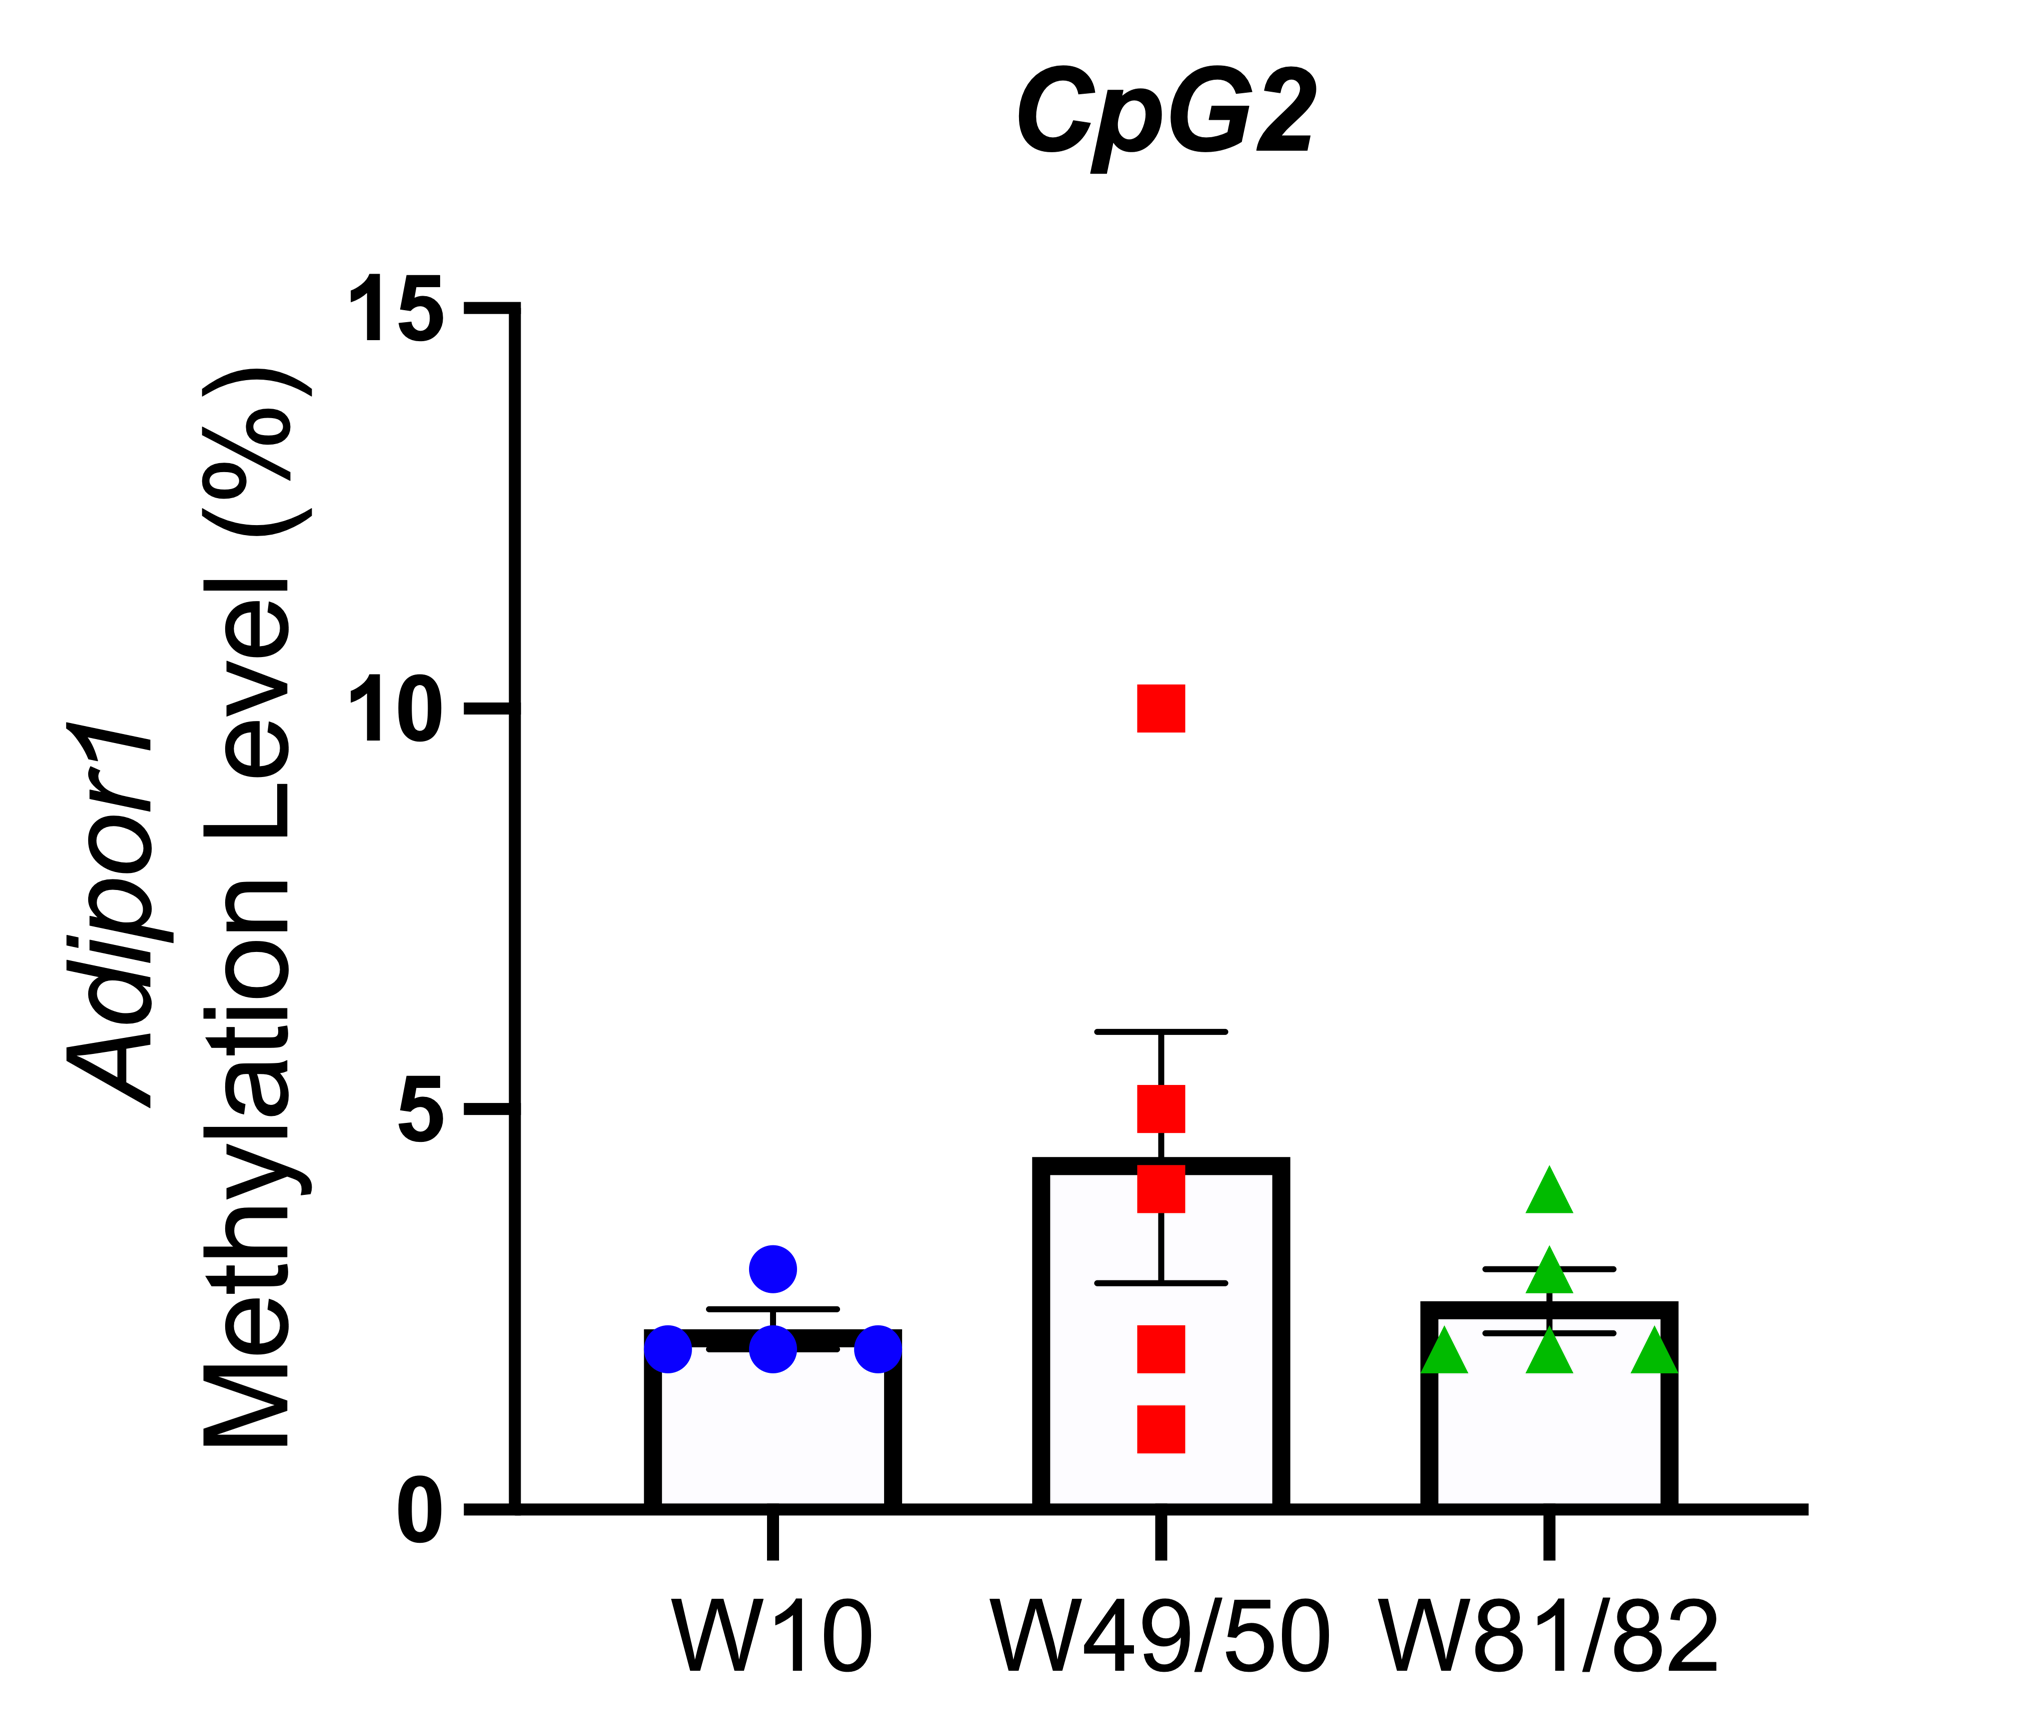

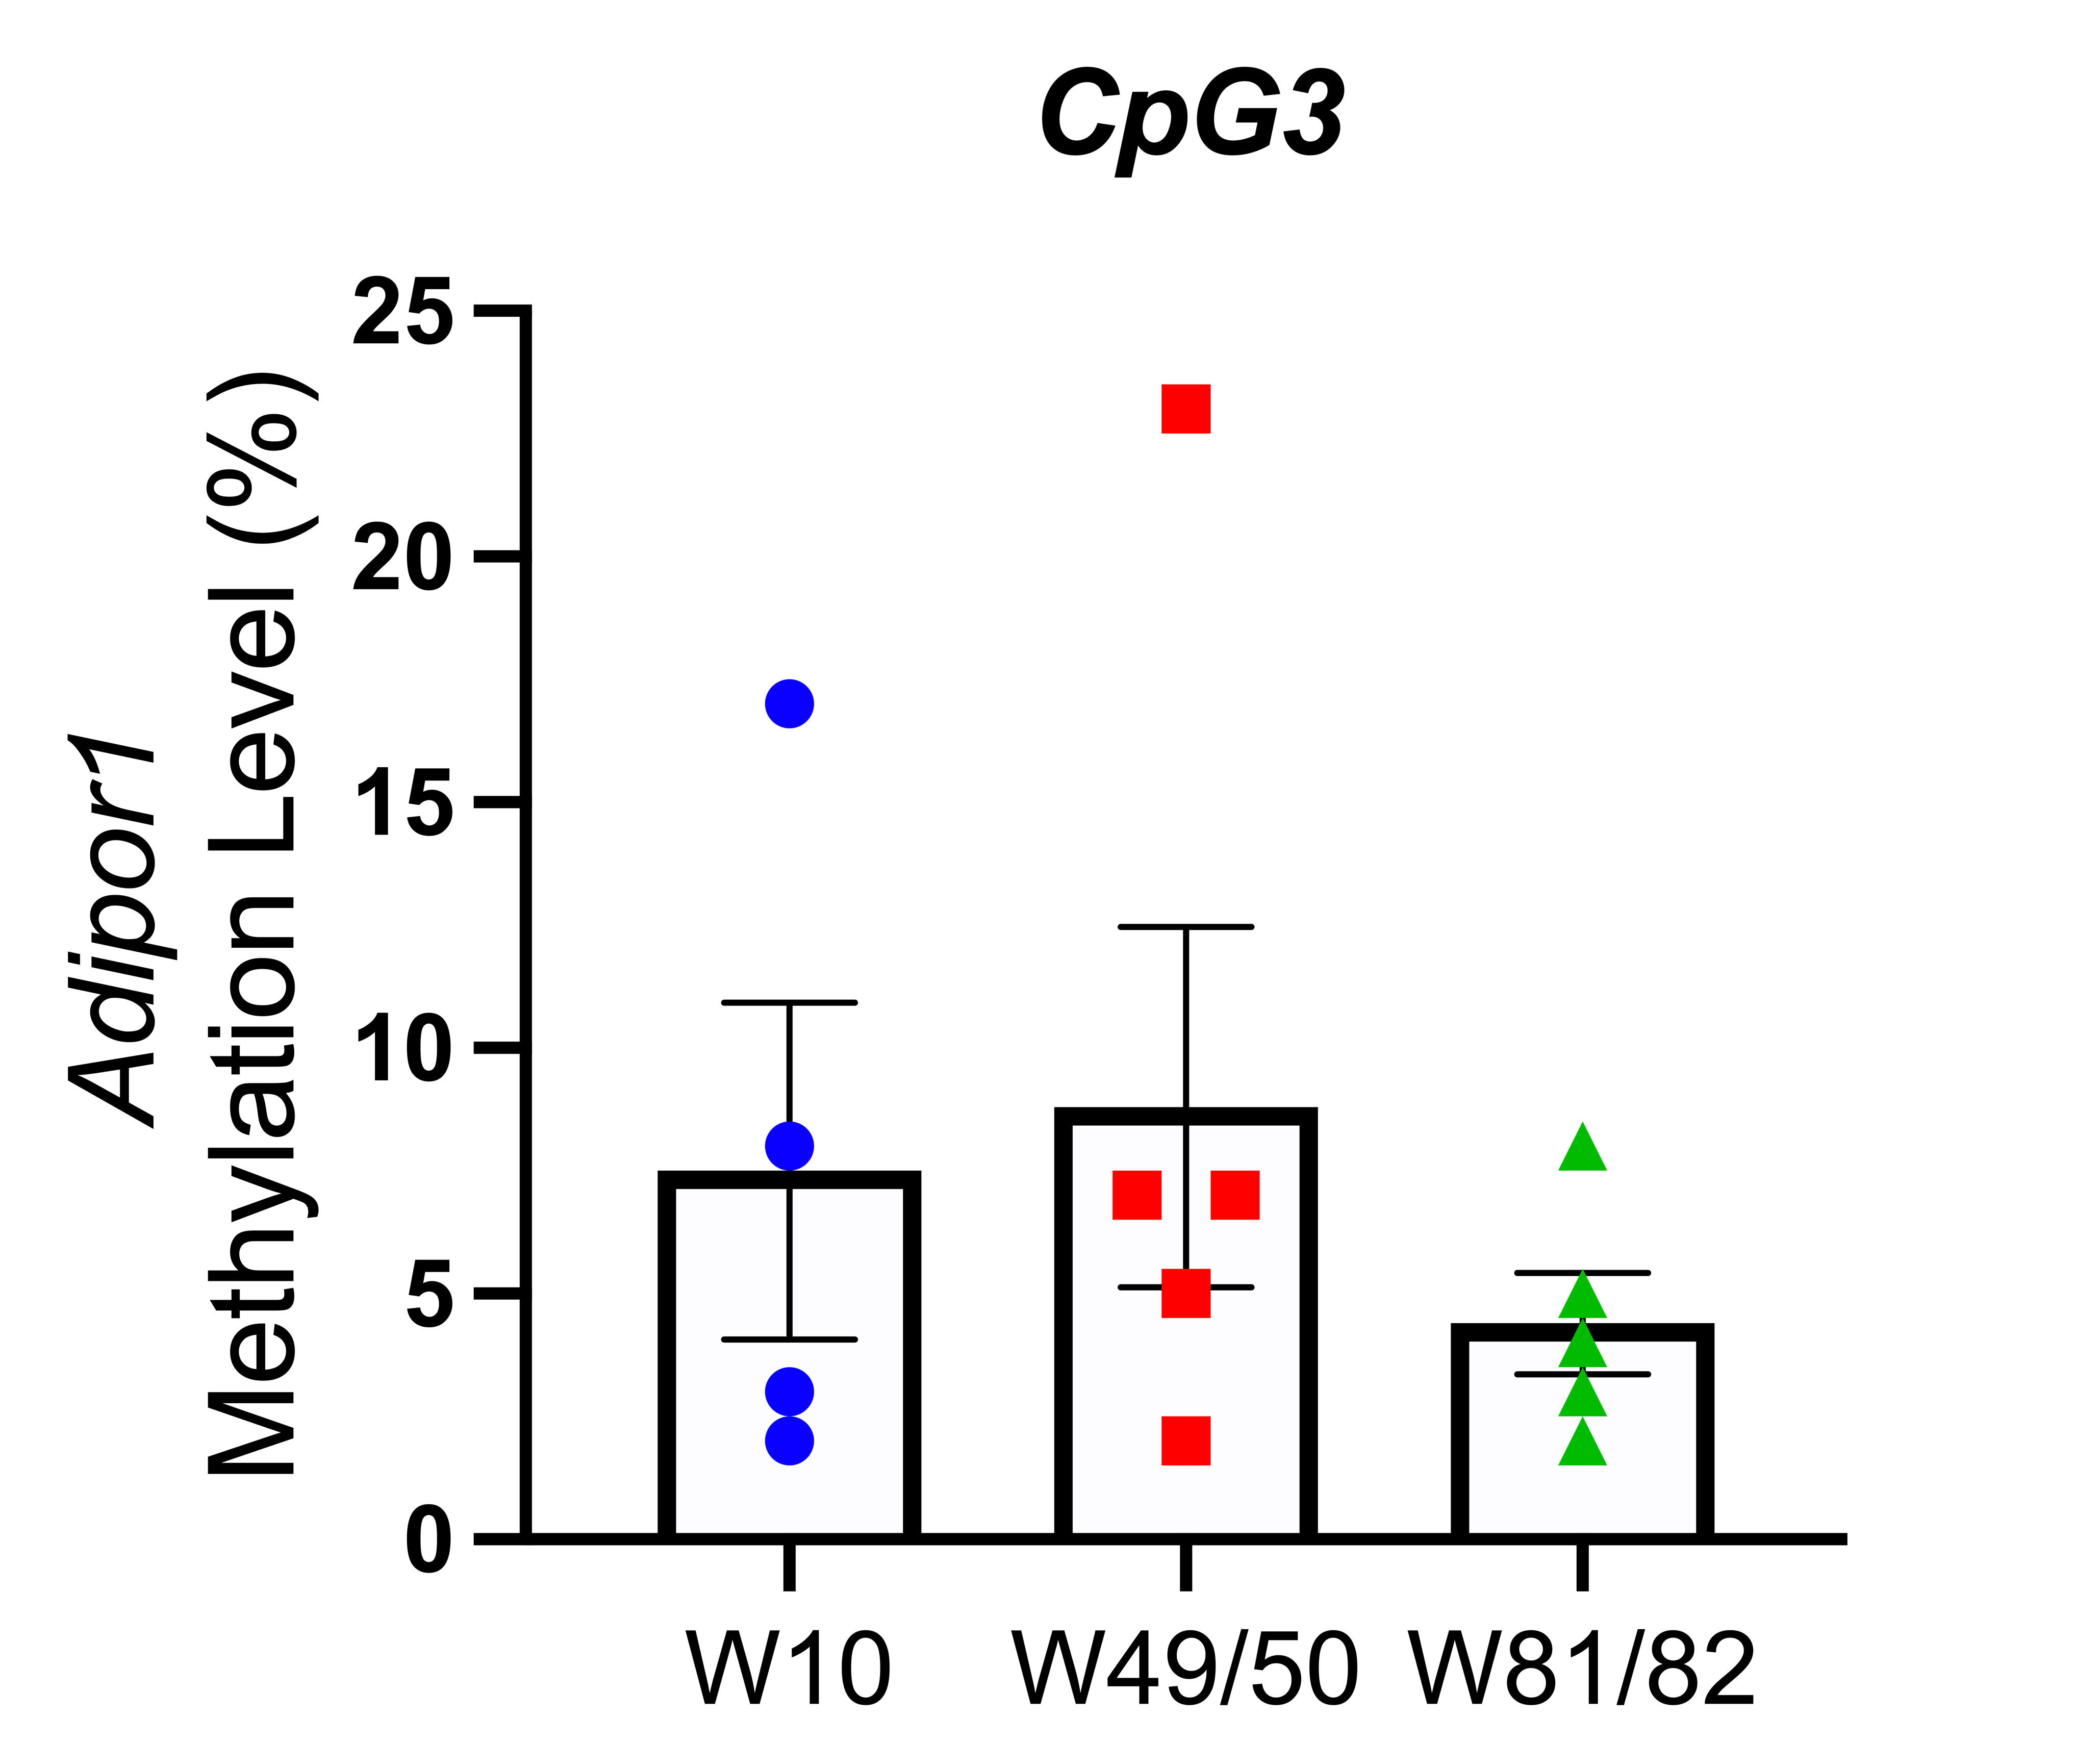


**B.**


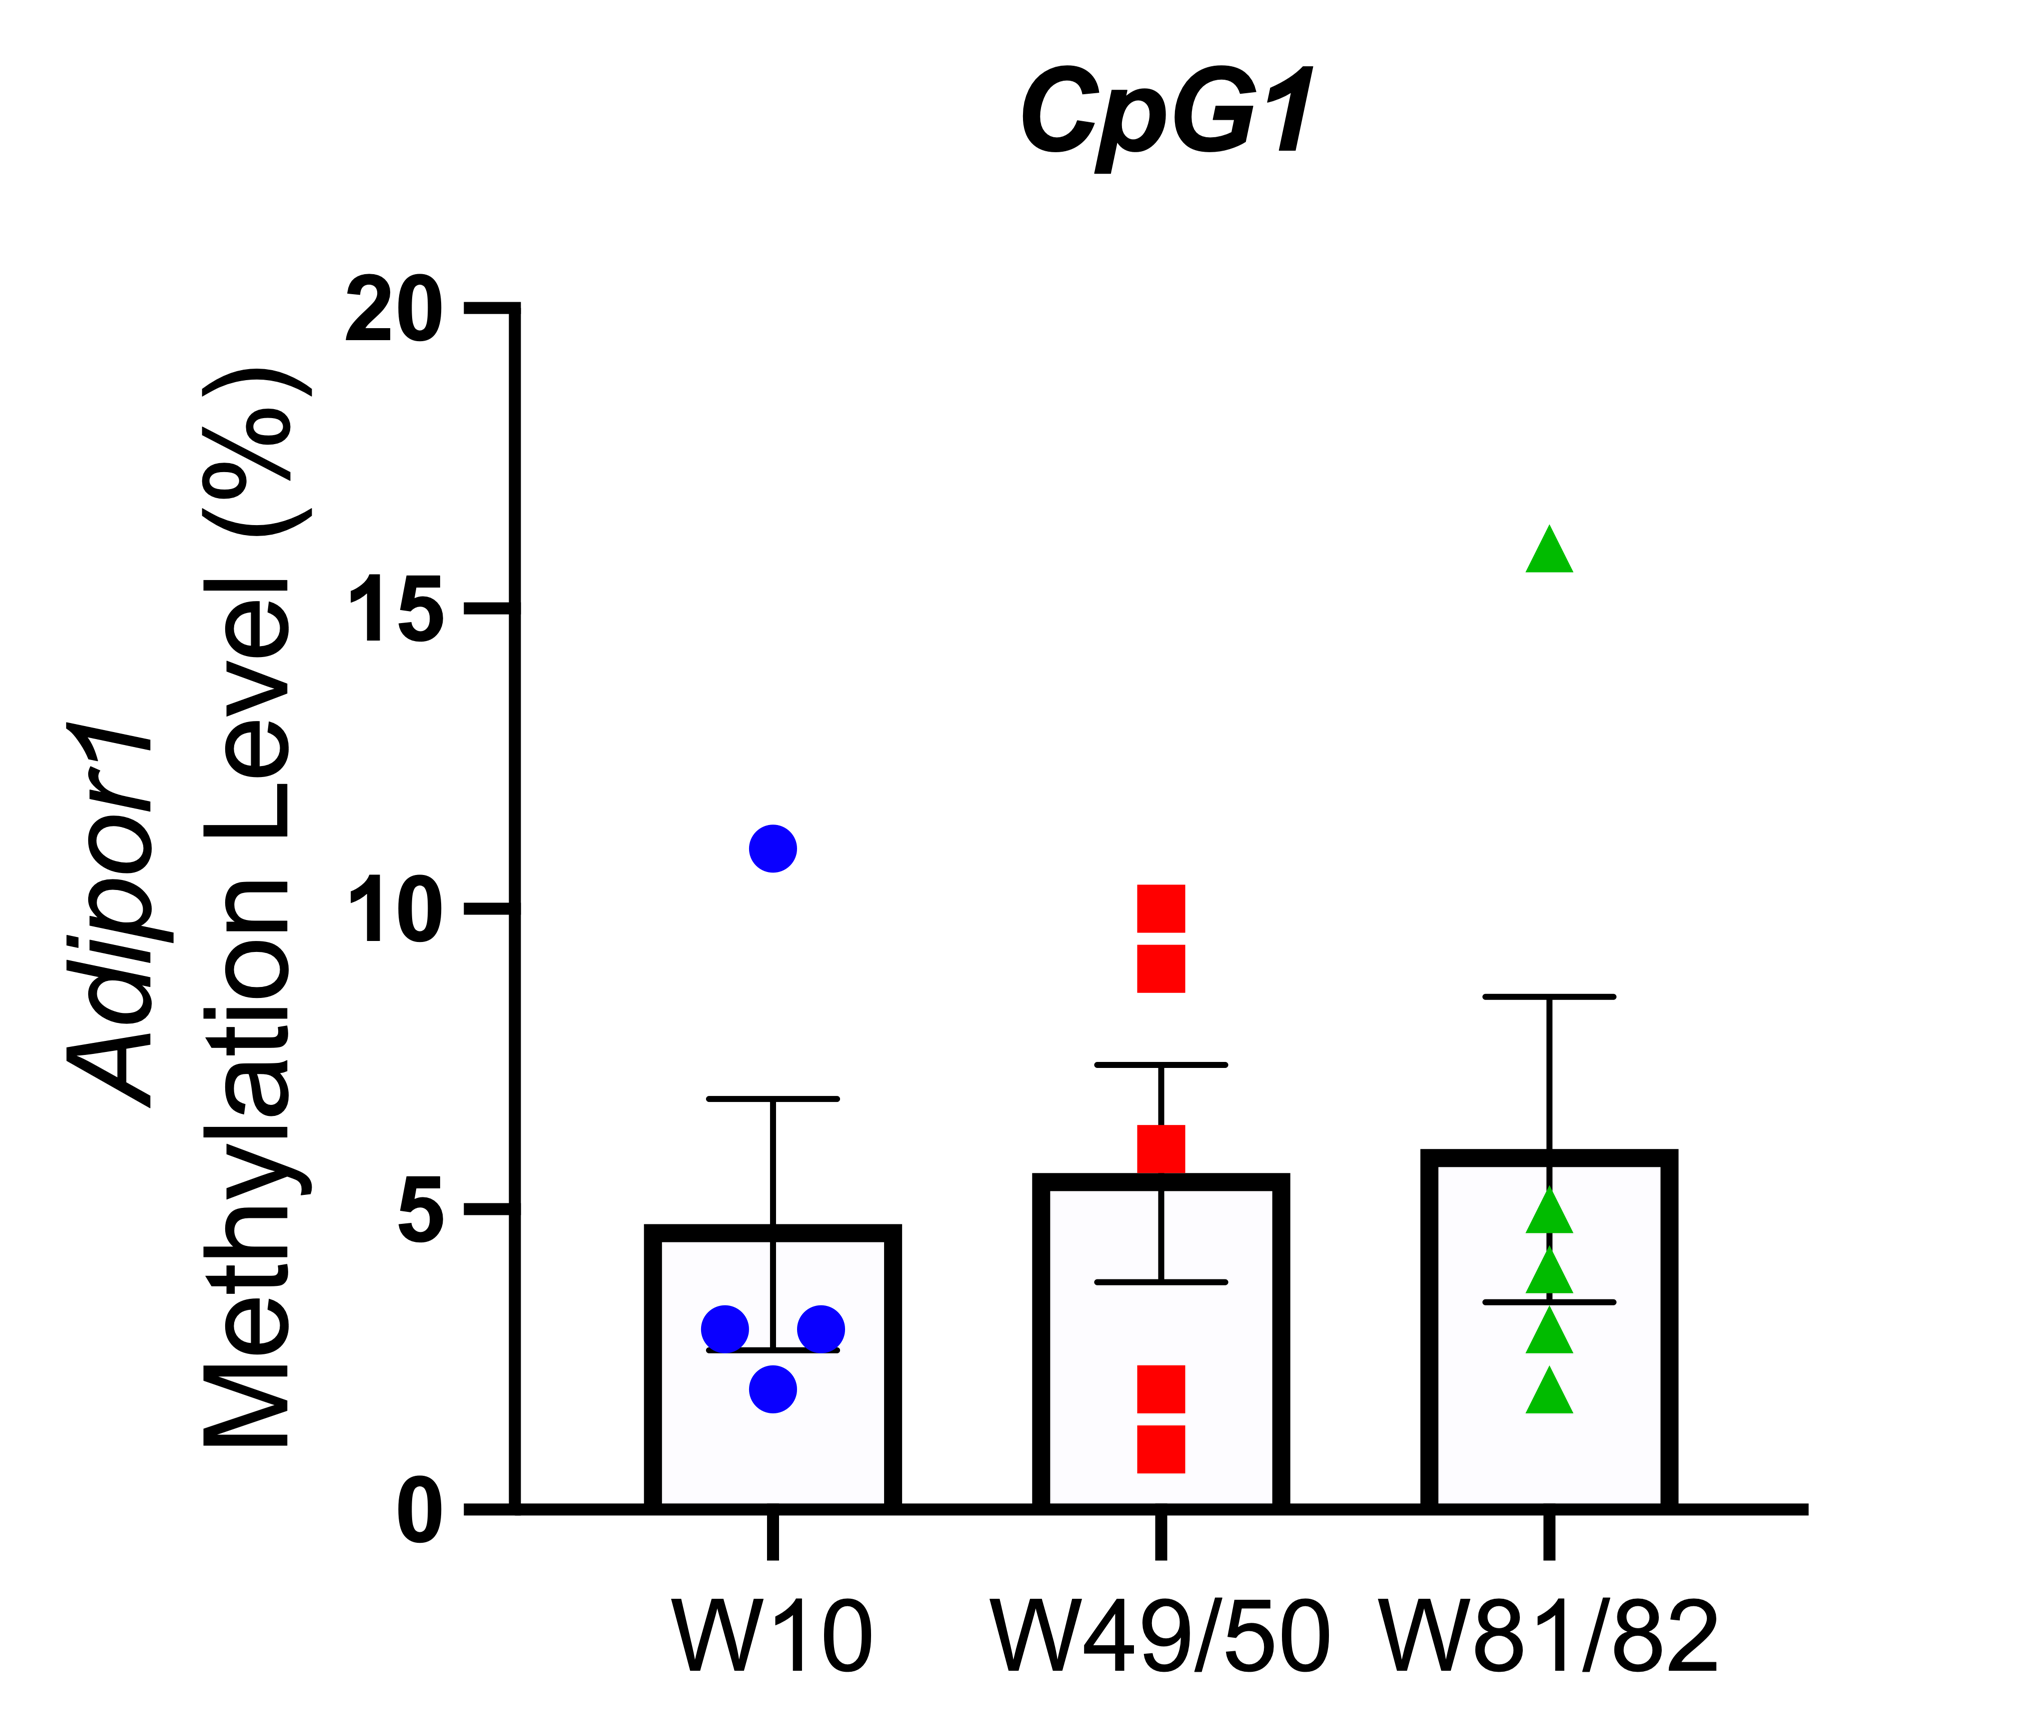

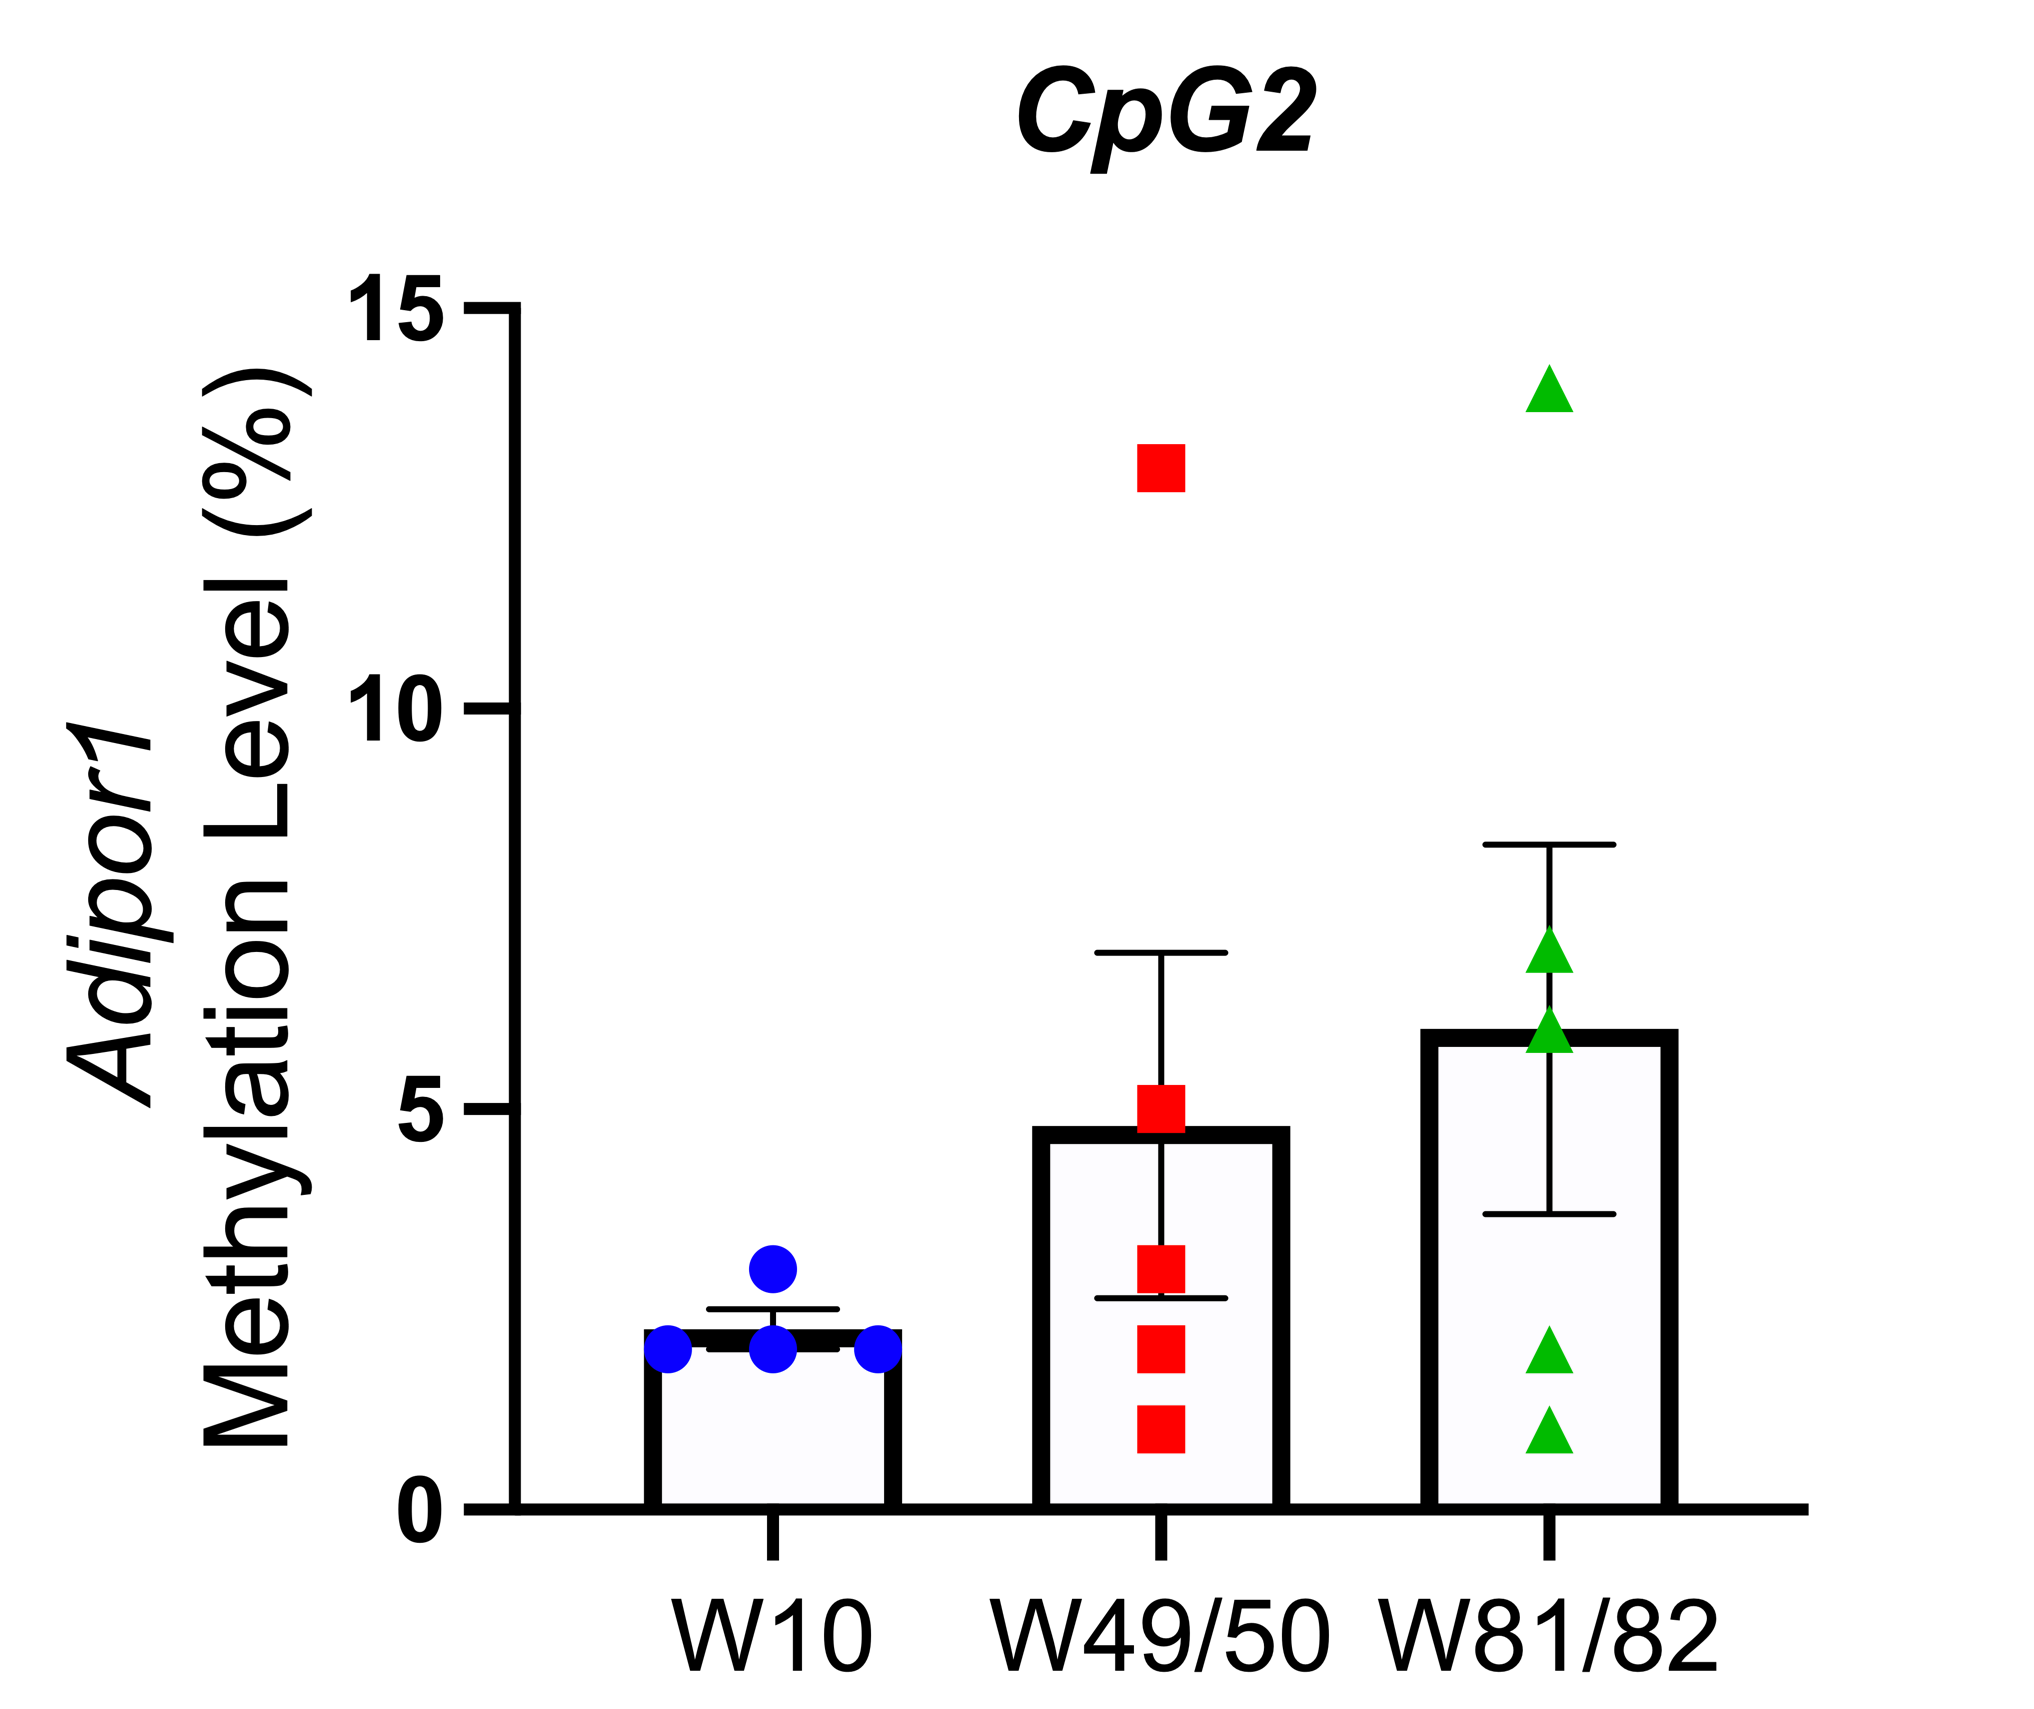

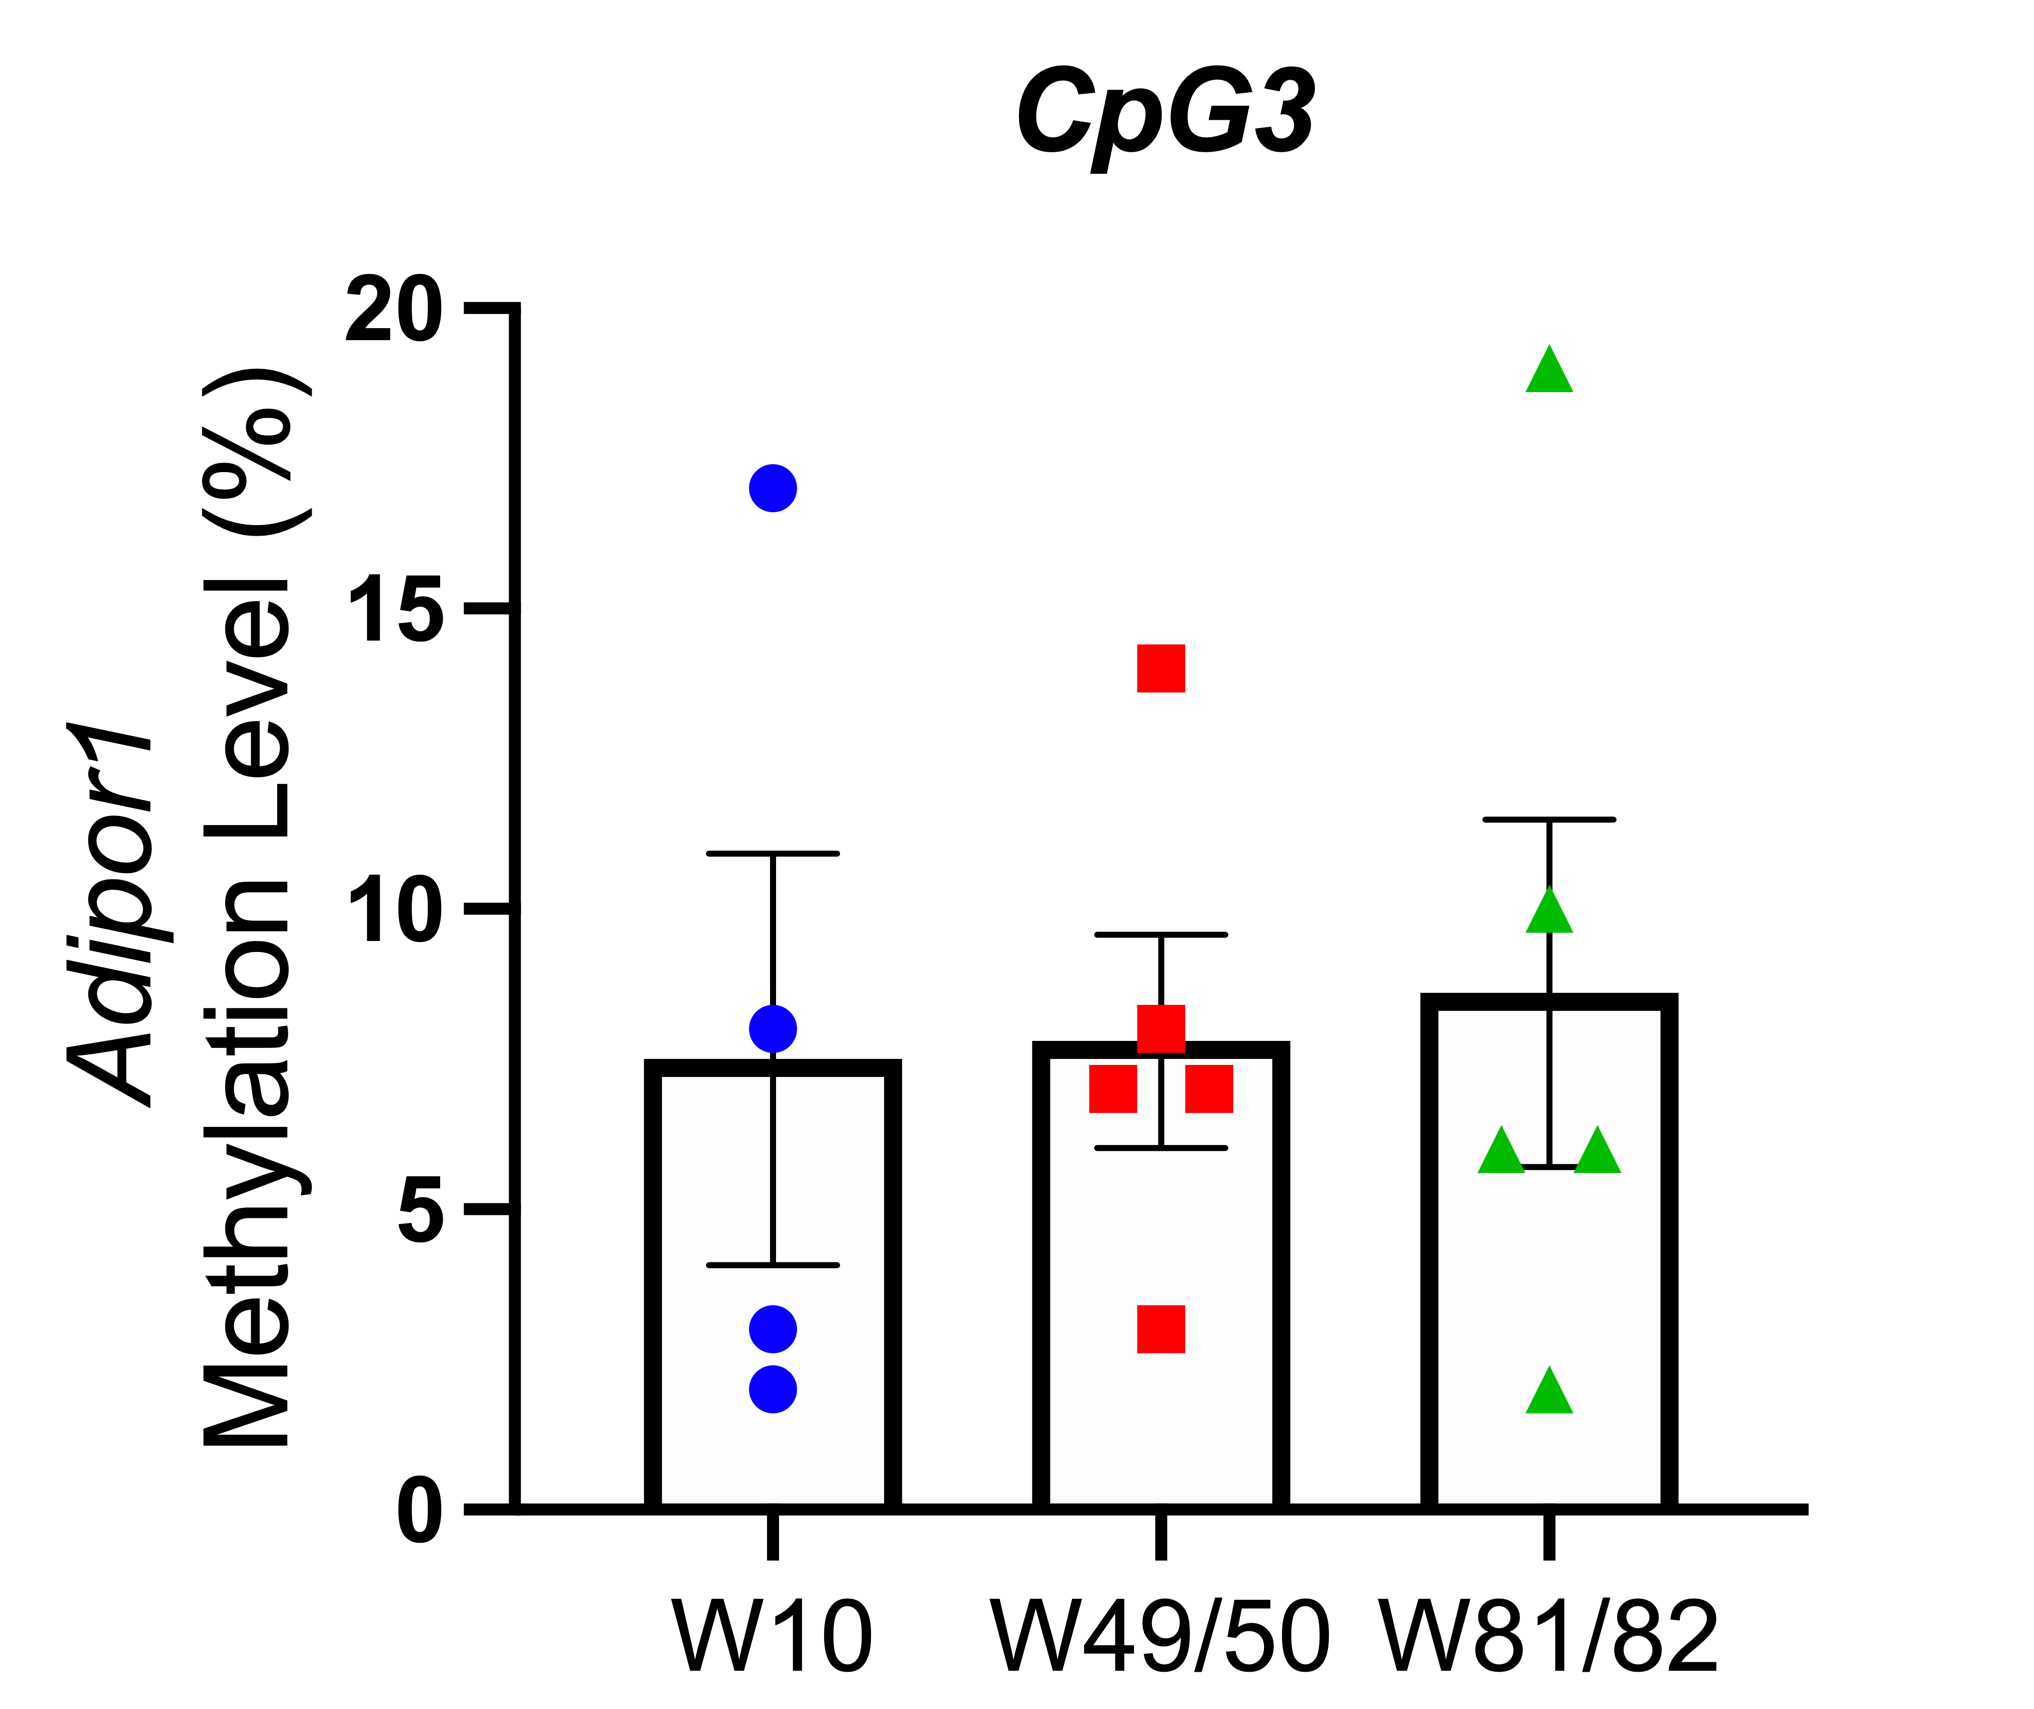


**C.**


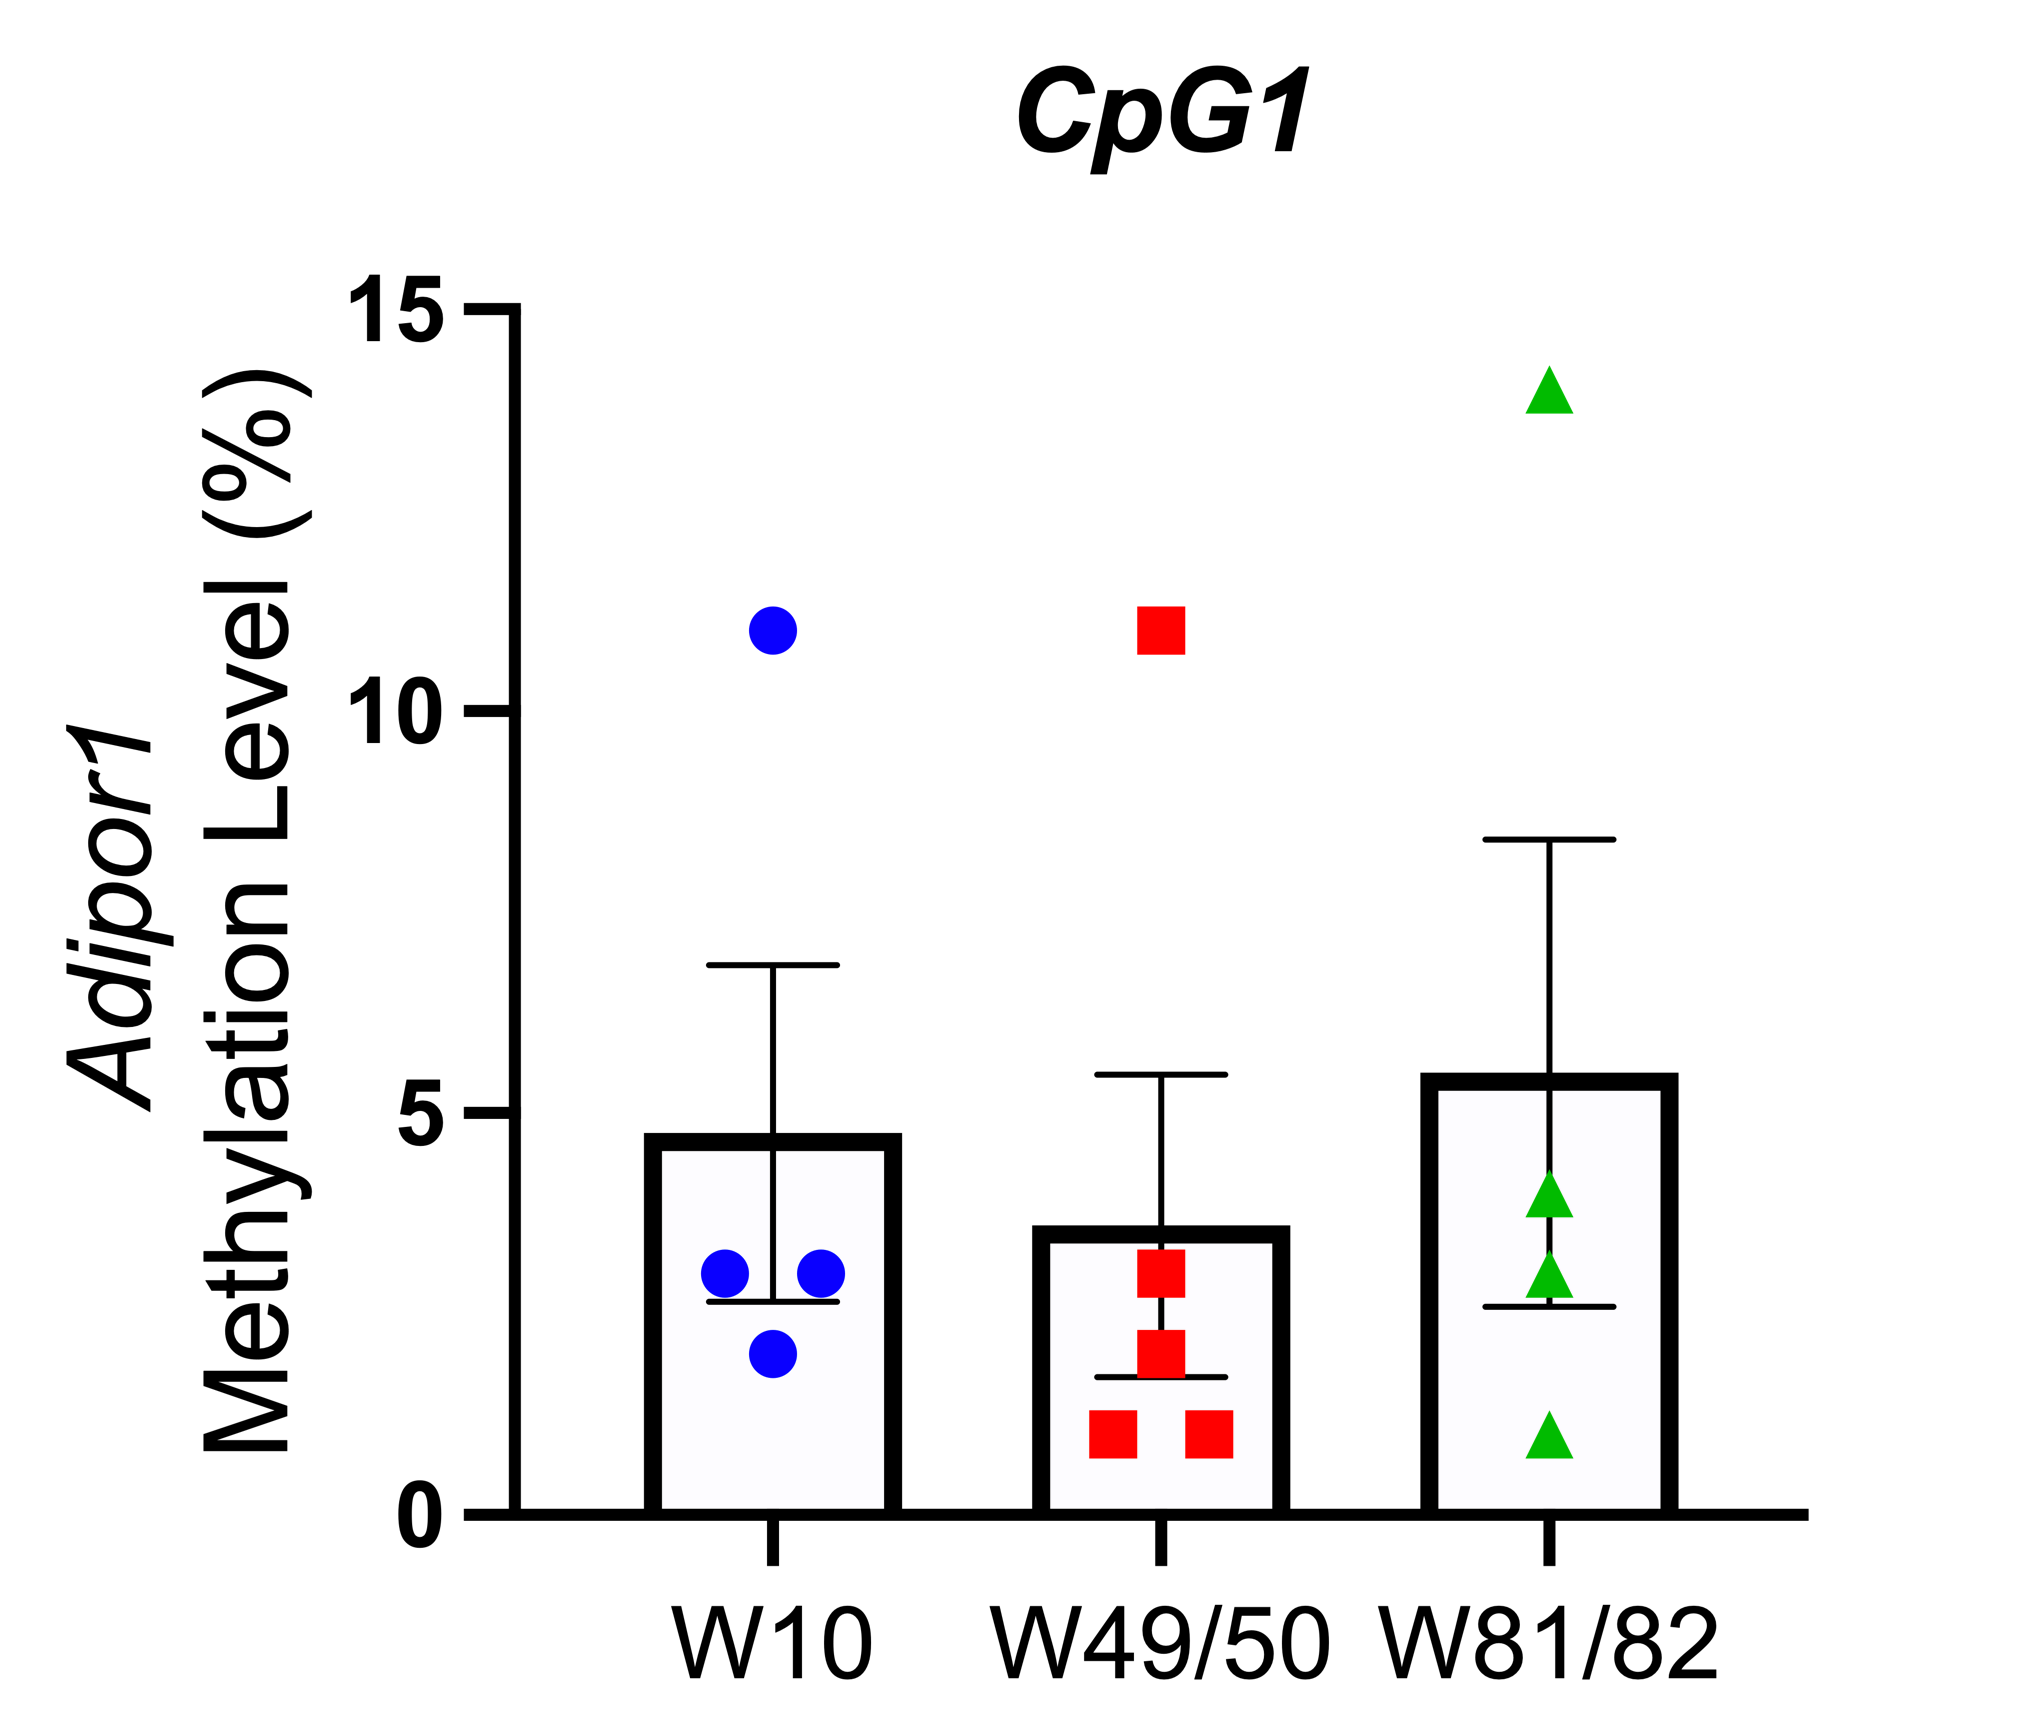

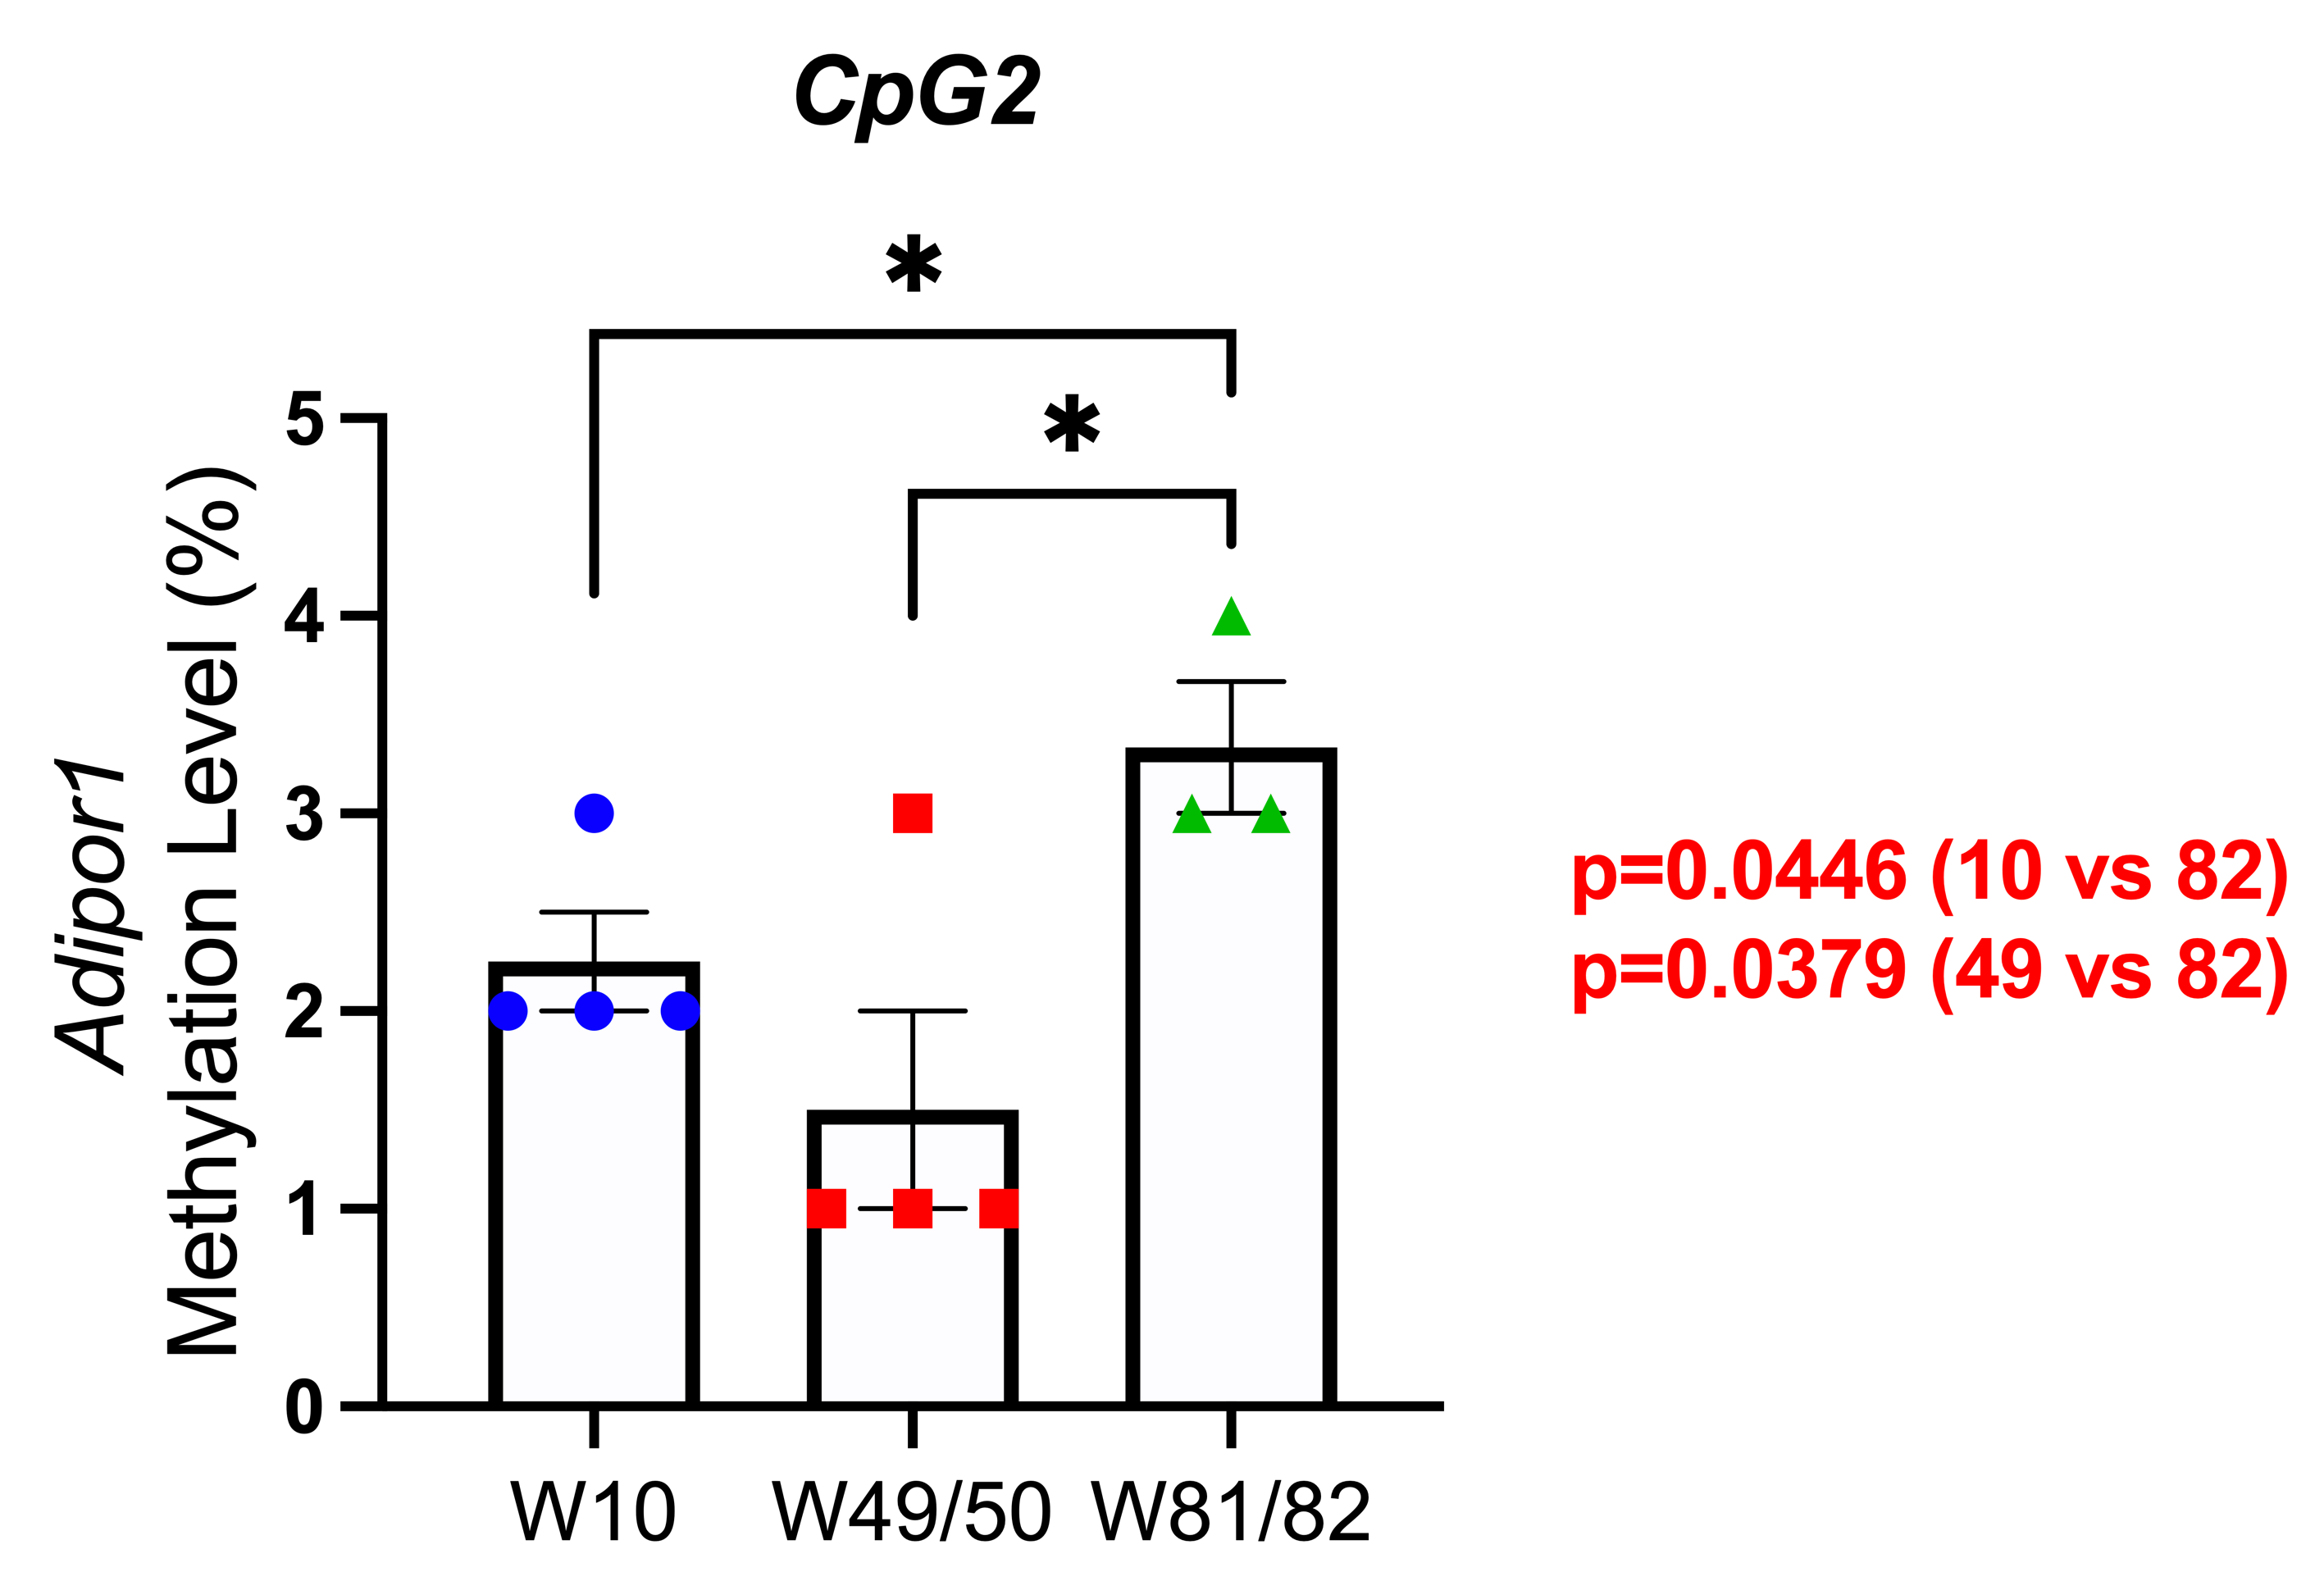

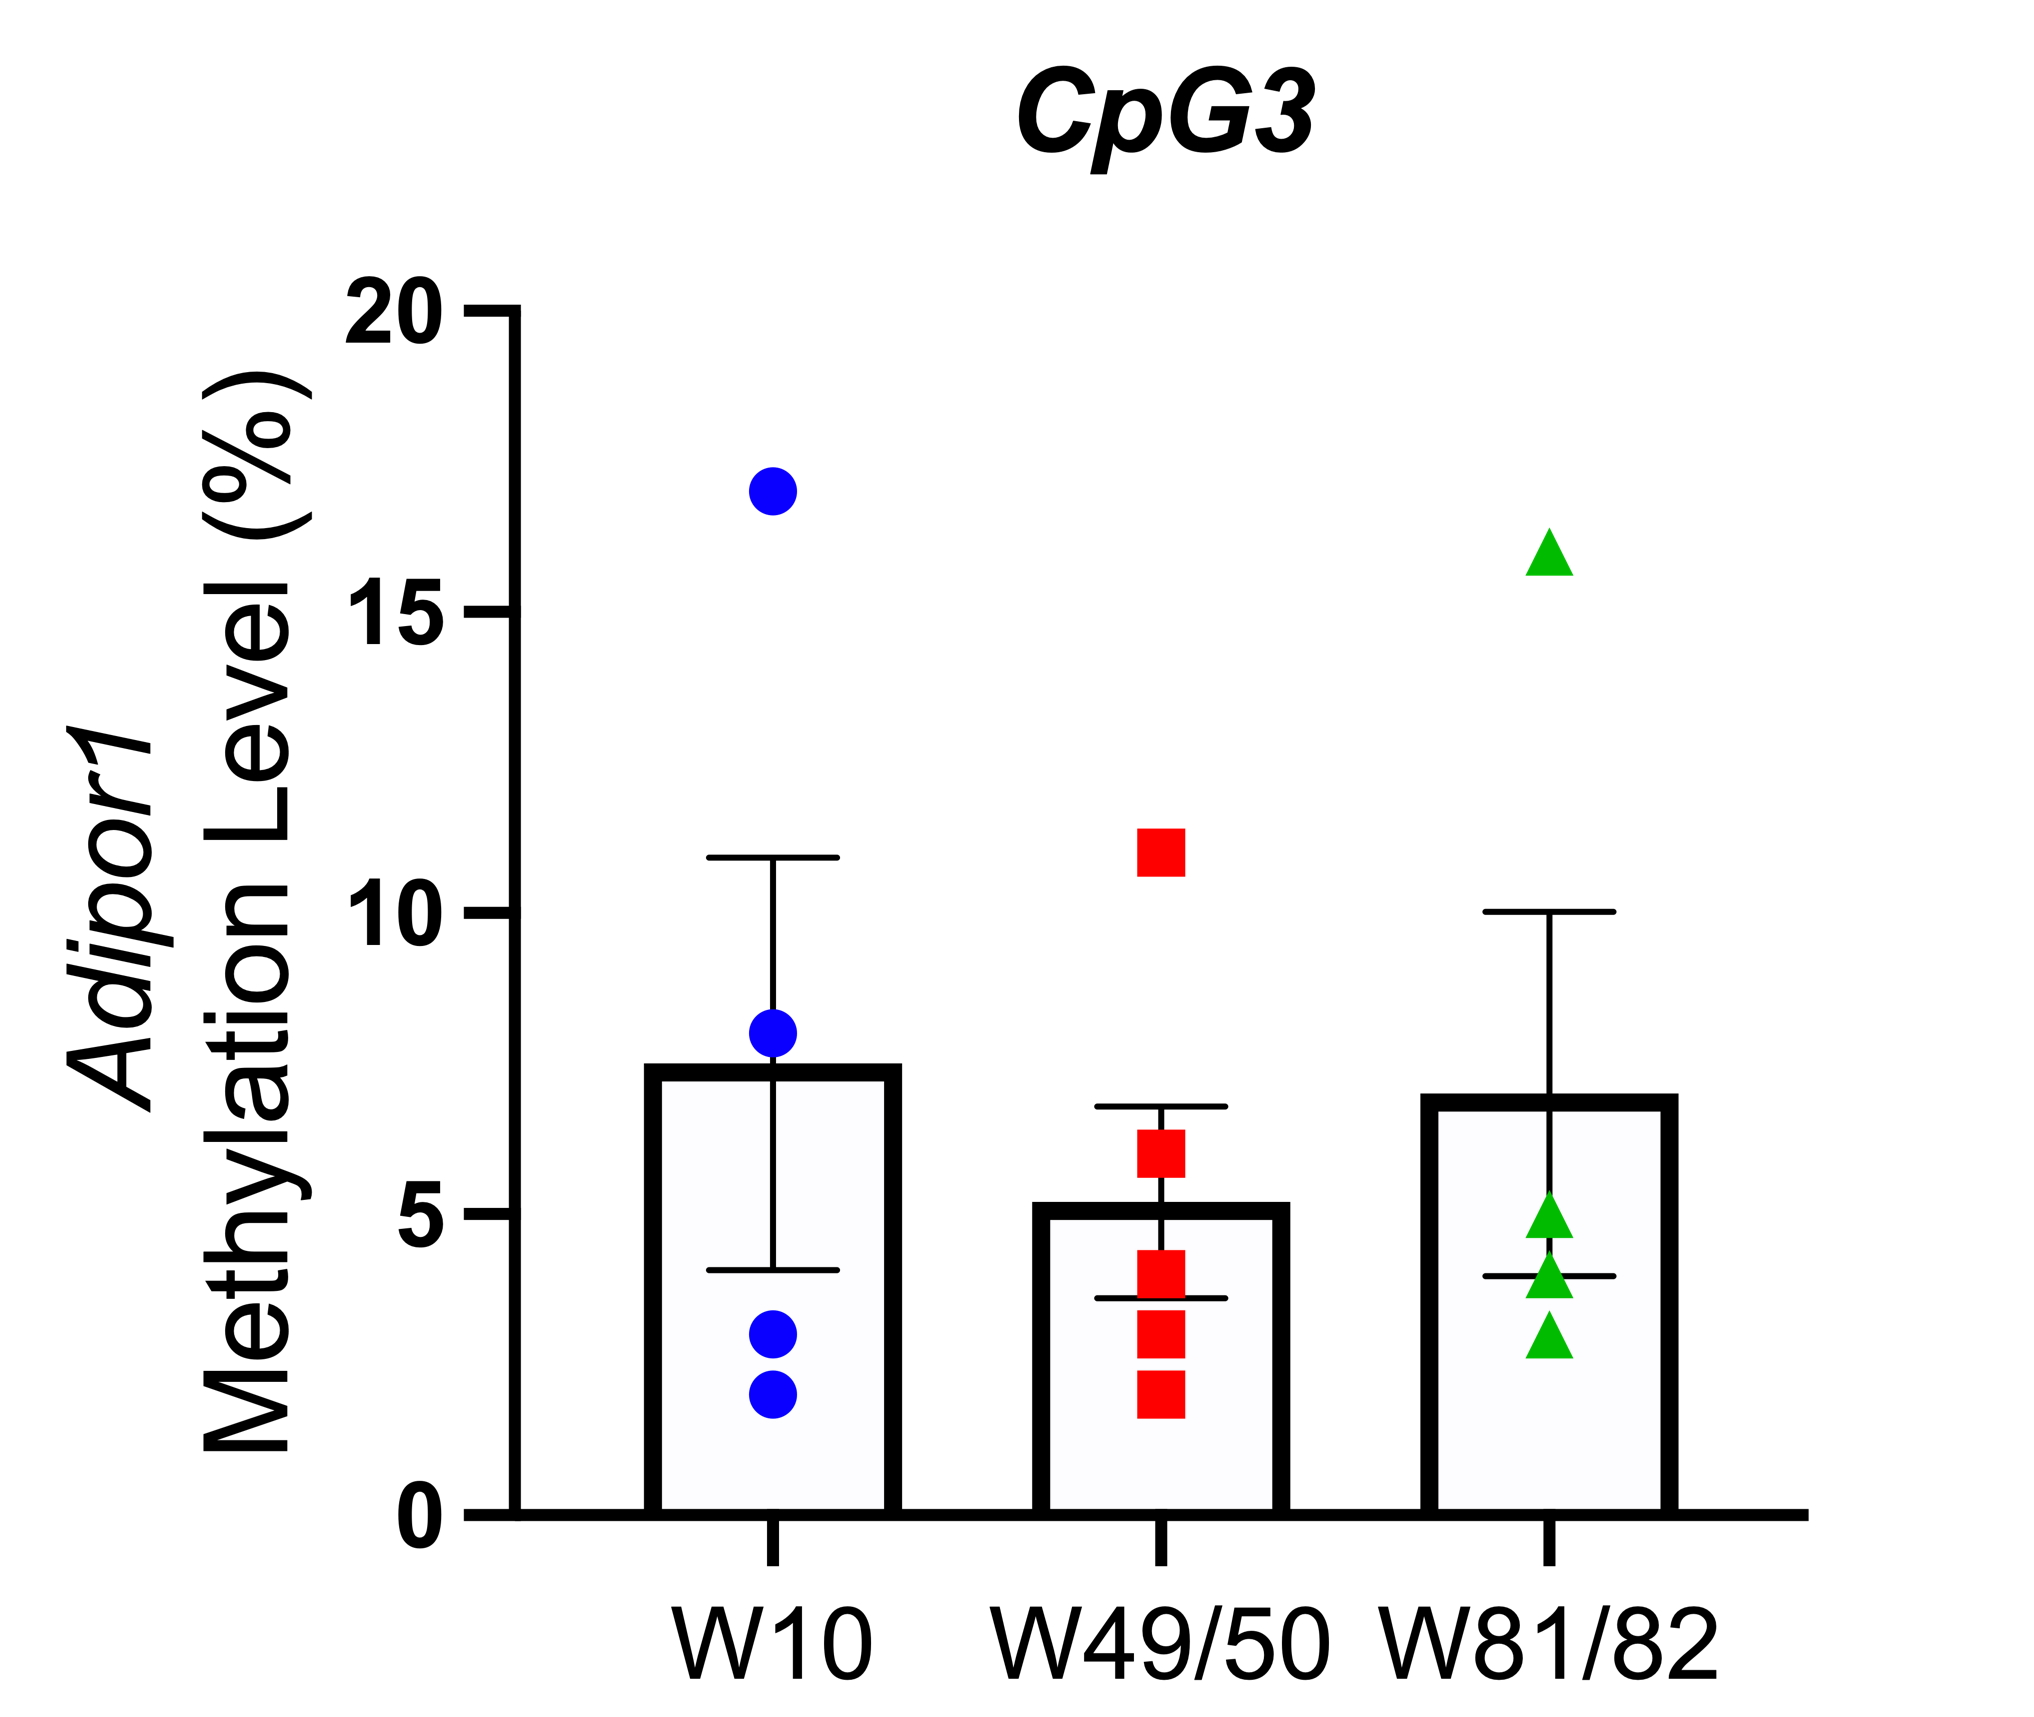


**D.**

**Supplementary Figure 6.** The effects of aging on three individual CpG sites on *Adipor1* promoter in mouse brain; (A) AL (B) CCR (C) ICR-R (D) ICR-RF. Mean ± SEM are presented for each group, n=4-5 biological replicates. Statistical significance determined using one-way ANOVA. *p<0.05.


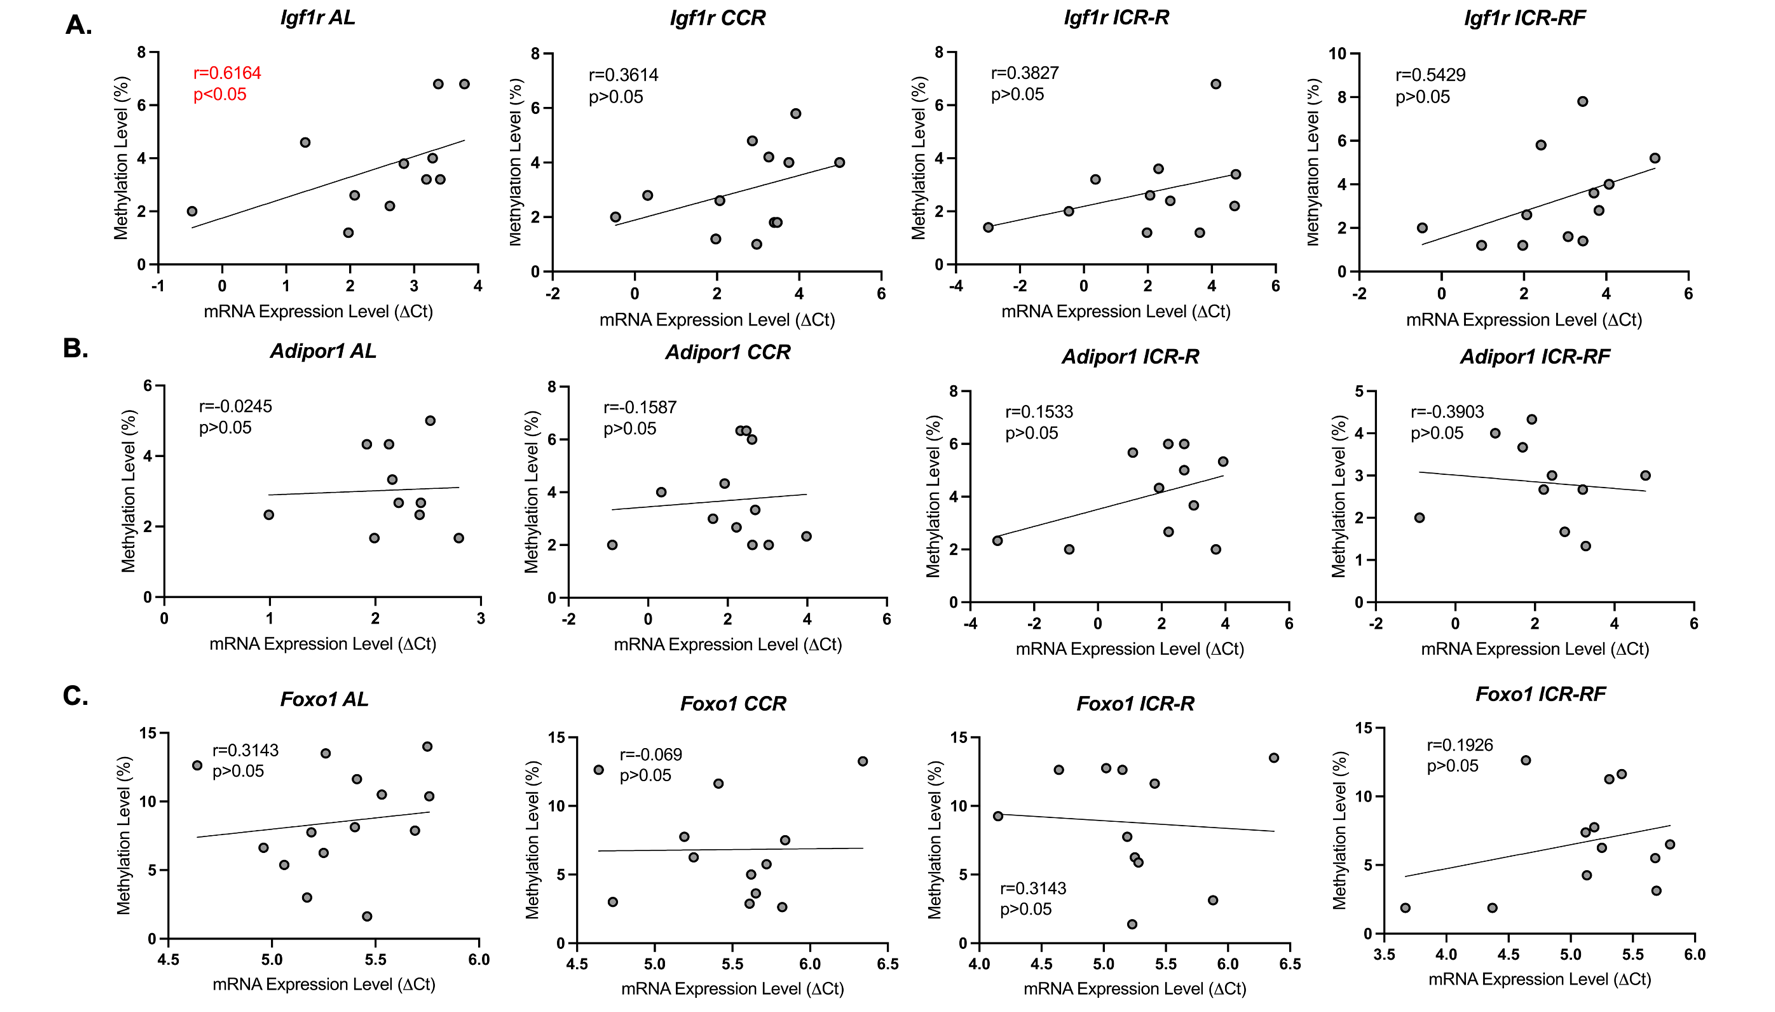


**Supplementary Figure 7.** The Spearman's correlation between the DNA methylation and mRNA expression levels of (A) *Igf1r*, (B) *Adipor1*, (C) *Foxo1* by different types of dietary groups.

**
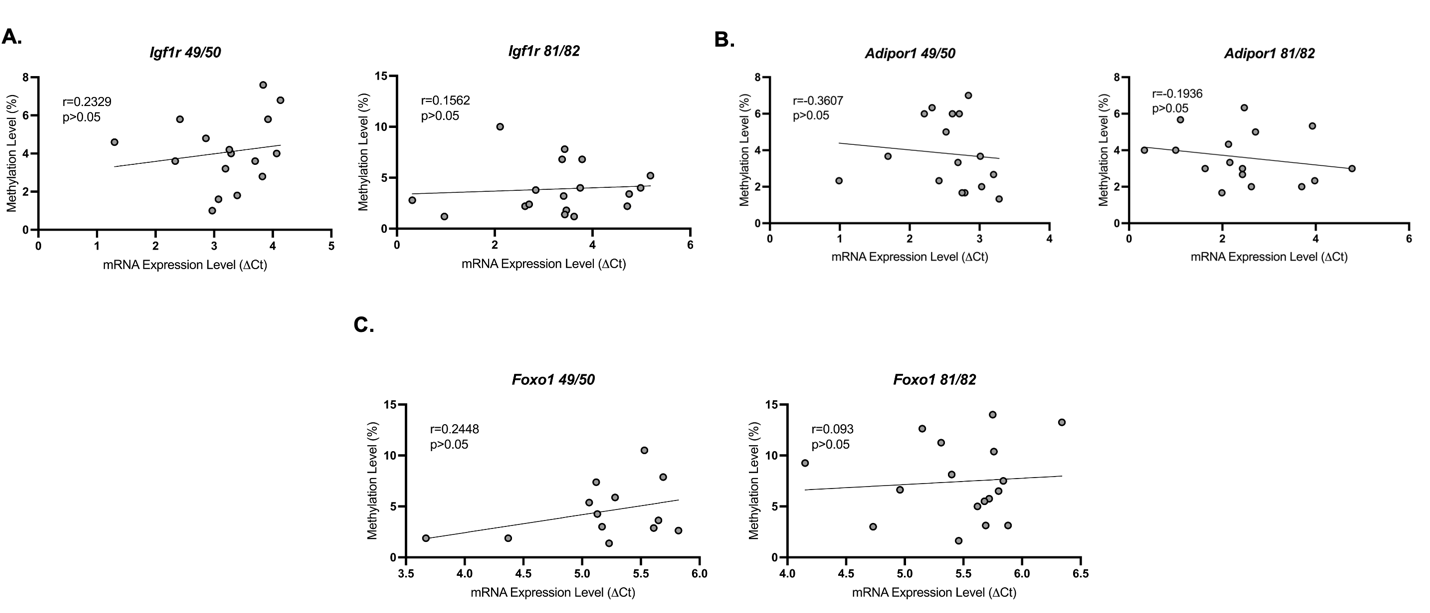
**

**Supplementary Figure 8.** The correlation between the DNA methylation and mRNA expression levels of (A) *Igf1r*, (B) *Adipor1,* and (C) *Foxo1* levels at different time points.

**
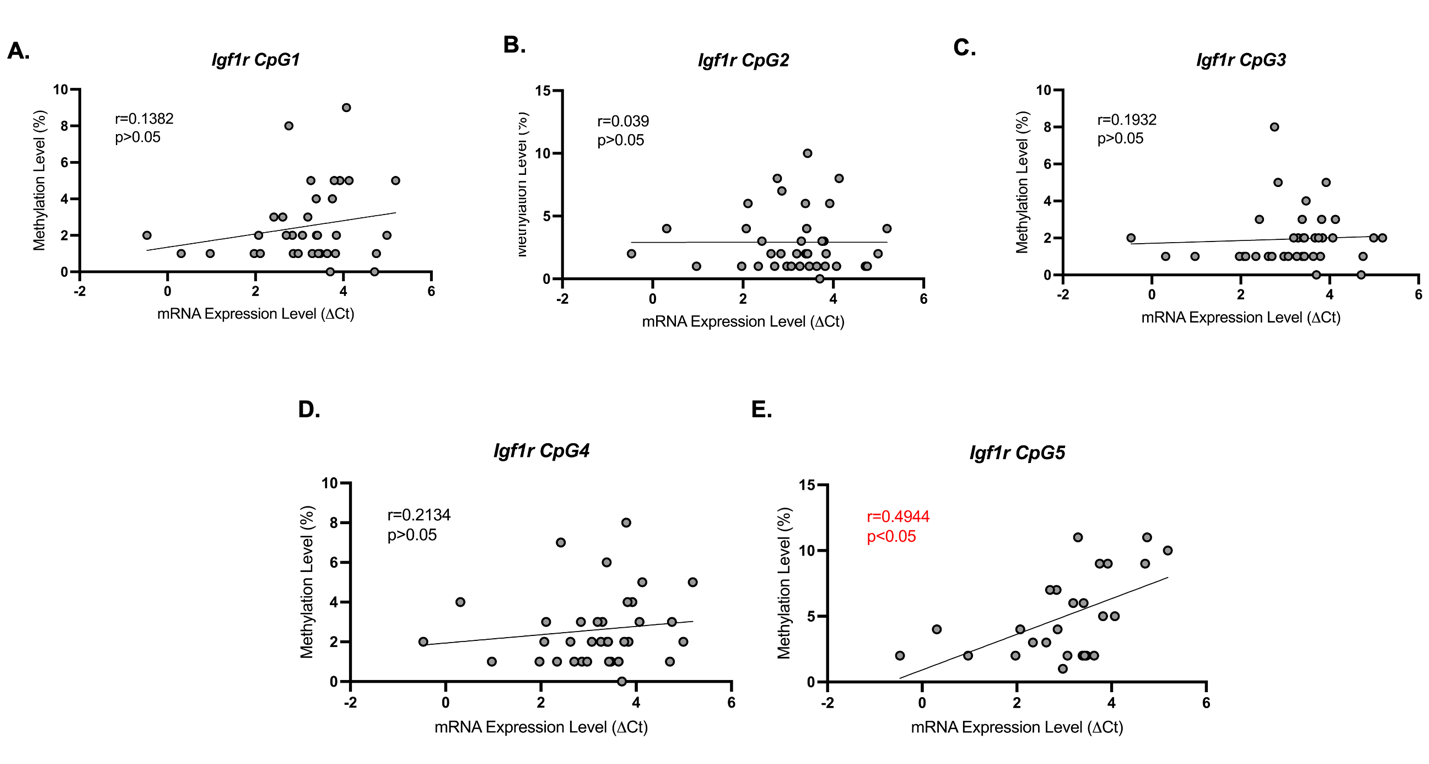
**

**Supplementary Figure 9.** The correlation between the individual CpG site methylation on *Igf1r* promoter and mRNA expression of *Igf1r*.

**
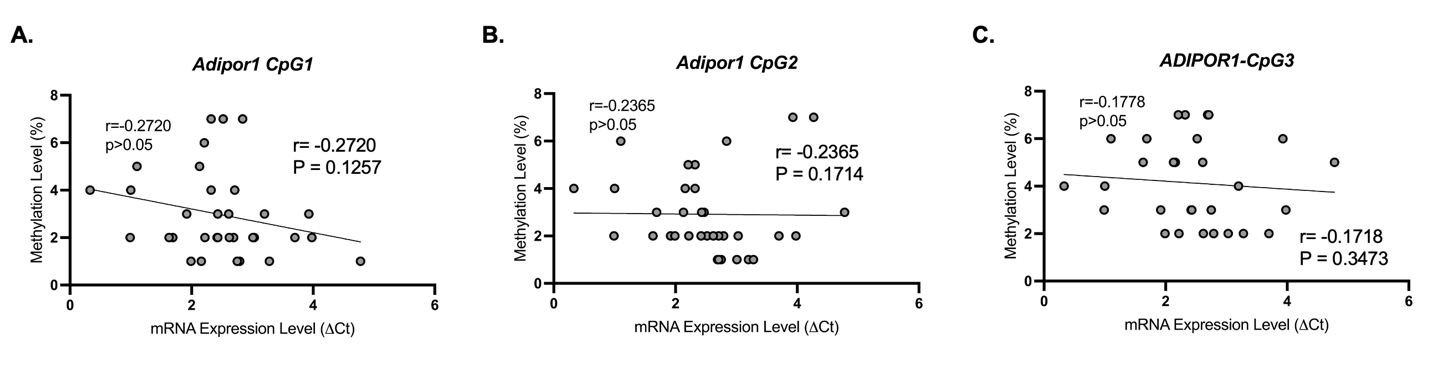
**

**Supplementary Figure 10.** The correlation between the individual CpG site methylation on *Adipor1* promoter and mRNA expression of *Adipor1*.


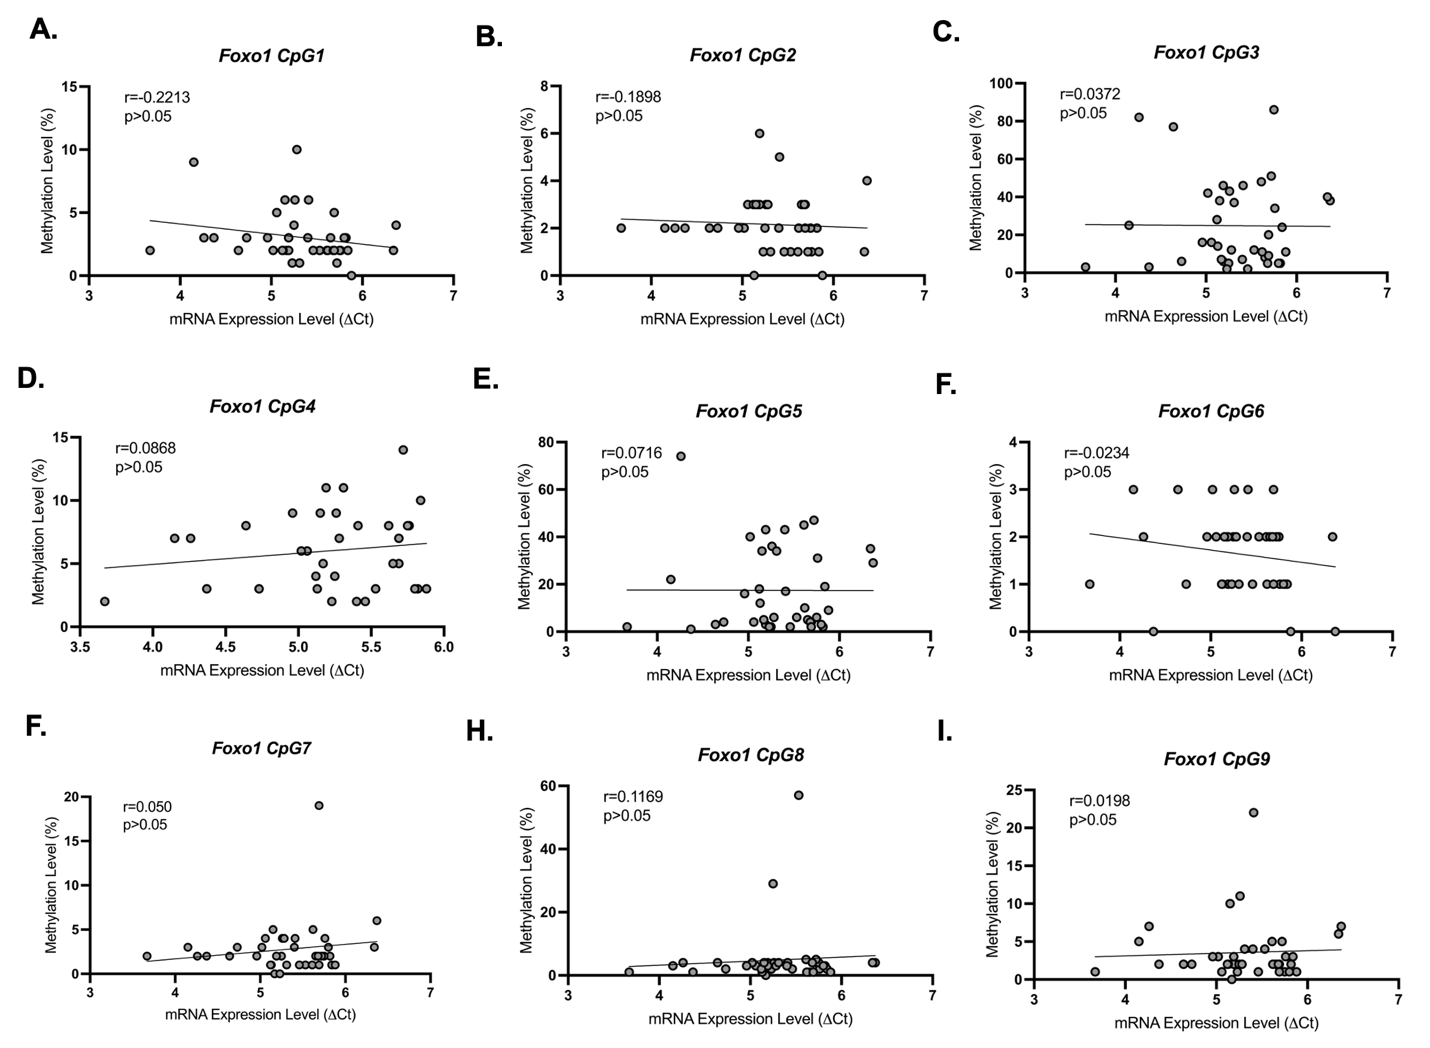


**Supplementary Figure 11.** The correlation between the individual CpG site methylation on *Foxo1* promoter and mRNA expression of *Foxo1*.
